# Supplementary material for: Intense fluorescence of air-stable sodium diarylformamidinate: effective control with a novel electron-withdrawing 4-cyano-3,5-bis(trifluoromethyl)phenyl group
Source: Royal Society of Chemistry journal article supplement (doi:10.1039/d4tc03533j), 2024-11-19
Supplement: d4tc03533j1.pdf [file d4tc03533j1.pdf]

## *Supporting Information*

# **Intense fluorescence of air-stable sodium diarylformamidinate: effective control with a novel electron-withdrawing 4-cyano-3,5-bis(trifluoromethyl)phenyl group**

**Kenichi Michigami,\*<sup>a</sup> Daiki Kawakami,<sup>a</sup> Ichiro Ueda,<sup>b</sup> Shunya Ito,<sup>a</sup> Takuya Ogaki,<sup>c,d</sup>  
Hiroshi Ikeda,<sup>c,d</sup> and Masato Ohashi\*<sup>a</sup>**

<sup>a</sup> *Department of Chemistry, Graduate School of Science, Osaka Metropolitan University  
Sugimoto-cho, Sumiyoshi-ku, Osaka-shi, Osaka 558-8585, Japan*

<sup>b</sup> *Department of Chemistry, Graduate School of Science, Osaka Prefecture University  
Gakuen-cho, Naka-ku, Sakai-shi, Osaka 599-8531, Japan*

<sup>c</sup> *Department of Applied Chemistry, Graduate School of Engineering, Osaka Metropolitan University  
Gakuen-cho, Naka-ku, Sakai-shi, Osaka 599-8531, Japan*

<sup>d</sup> *The Research Institute for Molecular Electronic Devices (RIMED), Osaka Metropolitan University  
Gakuen-cho, Naka-ku, Sakai-shi, Osaka 599-8531, Japan*

E-mail: kn1michigmai@omu.ac.jp, ohashi@omu.ac.jp

## **Table of Contents**

|            |                                                                |            |
|------------|----------------------------------------------------------------|------------|
| <b>(A)</b> | <b>General</b>                                                 | <b>S2</b>  |
| <b>(B)</b> | <b>Materials &amp; Methods</b>                                 | <b>S3</b>  |
| <b>(C)</b> | <b>Cyclic Voltammetry (CV)</b>                                 | <b>S10</b> |
| <b>(D)</b> | <b>Absorption &amp; Emission Properties</b>                    | <b>S11</b> |
| <b>(E)</b> | <b>Cation Effects on the Absorption &amp; Emission Spectra</b> | <b>S19</b> |
| <b>(F)</b> | <b>Solid-State Emission Properties</b>                         | <b>S22</b> |
| <b>(G)</b> | <b>Solvent Effects on the Absorption &amp; Emission</b>        | <b>S23</b> |
| <b>(H)</b> | <b>Emission Lifetimes</b>                                      | <b>S24</b> |
| <b>(I)</b> | <b>Temperature Dependence of Photoluminescence</b>             | <b>S25</b> |
| <b>(J)</b> | <b>Computational Details</b>                                   | <b>S26</b> |
| <b>(K)</b> | <b>Copies of NMR Spectra</b>                                   | <b>S50</b> |
| <b>(L)</b> | <b>References</b>                                              | <b>S70</b> |

## (A) General

All manipulations were carried out under an atmosphere of N<sub>2</sub> or inside N<sub>2</sub>-filled glove box unless otherwise noted. Column chromatography was performed with Cica silica gel 60N (40–100 μm, spherical, neutral). NMR spectra were recorded on a JEOL ECS-400 spectrometer or a Varian 400-MR FT-NMR spectrometer, operating at 400 MHz (<sup>1</sup>H), or 101 MHz (<sup>13</sup>C), or 376 MHz (<sup>19</sup>F). Chemical shifts in the internal reference solvents were reported in the following scales: for <sup>1</sup>H NMR, CDCl<sub>3</sub>, CD<sub>3</sub>CN, and DMSO-*d*<sub>6</sub> were relative to CHD<sub>2</sub>CN (1.94 ppm), and CHD<sub>2</sub>SOCD<sub>3</sub> (2.50 ppm), respectively, and for <sup>13</sup>C NMR, CD<sub>3</sub>CN (1.32 ppm), and (CD<sub>3</sub>)<sub>2</sub>SO (39.52 ppm) were reported, respectively. Chemical shifts in each solvent for <sup>19</sup>F NMR were reported in the scale relative to PhCF<sub>3</sub> (-65.64 ppm) as an external reference. NMR data are reported as follows: chemical shifts, multiplicity (s: singlet, d: doublet, t: triplet, q: quartet, m: multiplet, br: broad signal), coupling constant (Hz), and integration. Infrared (IR) spectroscopy was performed using a Jasco FT/IR-4100 spectrometer. High-resolution mass spectra (HRMS) were measured on a Bruker micrOTOFII time-of-flight mass spectrometer fitted with an ESI. Melting points (Mp.) were measured on a Yanaco Mp-JS apparatus equipped with a thermometer (30–300 °C). X-ray diffraction data were collected on either a HyPix-6000HE detector equipped in Rigaku XtaLAB Synergy attached with multi-layer mirror monochromate and PhotonJet-S (Cu-K, λ = 1.54187 Å) or a Rigaku R-AXIS RAPID diffractometer using multi-layer mirror monochromated Mo-K<sub>α</sub> radiation (λ = 0.71075 Å). The hydrogen atoms were refined using the riding model. All the calculations and refinement were performed by using SHELXL Version 2022/1. UV-Vis absorption spectra were recorded on a JASCO V-670 spectrometer. Emission spectra were recorded on a JASCO FP-8500 spectrometer and a JASCO FP-6200 spectrofluorometer with a UNISOKU CoolSpeK cryostat. Emission lifetimes were determined using a HORIBA Jobin Yvon FluoroCube lifetime spectrofluorometer equipped with HORIBA NanoLED-455 (excitation wavelength = 455 nm) as an excitation light source and analyzed by a DAS6 FL decay analysis software. Solvents and reagents were obtained from commercial suppliers and used as received. The solvents marked as “SPS” (THF, Et<sub>2</sub>O, toluene, and hexane) were purified by the solvent purification system GlassContour 4S. The solvents marked as “distilled” were stored in the glove box after purification by distillation using the following drying agents: Na/benzophenone for THF, Et<sub>2</sub>O, toluene, and hexane; CaH<sub>2</sub> for MeCN, CD<sub>3</sub>CN, and CH<sub>2</sub>Cl<sub>2</sub>. Distilled water was purchased from Nacalai Tesque Inc. and used as received.

## (B) Materials & Methods

Methyl 4-aminobenzoate (**1a**), 4-aminophenyl methyl sulfone (**1b**), 4-cyanoaniline (**1c**), 4-nitroaniline (**1d**), 3,5-bis(trifluoromethyl)aniline (**1e**), and 4-cyano-3-(trifluoromethyl)aniline (**1f**) were purchased from commercial sources and used as received.

### (B-1) Synthesis of **1g**

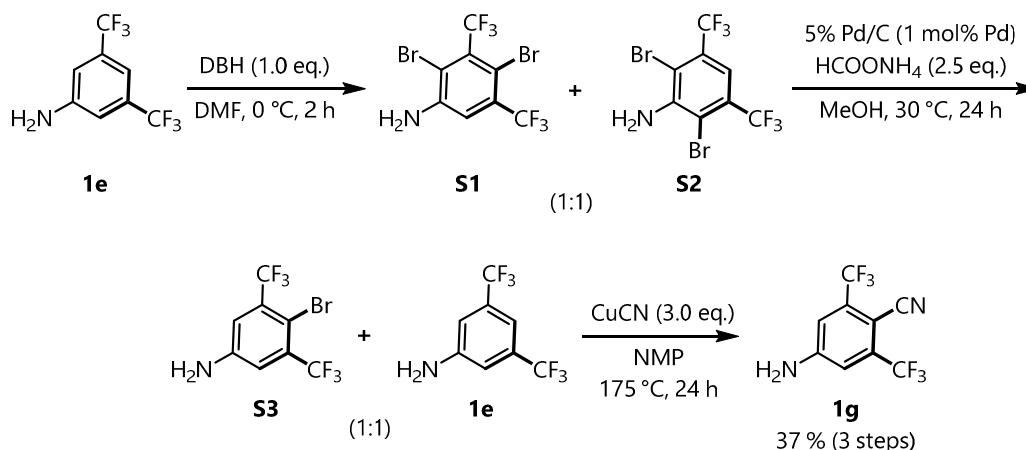

### 4-Amino-2,6-bis(trifluoromethyl)benzonitrile (**1g**)<sup>S1</sup>

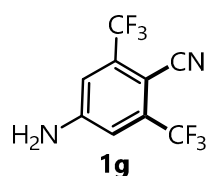

**1g** was prepared basically according to the known procedures, but modified to increase the selectivity of bromination at 4-position: Under air, 1,3-dibromo-5,5-dimethyl-hydantoin (DBH) (28.6 g, 100 mmol, 1.0 equiv) was added in one portion to the stirred solution of 3,5-bis(trifluoromethyl)aniline (**1e**) (22.9 g, 100 mmol, 1.0 equiv) in DMF (100 mL) and stirred at 0 °C for 4 h. After monitoring the reaction progress by TLC, the mixture was diluted with water (300 mL) and extracted with EtOAc (30 mL, 3 times). The combined organic layer was washed with water (100 mL, 5 times) and brine (30 mL, twice), and dried over MgSO<sub>4</sub>. After the solids were filtered off, the solvent was removed under reduced pressure and the residue was dried under vacuum. The contents other than **1e**-derived materials including 2,4-dibromo-3,5-bis(trifluoromethyl)aniline (**S1**) 2,6-dibromo-3,5-bis(trifluoromethyl)aniline (**S2**)<sup>S2</sup> in the residue were roughly removed by silica-gel column chromatography (eluent: hexane/EtOAc, 100:0 to 10:1) to afford a mixture containing **S1** and **S2** (*ca.* 1:1) as major products. The obtained red oil was used to the next step without further purification.

A 500 mL recovery flask was charged with 5 wt% Pd/C (2.13 g, 20.0 mmol, 1 mol% Pd) and dried by heating for 5 min using a heat gun under vacuum. After cooling to ambient temperature, the flask was evacuated and backfilled with nitrogen (three times). A solution of **S1** and **S2** in MeOH (200 mL) was injected to the flask and HCO<sub>2</sub>NH<sub>4</sub> (15.6 g, 250 mmol, 2.5 equiv) were added subsequently under a gentle stream of nitrogen, and the resulting mixture was stirred at 30 °C for 24 h. After cooling to room temperature, the reaction progress was monitored by TLC. The mixture was filtered through Celite<sup>®</sup> and all volatiles of the filtrate were removed under reduced pressure. The residual solids were dissolved in water (100 mL) and extracted with EtOAc (100 mL, 3 times). The combined organic layer was washed with water (100 mL, 3 times) and brine (30 mL, twice), and dried over MgSO<sub>4</sub>. After the solids were filtered off, the solvent was removed under reduced pressure and the residue was dried under vacuum to afford a mixture of 3,5-bis(trifluoromethyl)-4-bromoaniline (**S3**)<sup>S2aNa</sup> and **1e** (*ca.* 1:1), which was used without further purification.

Under air, to a 200 mL recovery flask containing the above mixture (*ca.* 50 mmol of **S3**) was added CuCN (11.2 g, 125 mmol, 2.5 equiv) and the solids were suspended in NMP (100 mL). The resulting mixture was stirred at 175 °C for 24 h before cooling to room temperature. After monitoring the reaction progress by TLC, the mixture was diluted with EtOAc and water. The precipitates were removed by filtration through Celite<sup>®</sup> and the filtrate was extracted with EtOAc (5 times).

The combined organic layer was washed with water (200 mL, 10 times) and brine (30 mL, 4 times), and dried over MgSO<sub>4</sub>. The solids were filtered off and the solvent was removed under reduced pressure and the residue was passed through a pad of silica gel (dry charge, eluent: hexane/EtOAc = 1:5), giving a mixture of 4-amino-2,6-bis(trifluoromethyl)benzotrile (**1g**) and **1e**. After concentration of the filtrate, the residual solids were washed with hexane to afford **1g** (9.40 g, 37 mmol, 37% in 3 steps) as brown solids. If necessary, **1g** can be further purified by silica-gel column chromatography or vacuum sublimation (*ca.* 20 Torr, *ca.* 130 °C), providing pale-yellow solids.

**<sup>1</sup>H NMR** (400 MHz, CD<sub>3</sub>CN): δ 5.67 (br s, 2H), 7.20 (s, 2H) ppm. The spectral data were consistent with the literature.<sup>S1</sup>

## (B-2) Preparation of 1,3-Diarylfornamidines

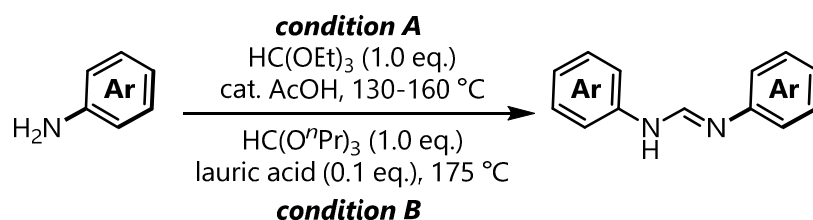

### 1,3-Di(4-methoxycarbonylphenyl)formamidine (**2aH**)<sup>S4</sup>

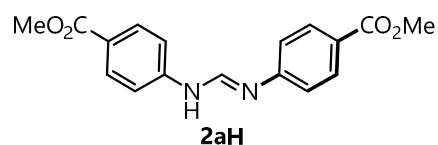

**Condition A:** Under air, to a 50 mL recovery flask were added Methyl 4-aminobenzoate (750 mg, 5.00 mmol, 2.0 equiv), triethyl orthoformate (371 mg, 2.50 mmol, 1.0 equiv), and AcOH (15.0 mg, 0.500 mmol, 0.1 equiv). The resulting mixture was stirred at 130 °C for 24 h before cooling to room temperature. The mixture was washed with toluene (3 mL, 3 times) and the solids were dried under vacuum to afford **2aH** (704.5 mg, 2.25 mmol, 90%) as pale-yellow solids.

**<sup>1</sup>H NMR** (400 MHz, DMSO-*d*<sub>6</sub>): δ 3.82 (s, 6H), 7.33 (s, 4H), 7.90 (d, *J* = 8.3 Hz, 4H), 8.45 (s, 1H), 10.4 (s, 1H) ppm. The spectral data were consistent with the literature.

### 1,3-Di(4-methanesulfonylphenyl)formamidine (**2bH**)<sup>S5</sup>

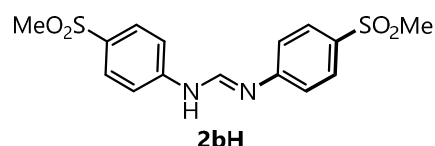

**Condition A:** Under air, to a 50 mL recovery flask were added 4-(methanesulfonyl)aniline (856 mg, 5.00 mmol, 2.0 equiv), triethyl orthoformate (371 mg, 2.50 mmol, 1.0 equiv), and AcOH (15.0 mg, 0.250 mmol, 0.1 equiv). The

resulting mixture was suspended in *p*-xylene (4 mL) was stirred at 130 °C for 24 h before cooling to room temperature. The mixture was washed with toluene (3 mL, 3 times) and the solids was dried under vacuum to afford **2bH** (858 mg, 2.43 mmol, 98%) as white solids.

**<sup>1</sup>H NMR** (400 MHz, DMSO-*d*<sub>6</sub>): δ 3.17 (s, 6H), 7.36-7.61 (br s, 4H), 7.83 (d, *J* = 8.3 Hz, 4H), 8.48 (br s, 1H), 10.5 (br s, 1H) ppm; **<sup>13</sup>C NMR** (101 MHz, DMSO-*d*<sub>6</sub>): δ 44.0, 119.3, 128.4, 134.3, 149.6 ppm; **IR** (KBr): ν 3492, 3343, 3013, 2921, 1685, 1585, 1499, 1304, 1145 cm<sup>-1</sup>; **HRMS** (ESI, negative, MeCN): *m/z* calcd. for C<sub>15</sub>H<sub>15</sub>N<sub>2</sub>O<sub>4</sub>S<sub>2</sub><sup>-</sup> [M-H]<sup>-</sup>: 351.0478, found: 351.0463; **Mp.**: 272.2–274.4 °C.

### 1,3-Di(4-cyanophenyl)formamidine (**2cH**)<sup>S6</sup>

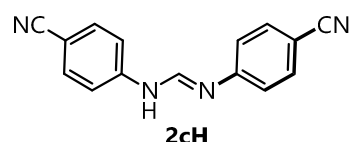

**Condition A:** Under air, to a 50 mL recovery flask were added 4-aminobenzotrile (1.18 g, 10.0 mmol, 2.0 equiv), triethyl orthoformate (741 mg, 5.00 mmol, 1.0 equiv), and AcOH (30.1 mg, 0.500 mmol, 0.1 equiv). The resulting mixture was stirred at 130 °C for 24 h

before cooling to room temperature. The mixture was washed with hexane (3 mL, 3 times) and the solids were dried under vacuum to afford **2cH** (1.21 g, 4.91 mmol, 98%) as yellow solids.



**<sup>1</sup>H NMR** (400 MHz, DMSO-*d*<sub>6</sub>): δ 7.41 (br s, 2H), 7.74 (d, *J* = 8.4 Hz, 4H), 8.45 (br s, 2H), 10.49 (br s, 1H) ppm; **<sup>13</sup>C NMR** (101 MHz, DMSO-*d*<sub>6</sub>): δ 104.5, 113.5, 119.4, 119.6, 133.4, 149.5 ppm; **IR** (KBr): ν 3477, 3326, 3074, 2224, 1667, 1580, 1498, 1314, 1209, 1179 cm<sup>-1</sup>; **HRMS** (ESI, negative, MeCN): *m/z* calcd. for C<sub>15</sub>H<sub>9</sub>N<sub>4</sub><sup>-</sup> [M-H]<sup>-</sup>: 245.0832, found: 245.0793.

### 1,3-Di(4-nitrophenyl)formamidine (2dH)<sup>S4</sup>

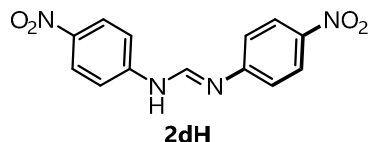

**Condition A:** Under air, to a 50 mL recovery flask were added 4-nitroaniline (1.38 g, 10.0 mmol, 2.0 equiv), triethyl orthoformate (741 mg, 5.00 mmol, 1.0 equiv), and AcOH (30.1 mg, 0.5 mmol, 0.1 equiv). The resulting mixture was suspended in *p*-xylene (4 mL) was stirred at 130 °C for 24 h before cooling to room temperature. The mixture was washed with toluene (3 mL, 3 times) and the solids was dried under vacuum to afford **2dH** (1.29 g, 4.53 mmol, 91 %) as white solids.

**<sup>1</sup>H NMR** (400 MHz, DMSO-*d*<sub>6</sub>): δ 7.49 (s, 4H), 8.21 (d, *J* = 8.3 Hz, 4H), 8.60 (s, 1H), 10.8 (s, 1H) ppm; **<sup>13</sup>C NMR** (100 MHz, DMSO-*d*<sub>6</sub>): δ 119.3 (br) , 125.1, 142.4, 159.8 ppm; **HRMS** (ESI, negative, MeCN): *m/z* calcd. for C<sub>13</sub>H<sub>9</sub>N<sub>4</sub>O<sub>4</sub><sup>-</sup> [M-H]<sup>-</sup> : 285.0629, found: 285.0614. The spectral data were consistent with the literature.

### 1,3-Di{3,5-bis(trifluoromethyl)phenyl}formamidine (2eH)<sup>S7</sup>

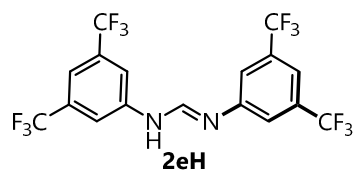

**Condition A:** Under air, to a 100 mL recovery flask were added 3,5-bis(trifluoromethyl)aniline (1.270 g, 5.0 mmol, 2.0 equiv), triethyl orthoformate (371 mg, 2.50 mmol, 1.0 equiv), and AcOH (15 mg, 0.25 mmol, 0.1 equiv). The resulting mixture was stirred at 130 °C for 24 h before cooling to room temperature. The mixture was washed with hexane (3 mL, 3 times) and the solids were dried under vacuum to afford **2eH** (901 mg, 1.92 mmol, 77%) as white solids.

**<sup>1</sup>H NMR** (400 MHz, Acetone-*d*<sub>6</sub>): δ 7.69 (br s, 4H), 8.01 (br s, 1H), 8.67 (br, s, 1H), 9.66 (br s, 1H) ppm; **HRMS** (ESI, negative, MeCN): *m/z* calcd. for C<sub>17</sub>H<sub>7</sub>F<sub>12</sub>N<sub>2</sub><sup>-</sup> [M-H]<sup>-</sup>: 467.0423, found: 467.0425. The spectral data were consistent with the literature.

### 1,3-Di{4-cyano-3-(trifluoromethyl)phenyl}formamidine (2fH)

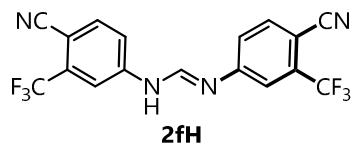

**Condition B:** Under air, to a 100 mL recovery flask were added 4-amino-2-(trifluoromethyl)benzonitrile (3.70 g, 19.9 mmol, 2.0 equiv), tri-*n*-propyl orthoformate (2.02 g, 10.0 mmol, 1.0 equiv), and lauric acid (200 mg, 1.00 mmol, 0.1 equiv). The resulting mixture was stirred at 170 °C for 24 h before cooling to room temperature. The mixture was washed with toluene and hexane (3 mL, 3 times for each) and the solids were dried under vacuum to afford **2fH** (3.29 g, 8.62 mmol, 86%) as pale-beige solids.

**<sup>1</sup>H NMR** (400 MHz, CD<sub>3</sub>CN): δ 7.62 (br s, 2H), 7.80 (br s, 2H), 7.89 (d, *J* = 8.8 Hz, 2H), 8.26 (br s, 1H) ppm; **<sup>13</sup>C NMR** (101 MHz, DMSO-*d*<sub>6</sub>): δ 101.3, 116.1, 117.4, 122.6 (q, <sup>1</sup>*J*<sub>CF</sub> = 274 Hz), 122.9, 132.1 (1, <sup>2</sup>*J*<sub>CF</sub> = 31.8 Hz), 136.5, 150.5, 151.3 ppm; **<sup>19</sup>F NMR** (376 MHz, CD<sub>3</sub>CN): δ -62.70 (s, 6F) ppm; **IR** (KBr): ν 3427, 3307, 3076, 2989, 2226, 1665, 1604, 1576, 1435, 1341, 1293, 1185, 1134 cm<sup>-1</sup>; **HRMS** (ESI, negative, MeCN): *m/z* calcd. for C<sub>17</sub>H<sub>7</sub>F<sub>6</sub>N<sub>4</sub><sup>-</sup> [M-H]<sup>-</sup>: 381.0580, found: 381.0583. **Mp.**: 268.2–270.0 °C.

### 1,3-Di{4-cyano-3,5-bis(trifluoromethyl)phenyl}formamidine (2gH)

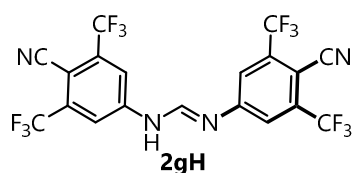

**Condition B:** Under air, to a 100 mL recovery flask were added 4-amino-2,6-bis(trifluoromethyl)benzonitrile (3.57 g, 14.0 mmol, 2.0 equiv), tri-*n*-propyl orthoformate (1.33 g, 7.00 mmol, 1.0 equiv), and lauric acid (140.2 mg, 0.700 mmol, 0.1 equiv). The resulting mixture was stirred at 170 °C for 24 h before cooling to room temperature. The

mixture was carefully washed with EtOAc (3 mL, 3 times) and the solids were dried under vacuum to afford **2gH** (2.35 g, 4.58 mmol, 65%) as beige solids.

**<sup>1</sup>H NMR** (400 MHz, CD<sub>3</sub>CN): δ 8.02 (br s, 4H), 8.37 (br s, 1H) ppm; **<sup>13</sup>C NMR** (101 MHz, DMSO-*d*<sub>6</sub>): δ 98.6, 112.6, 121.9 (q, <sup>1</sup>J<sub>CF</sub> = 275 Hz), 134.6 (q, <sup>2</sup>J<sub>CF</sub> = 31.8 Hz), 150.3, 152.9 ppm; **<sup>19</sup>F NMR** (376 MHz, CD<sub>3</sub>CN): δ -62.74 (s, 12F) ppm;

**IR** (KBr): ν 3432, 3323, 3088, 2239, 1674, 1605, 1524, 1478, 1372, 1294, 1215, 1188, 1166, 1139 cm<sup>-1</sup>;

**HRMS** (ESI, negative, MeCN): *m/z* calcd. for C<sub>19</sub>H<sub>5</sub>F<sub>12</sub>N<sub>4</sub><sup>-</sup> [M-H]: 517.0328, found: 517.0320; **Mp.**: 244.1–247.4 °C;

**X-ray data:** M = 518.28, block, colorless, triclinic, *P* $\bar{1}$  (#2), *a* = 8.2148(2) Å, *b* = 10.0468(3) Å, *c* = 11.6137(3) Å, α = 90.297(2)°, β = 102.341(2)°, γ = 93.315(2)°, *V* = 934.64(4) Å<sup>3</sup>, *Z* = 2, *D*<sub>calcd</sub> = 1.842 g/cm<sup>3</sup>, *T* = 100.01(10) K, *R*<sub>1</sub> (*wR*<sub>2</sub>) = 0.0306 (0.0822).

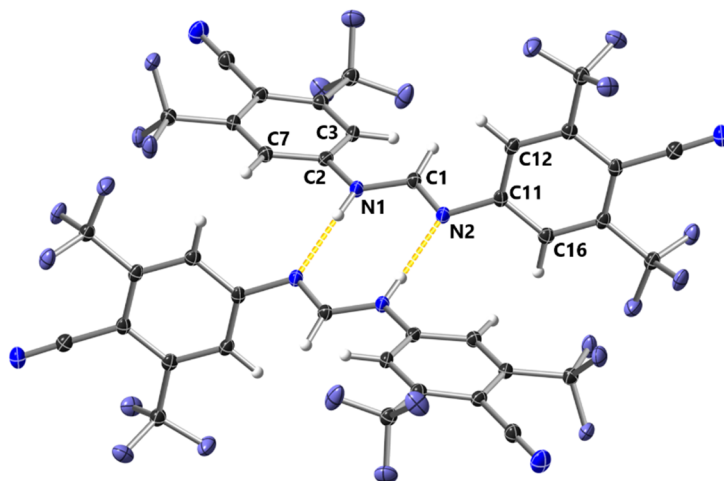

### (B-3) Deprotonation of Amidinates

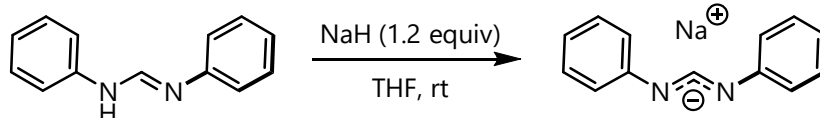

### Sodium 1,3-Di(4-methoxycarbonylphenyl)formamidinate (2aNa)

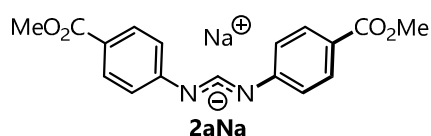

A 20 mL recovery flask containing **2aH** (312 mg, 1.00 mmol, 1.0 equiv) was taken into the N<sub>2</sub>-filled glove box and oil-free NaH (pre-washed with hexane, 28.8 mg, 1.20 mmol, 1.2 equiv) was added. The solids were suspended in THF (5 mL) and stirred at room temperature for 24 h. The mixture was filtered through Celite® and the cake was washed with THF. The filtrate was concentrated and dried under reduced pressure to furnish 0.4 THF adduct of **2aNa** (310 mg, 0.854 mmol, 85%) as moisture-sensitive yellow solids.

**<sup>1</sup>H NMR** (400 MHz, CD<sub>3</sub>CN): δ 1.75–1.85 (m, 2H), 3.59–3.68 (m, 2H), 3.79 (s, 6H), 6.99 (d, *J* = 8.8 Hz, 4H), 7.76 (d, *J* = 8.8 Hz, 4H), 8.93 (s, 1H) ppm; **<sup>13</sup>C NMR** (101 MHz, DMSO-*d*<sub>6</sub>): δ 25.2, 51.2, 67.1, 118.4, 119.3, 130.3, 159.5, 159.8, 166.7 ppm; **HRMS** (ESI, negative, MeCN): *m/z* calcd. for C<sub>17</sub>H<sub>15</sub>N<sub>2</sub>O<sub>4</sub><sup>-</sup> [M]: 311.1037, found: 311.1030.

### Sodium 1,3-Di(4-methanesulfonylphenyl)formamidinate (2bNa)

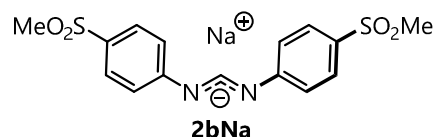

A 20 mL recovery flask containing **2bH** (352 mg, 1.00 mmol, 1.0 equiv) was taken into the N<sub>2</sub>-filled glove box and oil-free NaH (pre-washed with hexane, 28.8 mg, 1.20 mmol, 1.2 equiv) was added. The solids were suspended in THF (5 mL)

and stirred at room temperature for 24 h. The mixture was filtered through Celite® and the cake was washed with THF. The filtrate was concentrated and dried under reduced pressure to afford 0.6 THF adduct of **2bNa** (350 mg, 0.838 mmol, 84%) as moisture-sensitive yellow solids.

**<sup>1</sup>H NMR** (400 MHz, DMSO-*d*<sub>6</sub>): δ 1.75–1.85 (m, 2H), 2.98 (s, 6H), 3.59–3.68 (m, 2H), 7.12 (d, *J* = 8.7 Hz, 4H), 7.63 (d, *J* = 8.7 Hz, 4H), 8.91 (s, 1H) ppm; **<sup>13</sup>C NMR** (101 MHz, DMSO-*d*<sub>6</sub>): δ 25.1, 44.4, 67.0, 119.6, 127.9, 128.5, 159.5, 159.7 ppm; **HRMS** (ESI, negative, MeCN): *m/z* calcd. for C<sub>15</sub>H<sub>15</sub>N<sub>2</sub>O<sub>4</sub>S<sub>2</sub><sup>-</sup> [M]<sup>-</sup>: 351.0478, found: 351.0481.

#### Sodium 1,3-Di(4-cyanophenyl)formamidinate (**2cNa**)

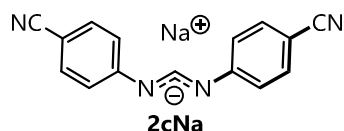

A 20 mL recovery flask containing **2cH** (98.5 mg, 0.400 mmol, 1.0 equiv) was taken into the N<sub>2</sub>-filled glove box and oil-free NaH (pre-washed with hexane, 11.5 mg, 0.480 mmol, 1.2 equiv) was added. The solids were suspended in THF (5 mL) and stirred at room temperature for 24 h. The mixture was filtered through Celite® and the cake was washed with THF. The filtrate was concentrated and dried under reduced pressure to afford 0.25 THF adduct of **2cNa** (74.0 mg, 0.258 mmol, 65%) as moisture-sensitive yellow-orange solids.

**<sup>1</sup>H NMR** (400 MHz, DMSO-*d*<sub>6</sub>): δ 1.75–1.80 (m, 1H), 3.58–3.63 (m, 1H), 6.98 (d, *J* = 8.4 Hz, 4H), 7.41 (d, *J* = 8.6 Hz, 4H), 8.45 (s, 1H) ppm; **<sup>13</sup>C NMR** (101 MHz, DMSO-*d*<sub>6</sub>): δ 25.1, 67.0, 98.5, 120.3, 120.9, 132.6, 158.4, 158.9 ppm; **HRMS** (ESI, negative, MeCN): *m/z* calcd. for C<sub>15</sub>H<sub>9</sub>N<sub>4</sub><sup>-</sup> [M]<sup>-</sup>: 245.0832, found: 245.0789.

#### Sodium 1,3-Di(4-nitrophenyl)formamidinate (**2dNa**)

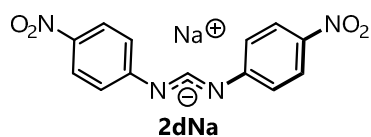

A 20 mL recovery flask containing **2dH** (286 mg, 1.00 mmol, 1.0 equiv) was taken into the N<sub>2</sub>-filled glove box and oil-free NaH (pre-washed with hexane, 28.8 mg, 1.20 mmol, 1.2 equiv) was added. The solids were suspended in THF (5 mL) and stirred at room temperature for 24 h. The mixture was filtered through Celite® and the cake was washed with THF. The filtrate was concentrated and dried under reduced pressure to give 0.25 THF adduct of **2dNa** (281 mg, 0.861 mmol, 86%) as purple solids.

**<sup>1</sup>H NMR** (400 MHz, DMSO-*d*<sub>6</sub>): δ 1.70–1.80 (m, 1H), 3.57–3.61 (m, 1H), 7.10 (d, *J* = 9.0 Hz, 4H), 8.00 (d, *J* = 9.0 Hz, 4H), 8.69 (s, 1H) ppm; **<sup>13</sup>C NMR** (101 MHz, DMSO-*d*<sub>6</sub>): δ 25.1, 67.0, 119.7, 125.1, 138.9, 158.4, 160.3 ppm; **IR** (KBr): ν 3544, 3179, 3103, 1660, 1579, 1523, 1300, 1108 cm<sup>-1</sup>; **HRMS** (ESI, negative, MeCN): *m/z* calcd. for C<sub>13</sub>H<sub>9</sub>N<sub>4</sub>O<sub>4</sub><sup>-</sup> [M]<sup>-</sup>: 285.0629, found: 285.0621. **Mp.**: 258.1–259.6 °C.

#### Sodium 1,3-Di{3,5-bis(trifluoromethyl)phenyl}formamidinate (**2eNa**)

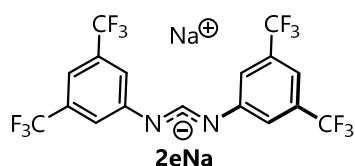

A 20 mL recovery flask containing **2eH** (187.2 mg, 0.400 mmol, 1.0 equiv) was taken into the N<sub>2</sub>-filled glove box and oil-free NaH (pre-washed with hexane, 11.5 mg, 0.480 mmol, 1.2 equiv) was added. The solids were suspended in THF (5 mL) and stirred at room temperature for 24 h. The mixture was filtered through Celite® and the cake was washed with THF. The filtrate was concentrated and dried under reduced pressure to give 1.0 THF adduct of **2eNa** (172 mg, 0.306 mmol, 76%) as moisture-sensitive off-white solids.

**<sup>1</sup>H NMR** (400 MHz, DMSO-*d*<sub>6</sub>): δ 1.70–1.81 (m, 4H), 3.57–3.67 (m, 4H), 7.14 (s, 2H), 7.51 (s, 4H), 8.34 (s, 1H) ppm; **<sup>13</sup>C NMR** (101 MHz, DMSO-*d*<sub>6</sub>): δ 25.1, 67.0, 109.5, 119.9, 124.0 (q, <sup>1</sup>J<sub>CF</sub> = 273 Hz), 130.3 (q, <sup>2</sup>J<sub>CF</sub> = 31.8 Hz), 156.4, 159.1 ppm; **<sup>19</sup>F NMR** (376 MHz, DMSO-*d*<sub>6</sub>): δ -61.32 (s, 12F) ppm; **HRMS** (ESI, negative, MeCN): *m/z* calcd. for C<sub>17</sub>H<sub>7</sub>F<sub>12</sub>N<sub>2</sub><sup>-</sup> [M]<sup>-</sup>: 467.0423, found: 467.0418.

### Sodium 1,3-Di{4-cyano-3-(trifluoromethyl)phenyl}formamidinate (2fNa)

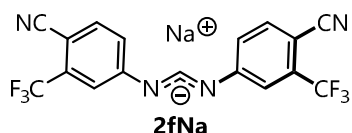

A 20 mL recovery flask containing **2fH** (765 mg, 2.00 mmol, 1.0 equiv) was taken into the N<sub>2</sub>-filled glove box and oil-free NaH (pre-washed with hexane, 57.6 mg, 2.40 mmol, 1.2 equiv) was added. The solids were suspended in THF (5 mL) and stirred at room temperature for 24 h. The mixture was filtered through Celite<sup>®</sup> and the cake was washed with THF. The filtrate was concentrated and dried under reduced pressure to give 0.25 THF adduct of **2fNa** (858 mg, 2.03 mmol, quant.) as moisture-sensitive brown solids.

**<sup>1</sup>H NMR** (400 MHz, DMSO-*d*<sub>6</sub>): δ 1.76–1.85 (m, 1H), 3.60–3.67 (m, 1H), 7.29 (d, *J* = 8.4 Hz, 2H), 7.33 (s, 2H), 7.69 (d, *J* = 8.4 Hz, 2H), 8.54 (s, 1H) ppm; **<sup>13</sup>C NMR** (101 MHz, DMSO-*d*<sub>6</sub>): δ 25.1, 67.0, 94.6, 117.6, 119.1, 123.1 (q, <sup>1</sup>*J*<sub>CF</sub> = 274 Hz), 122.3, 131.3 (q, <sup>2</sup>*J*<sub>CF</sub> = 24.7 Hz), 135.5, 159.2, 159.9 ppm; **<sup>19</sup>F NMR** (376 MHz, DMSO-*d*<sub>6</sub>): δ -60.95 (s, 6F) ppm; **HRMS** (ESI, negative, MeCN): *m/z* calcd. for C<sub>17</sub>H<sub>7</sub>F<sub>6</sub>N<sub>4</sub><sup>-</sup> [M]<sup>-</sup>: 381.0580, found: 381.0577.

### Sodium 1,3-Di{4-cyano-3,5-bis(trifluoromethyl)phenyl}formamidinate (2gNa)

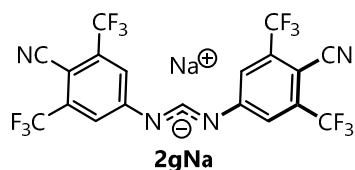

A 20 mL recovery flask containing **2gH** (1.04 g, 2.00 mmol, 1.0 equiv) was taken into the N<sub>2</sub>-filled glove box and oil-free NaH (pre-washed with hexane, 57.6 mg, 2.40 mmol, 1.2 equiv) was added. The solids were suspended in THF (5 mL) and stirred at room temperature for 24 h. The mixture was filtered through Celite<sup>®</sup> and the cake was washed

with THF. The filtrate was concentrated and dried under reduced pressure to give **2gNa** (1.08 g, 1.99 mmol, 99%) as yellow solids. Single crystals suitable for X-ray crystallography were prepared by slow diffusion of hexane into a THF solution under air.

**<sup>1</sup>H NMR** (400 MHz, CD<sub>3</sub>CN): δ 7.84 (s, 4H), 8.55 (s, 1H) ppm; **<sup>13</sup>C NMR** (101 MHz, DMSO-*d*<sub>6</sub>): δ 91.4, 114.0, 121.1 (app. q, <sup>3</sup>*J*<sub>CF</sub> = 1.5 Hz), 122.5 (q, <sup>1</sup>*J*<sub>CF</sub> = 275 Hz), 134.0 (q, <sup>2</sup>*J*<sub>CF</sub> = 31.2 Hz), 159.1, 160.7 ppm; **<sup>19</sup>F NMR** (376 MHz, CD<sub>3</sub>CN): δ -62.76 (s, 12F) ppm; **IR** (KBr): ν 3484, 3372, 3247, 2240, 2230, 1676, 1611, 1513, 14004, 1324, 1289, 1215, 1190, 1131 cm<sup>-1</sup>; **HRMS** (ESI, negative, CH<sub>3</sub>CN): *m/z* calcd. for C<sub>19</sub>H<sub>5</sub>F<sub>12</sub>N<sub>4</sub><sup>-</sup> [M]<sup>-</sup>: 517.0328, found: 517.0304; **Mp.**: >290 °C; **X-ray data**: *M* = 1404.97, block, yellow, triclinic, *P*  $\bar{1}$  (#2), *a* = 10.1787(12) Å, *b* = 11.7677(17) Å, *c* = 14.651(2) Å, α = 73.314(5)°, β = 73.689(5)°, γ = 72.357(5)°, *V* = 1565.4(4) Å<sup>3</sup>, *Z* = 1, *D* = 1.490 g/cm<sup>3</sup>, *T* = 293(2) K, *R*<sub>1</sub> (*wR*<sub>2</sub>) = 0.0587 (0.1570).

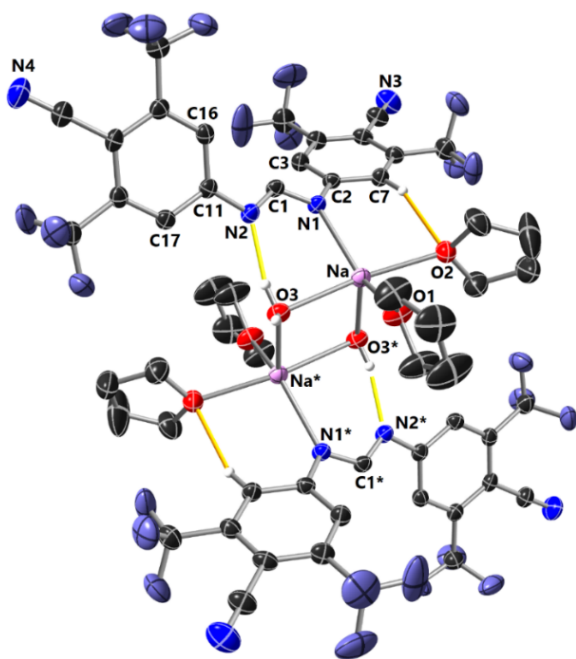

### Lithium 1,3-Di{4-cyano-3,5-bis(trifluoromethyl)phenyl}formamidinate (**2gLi**)

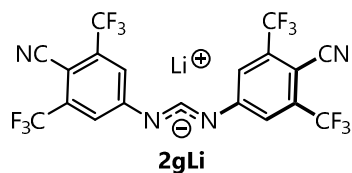

A 20 mL recovery flask containing **2gH** (155 mg, 0.300 mmol, 1.0 equiv) was taken into the N<sub>2</sub>-filled glove box and LiH (2.86 mg, 0.360 mmol, 1.2 equiv) was added. The solids were then suspended in THF (3 mL) and stirred at room temperature for 24 h. The mixture was filtered through Celite® and the cake was washed with THF. The filtrate was

concentrated and dried under reduced pressure to give 1.0 THF adduct of **2gLi** (164 mg, 0.275 mmol, 92%) as yellow solids. **<sup>1</sup>H NMR** (400 MHz, DMSO-*d*<sub>6</sub>): δ 1.72–1.80 (m, 4H), 3.57–3.62 (m, 4H), 7.66 (s, 4H), 8.65 (s, 1H) ppm; **<sup>13</sup>C NMR** (101 MHz, DMSO-*d*<sub>6</sub>): δ 25.1, 67.0, 91.2, 114.0, 121.0, 122.5 (q, <sup>1</sup>J<sub>CF</sub> = 275 Hz), 133.9 (q, <sup>2</sup>J<sub>CF</sub> = 30.9 Hz), 159.2, 160.5 ppm; **<sup>19</sup>F NMR** (376 MHz, CD<sub>3</sub>CN): δ -62.73 (s, 12F) ppm; **IR** (KBr): ν 3483, 3372, 3247, 2248, 2229, 1675, 1610, 1511, 1403, 1327, 1287, 1215, 1188, 1132 cm<sup>-1</sup>; **HRMS** (ESI, negative, MeCN): *m/z* calcd. for C<sub>19</sub>H<sub>5</sub>F<sub>12</sub>N<sub>4</sub><sup>-</sup> [M]: 517.0328, found: 517.0317; **Mp.**: 244.2–246.3 °C.

### (1,4,7,10,13-Pentaoxacyclopentadecane)sodium (**2gNa(15c5)**)

### 1,3-Di{4-cyano-3,5-bis(trifluoromethyl)phenyl}formamidinate

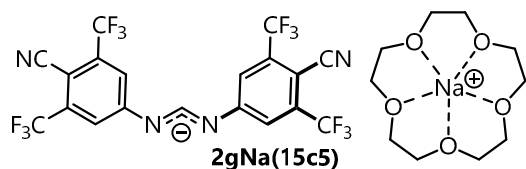

A 20 mL recovery flask containing **2gNa** (540.2 mg, 1.00 mmol, 1.0 equiv) was taken into the N<sub>2</sub>-filled glove box and 15-crown-5 (220 mg, 1.00 mmol, 1.00 equiv) was added. The solids were then suspended in THF (4 mL) and stirred at room temperature for 24 h. The mixture was

concentrated and dried under reduced pressure to afford **2gNa(15c5)** (757 mg, 0.99 mmol, 99%) as yellow solids.

**<sup>1</sup>H NMR** (400 MHz, CD<sub>3</sub>CN): δ 3.61 (s, 24H), 7.70 (s, 4H), 8.63 (s, 1H) ppm; **<sup>13</sup>C NMR** (101 MHz, DMSO-*d*<sub>6</sub>): δ 69.2, 91.6, 113.9, 120.9, 122.5 (q, <sup>1</sup>J<sub>CF</sub> = 275 Hz), 133.9 (q, <sup>2</sup>J<sub>CF</sub> = 30.8 Hz), 158.7, 160.5 ppm; **<sup>19</sup>F NMR** (376 MHz, CD<sub>3</sub>CN): δ -61.14 (s, 12F) ppm; **IR** (KBr): ν 3440, 3246, 2909, 2222, 1659, 1498, 1355, 1299, 1181, 1136 cm<sup>-1</sup>; **HRMS** (ESI, positive, MeCN): *m/z* calcd. for C<sub>10</sub>H<sub>20</sub>O<sub>5</sub>Na<sup>+</sup> [M]<sup>+</sup>: 243.1203, found: 243.1199; (ESI, negative, MeCN): *m/z* calcd. for C<sub>19</sub>H<sub>5</sub>F<sub>12</sub>N<sub>4</sub><sup>-</sup> [M]: 517.0328, found: 517.0300; **Mp.**: 128.2–130.4 °C.

### Potassium 1,3-Di{4-cyano-3,5-bis(trifluoromethyl)phenyl}formamidinate (**2gK**)

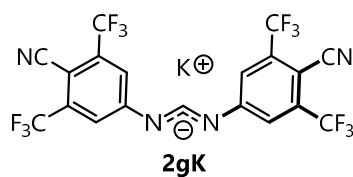

A 20 mL recovery flask containing **2gH** (77.7 mg, 0.150 mmol, 1.0 equiv) was taken into the N<sub>2</sub>-filled glove box and KH (7.21 mg, 0.180 mmol, 1.2 equiv) was added. The solids were then suspended in THF (1 mL) and stirred at room temperature for 24 h. The mixture was filtered through Celite® and the cake was washed with THF. The filtrate was

concentrated and dried under reduced pressure to give adduct of **2gK** (82.1 mg, 0.148 mmol, 98%) as yellow solids.

**<sup>1</sup>H NMR** (400 MHz, DMSO-*d*<sub>6</sub>): δ 7.68 (s, 4H), 8.67 (s, 1H) ppm; **<sup>13</sup>C NMR** (101 MHz, DMSO-*d*<sub>6</sub>): δ 91.8, 113.9, 121.0, 122.5 (q, <sup>1</sup>J<sub>CF</sub> = 275 Hz), 134.0 (q, <sup>2</sup>J<sub>CF</sub> = 31.8 Hz), 158.5, 160.1 ppm; **<sup>19</sup>F NMR** (376 MHz, CD<sub>3</sub>CN): δ -62.70 (s, 12F) ppm; **IR** (KBr): ν 3483, 3372, 2227, 1674, 1605, 1509, 1323, 1297, 1216, 1185, 1133 cm<sup>-1</sup>; **HRMS** (ESI, negative, CH<sub>3</sub>CN): *m/z* calcd. for C<sub>19</sub>H<sub>5</sub>F<sub>12</sub>N<sub>4</sub><sup>-</sup> [M]: 517.0328, found: 517.0310. **Mp.**: >275 °C (decomp.).

### 1,8-Diazabicyclo[5.4.0]undec-7-en-8-ium 1,3-Di{4-cyano-3,5-bis(trifluoromethyl)phenyl}formamidinate (**2gHdbu**)

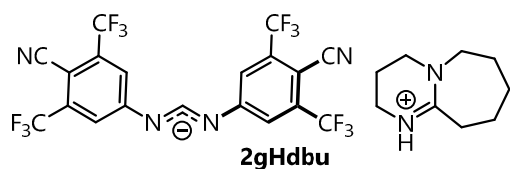

A 20 mL recovery flask containing **2gH** (518 mg, 1.00 mmol, 1.0 equiv) was taken into the N<sub>2</sub>-filled glove box and anhydrous DBU (152 mg, 1.00 mmol, 1.0 equiv) was added. The solids were suspended in THF (5 mL) and stirred at room temperature for 24 h. The mixture was concentrated and

dried under reduced pressure to give 0.2 THF adduct of **2gHdbu** (565 mg, 0.844 mmol, 84%) as yellow solids.

**<sup>1</sup>H NMR** (400 MHz, DMSO-*d*<sub>6</sub>): δ 1.57–1.70 (m, 6H), 1.73–1.78 (m, 0.8H), 1.86–1.91 (m, 2H), 2.57–2.60 (m, 2H), 3.23 (t, *J* = 5.7 Hz, 2H), 3.44 (t, *J* = 5.7 Hz, 2H), 3.49–3.51 (m, 2H), 3.57–3.61 (m, 0.8H), 7.66 (s, 4H), 8.65 (s, 1H) ppm; **<sup>13</sup>C NMR** (100 MHz, DMSO-*d*<sub>6</sub>): δ 19.1, 23.5, 25.1, 26.1, 28.3, 32.1, 38.1, 47.9, 53.3, 67.0, 91.3, 114.0, 121.0, 122.5 (q, <sup>1</sup>*J*<sub>CF</sub> = 272 Hz), 133.9 (q, <sup>2</sup>*J*<sub>CF</sub> = 30.6 Hz), 159.1, 160.5, 164.9 ppm; **<sup>19</sup>F NMR** (376 MHz, CD<sub>3</sub>CN): δ -62.67 (s, 12F) ppm; **IR** (KBr): ν 3410, 3204, 2942, 2223, 1648, 1516, 1356, 1323, 1283, 1204, 1179, 1130 cm<sup>-1</sup>; **HRMS** (ESI, negative, MeCN): *m/z* calcd. for C<sub>19</sub>H<sub>5</sub>F<sub>12</sub>N<sub>4</sub><sup>-</sup> [M]: 517.0328, found: 517.0294; **Mp.**: 118.2–122.5 °C.

### (C) Cyclic Voltammetry (CV)

**2gNa** exhibited irreversible oxidation upon measurements. The voltammograms suggested decomposition of **2gNa**.

Conditions for the CV measurements using **2gNa**:

Reference: Ag/Ag<sup>+</sup> (AgNO<sub>3</sub>)

Electrodes: Pt/C

Solvent: MeCN

Electrolyte: TBAPF<sub>6</sub> (0.1 M)

Concentration: 1.0 × 10<sup>-3</sup> M

Range: -1.5~+2.0 V (vs. SCE)

Result:

Resting potential: -0.94 V (vs. SCE)

*E*<sub>ox</sub> = +0.23 (1<sup>st</sup> cycle), +0.14 V (2<sup>nd</sup> and 3<sup>rd</sup> cycles), +1.15 (1<sup>st</sup> cycle), +1.10 V (2<sup>nd</sup> and 3<sup>rd</sup> cycles) (vs. SCE)

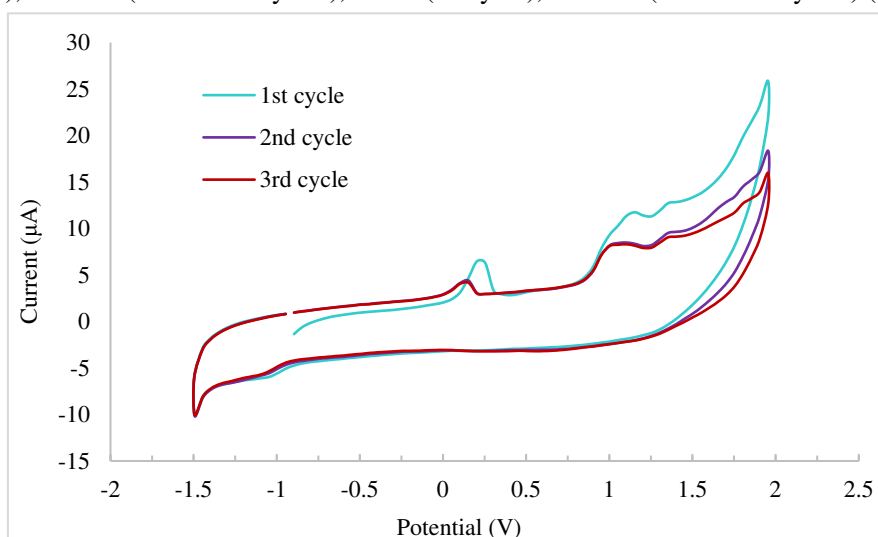

**Figure S1.** Cyclic voltammogram of **2gNa**.

## (D) Absorption & Emission Properties

For **2aH** and **2aNa**:

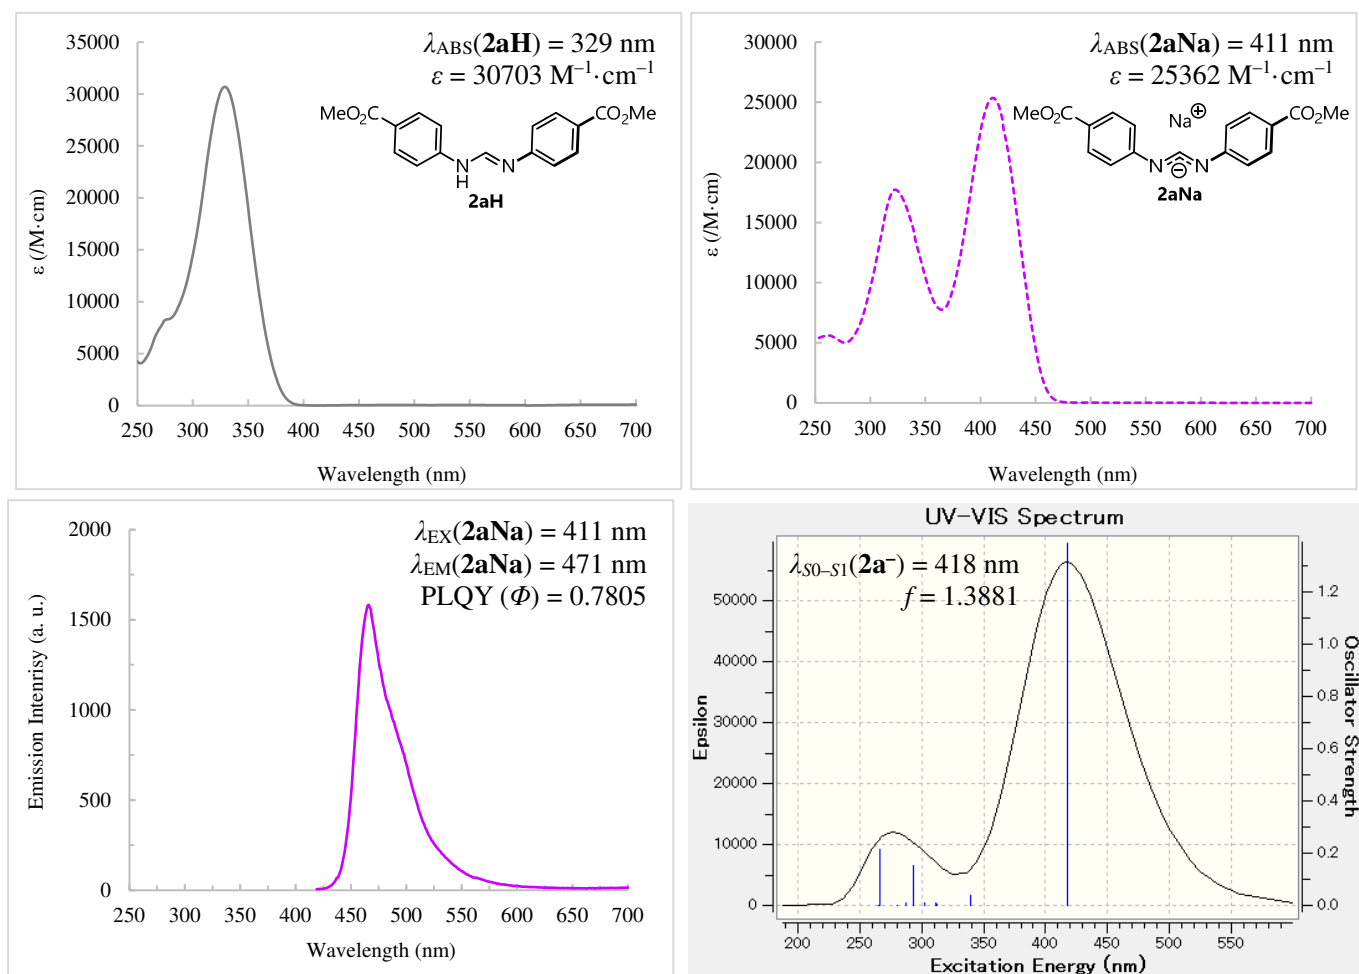

**Figure S2.** (Top, left) UV-Vis absorption spectrum of **2aH** in THF ( $1.0 \times 10^{-5} \text{ M}$ ). (Top, right) UV-Vis absorption spectra of **2aNa** in THF ( $1.0 \times 10^{-4} \text{ M}$ ). (Bottom, left) emission spectra of **2aNa** in THF ( $1.0 \times 10^{-4} \text{ M}$ ). (Bottom, right) DFT-based simulation of UV-Vis spectrum, the excitation energies, and the oscillator strengths for the optimized geometry of **2a-**.

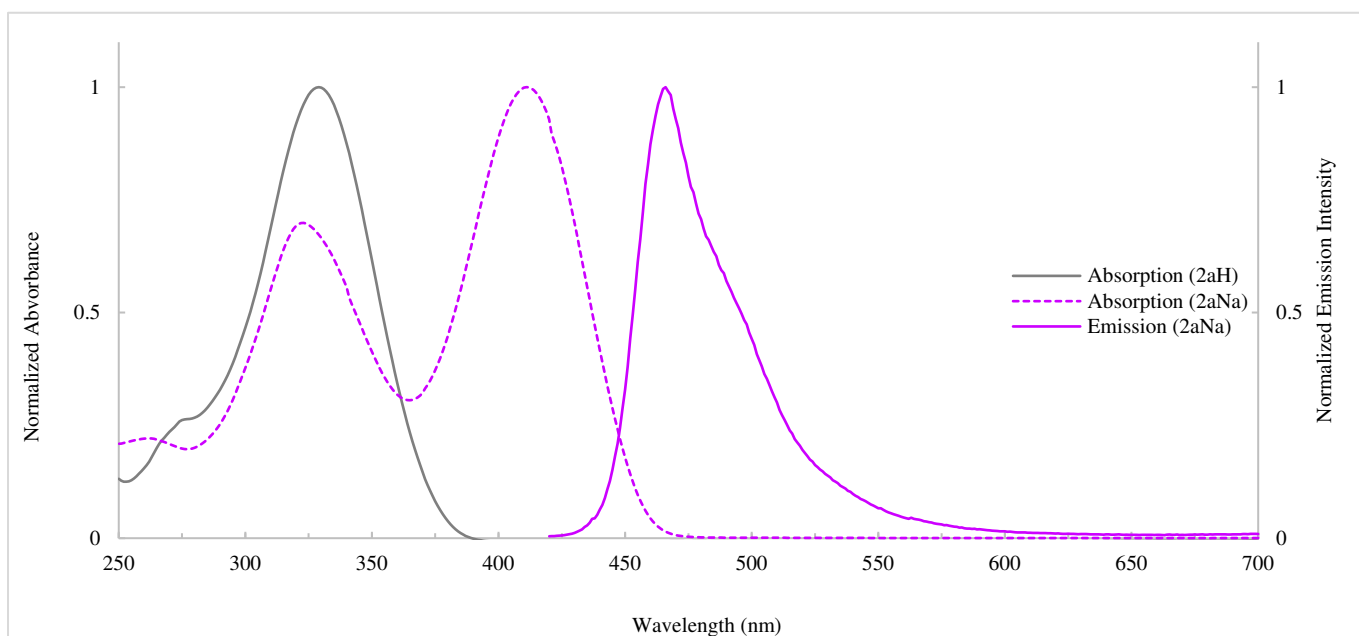

**Figure S3.** Normalized absorption and emission spectra of **2aH** and **2aNa** in THF.

For **2bH** and **2bNa**:

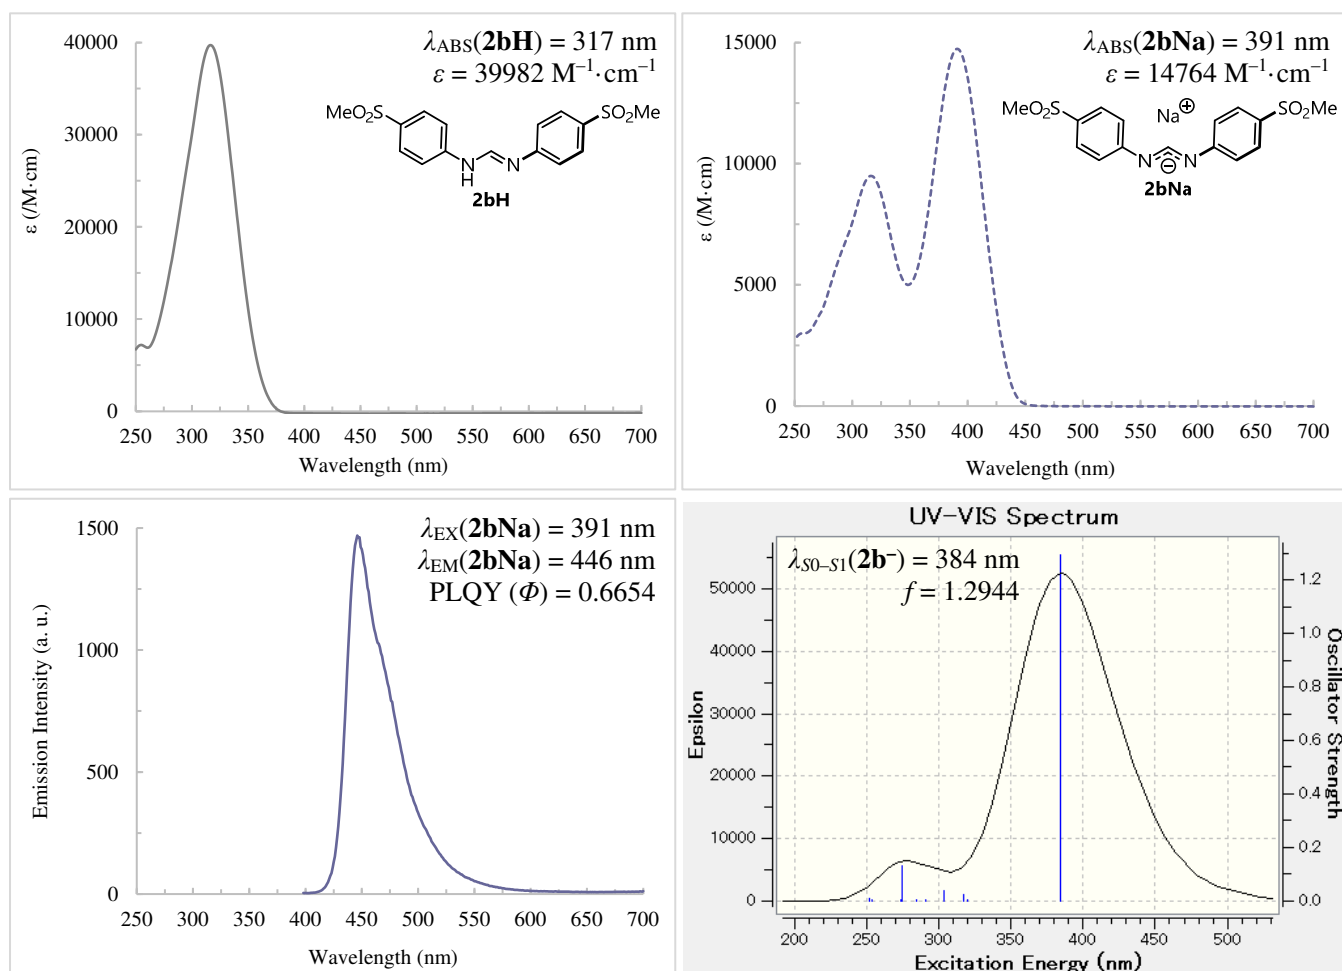

**Figure S4.** (Top, left) UV-Vis absorption spectrum of **2bH** in THF ( $1.0 \times 10^{-5} \text{ M}$ ). (Top, right) UV-Vis absorption spectra of **2bNa** in THF ( $1.0 \times 10^{-4} \text{ M}$ ). (Bottom, left) emission spectra of **2bNa** in THF ( $1.0 \times 10^{-4} \text{ M}$ ). (Bottom, right) DFT-based simulation of UV-Vis spectrum, the excitation energies, and the oscillator strengths for the optimized geometry of **2b-**.

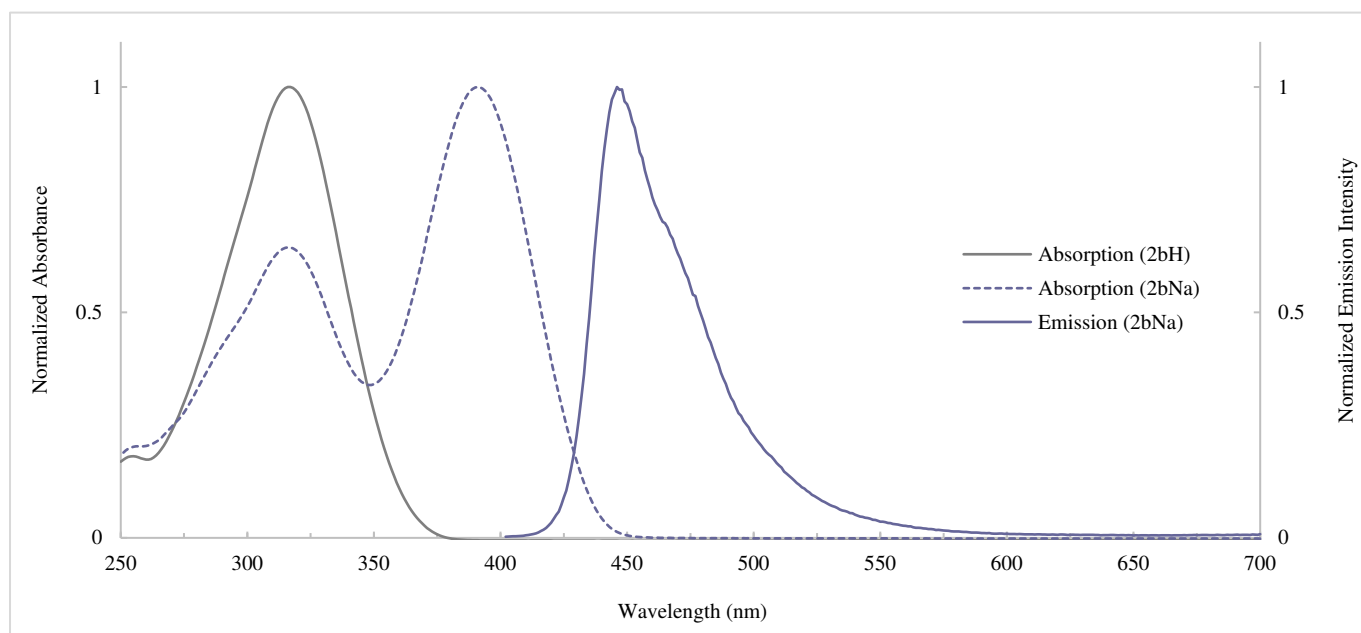

**Figure S5.** Normalized absorption and emission spectra of **2bH** and **2bNa** in THF.



For **2cH** and **2cNa**:

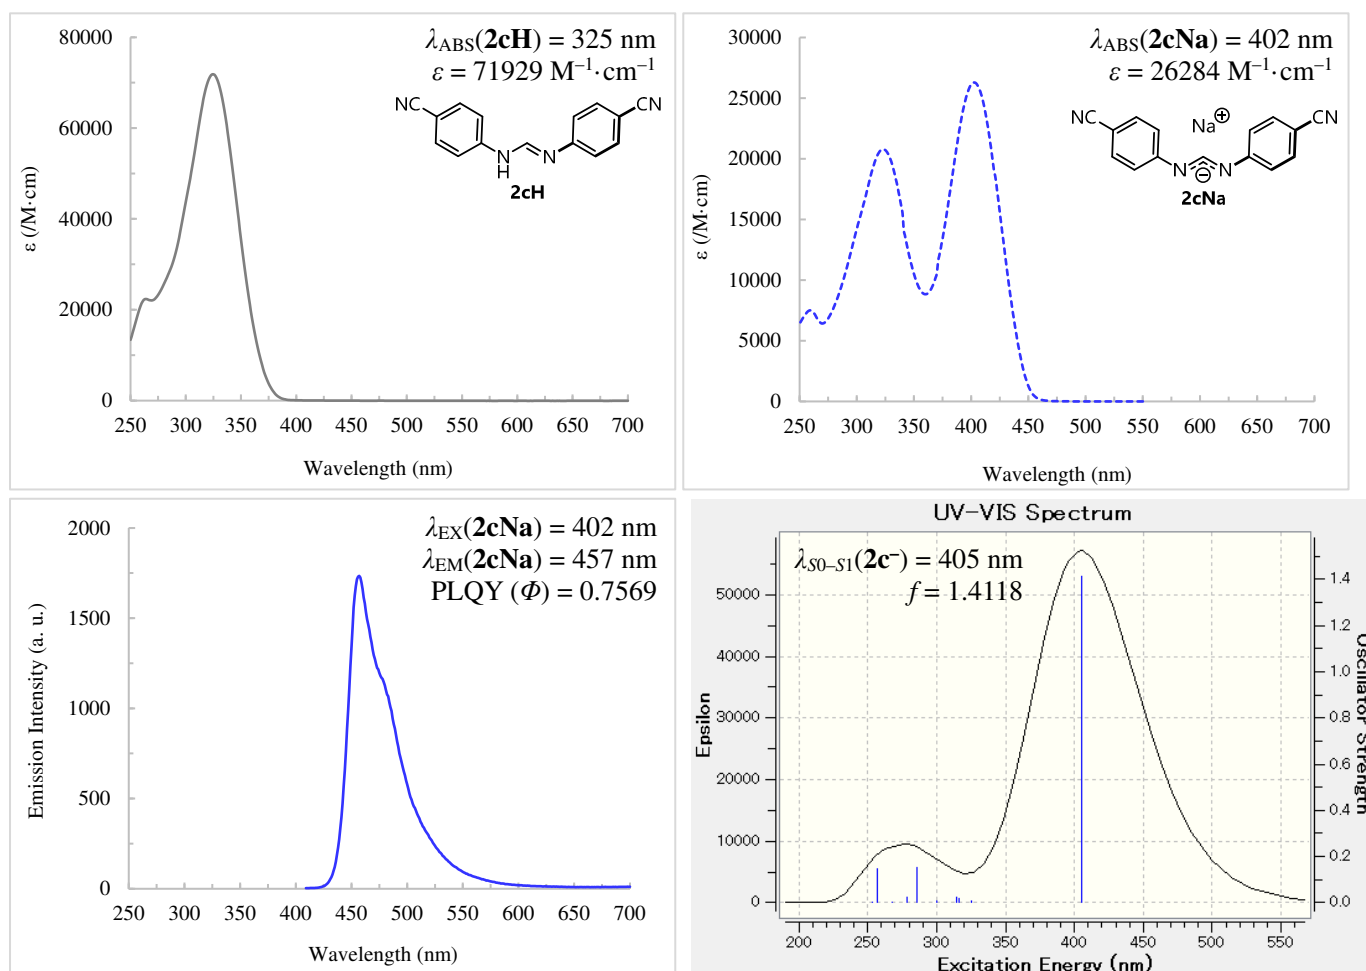

**Figure S6.** (Top, left) UV-Vis absorption spectrum of **2cH** in THF ( $1.0 \times 10^{-5} \text{ M}$ ). (Top, right) UV-Vis absorption spectra of **2cNa** in THF ( $1.0 \times 10^{-4} \text{ M}$ ). (Bottom, left) emission spectra of **2cNa** in THF ( $1.0 \times 10^{-4} \text{ M}$ ). (Bottom, right) DFT-based simulation of UV-Vis spectrum, the excitation energies, and the oscillator strengths for the optimized geometry of **2c<sup>-</sup>**.

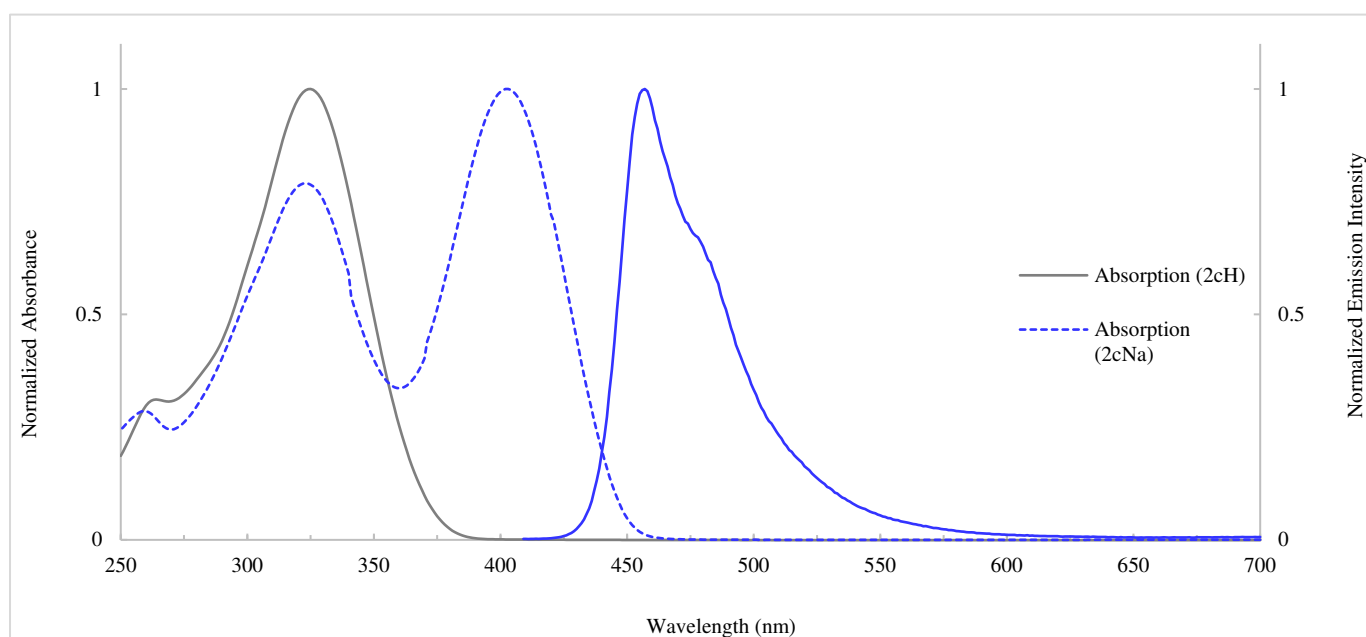

**Figure S7.** Normalized absorption and emission spectra of **2cH** and **2cNa** in THF.

For **2dH** and **2dNa**:

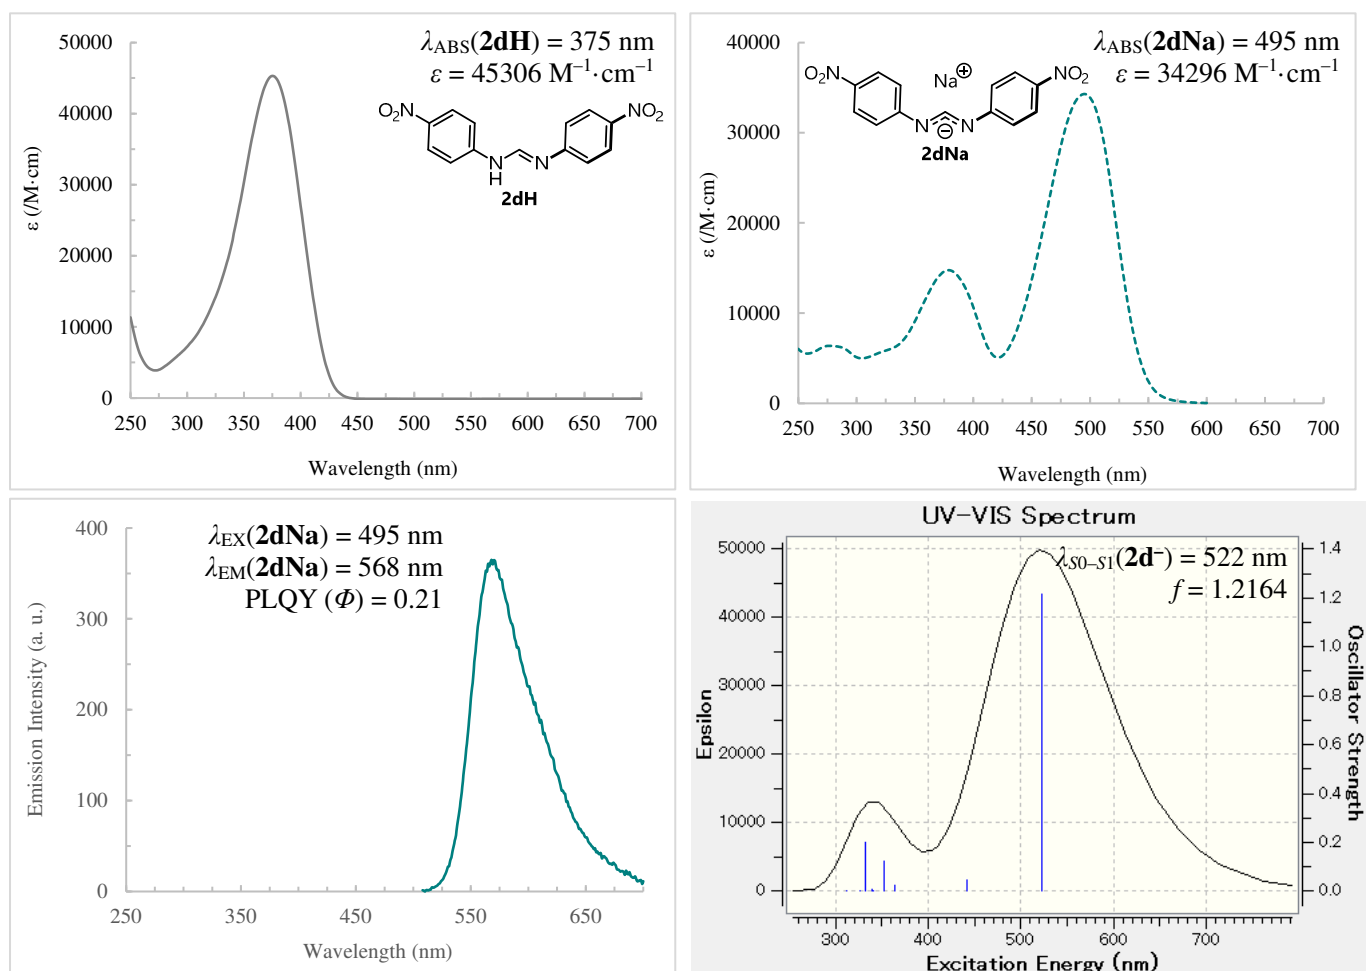

**Figure S8.** (Top, left) UV-Vis absorption spectrum of **2dH** in THF (1.0 × 10<sup>-5</sup> M). (Top, right) UV-Vis absorption spectra of **2dNa** in THF (1.0 × 10<sup>-4</sup> M). (Bottom, left) emission spectra of **2dNa** in THF (1.0 × 10<sup>-4</sup> M). (Bottom, right) DFT-based simulation of UV-Vis spectrum, the excitation energies, and the oscillator strengths for the optimized geometry of **2d<sup>-</sup>**.

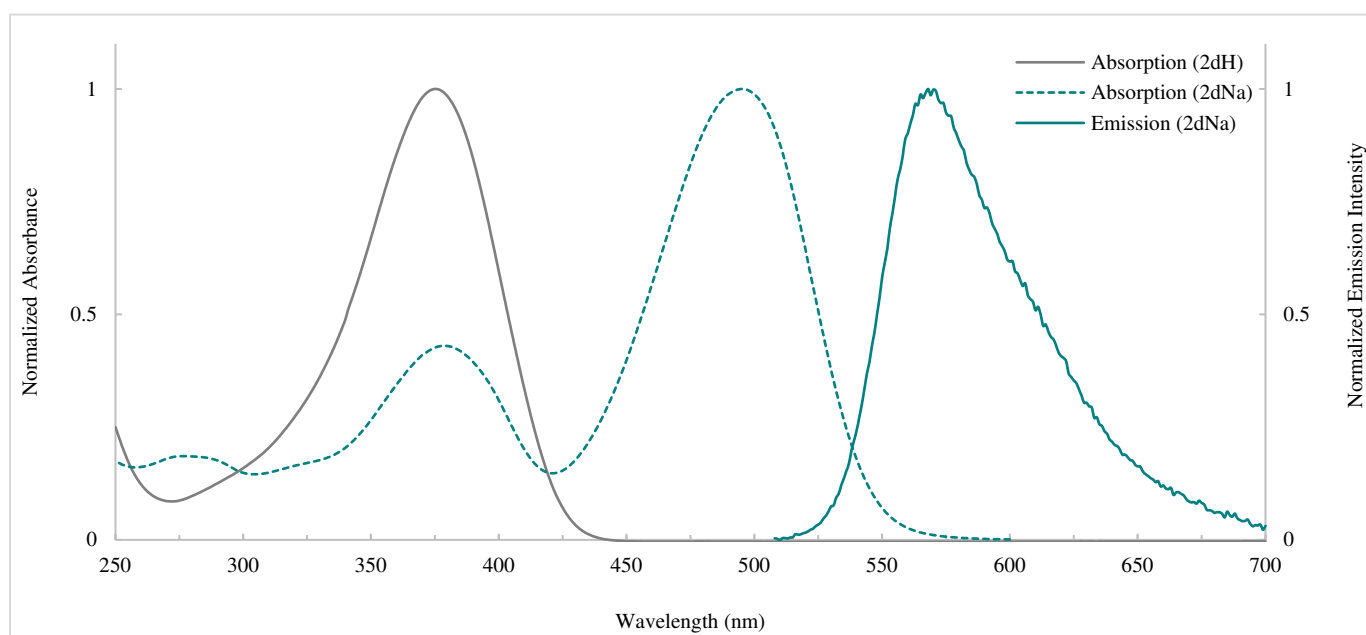

**Figure S9.** Normalized absorption and emission spectra of **2dH** and **2dNa** in THF.

For **2eH** and **2eNa**:

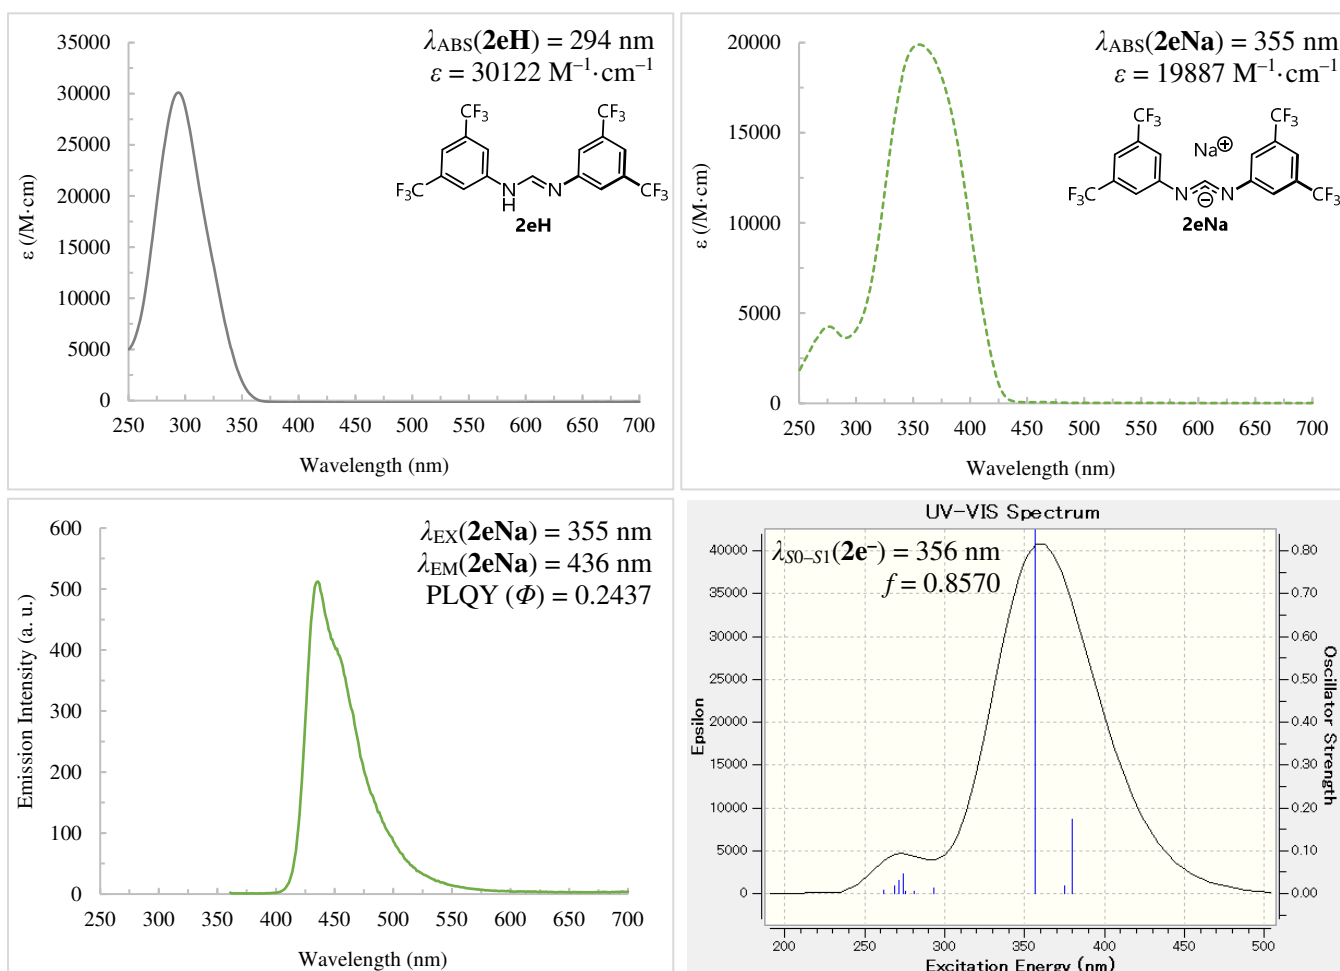

**Figure S10.** (Top, left) UV-Vis absorption spectrum of **2eH** in THF ( $1.0 \times 10^{-5}$  M). (Top, right) UV-Vis absorption spectra of **2eNa** in THF ( $1.0 \times 10^{-4}$  M). (Bottom, left) emission spectra of **2eNa** in THF ( $1.0 \times 10^{-4}$  M). (Bottom, right) DFT-based simulation of UV-Vis spectrum, the excitation energies, and the oscillator strengths for the optimized geometry of **2e<sup>-</sup>**.

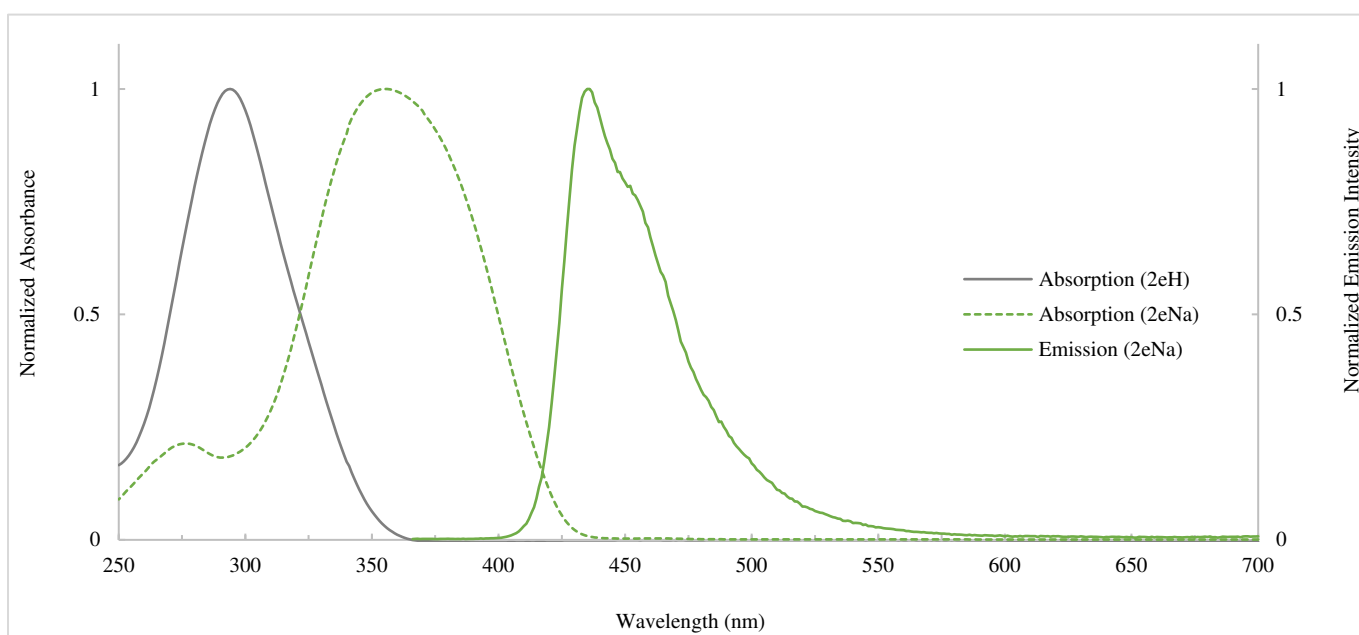

**Figure S11.** Normalized absorption and emission spectra of **2eH** and **2eNa** in THF.

For **2fH** and **2fNa**:

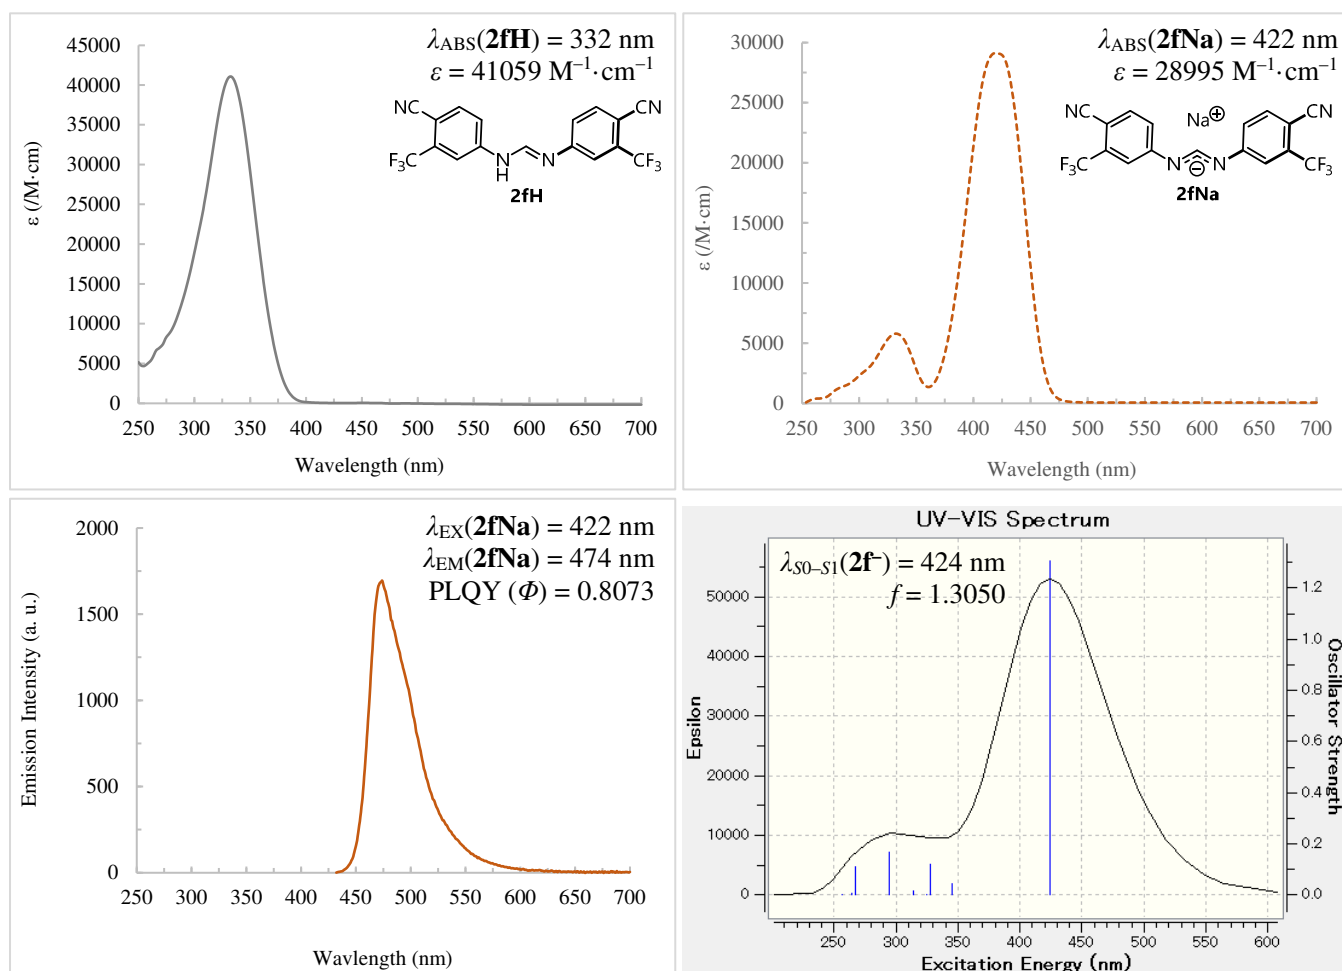

**Figure S12.** (Top, left) UV-Vis absorption spectrum of **2fH** in THF ( $1.0 \times 10^{-5} \text{ M}$ ). (Top, right) UV-Vis absorption spectra of **2fNa** in THF ( $1.0 \times 10^{-4} \text{ M}$ ). (Bottom, left) emission spectra of **2fNa** in THF ( $1.0 \times 10^{-4} \text{ M}$ ). (Bottom, right) DFT-based simulation of UV-Vis spectrum, the excitation energies, and the oscillator strengths for the optimized geometry of **2f-**.

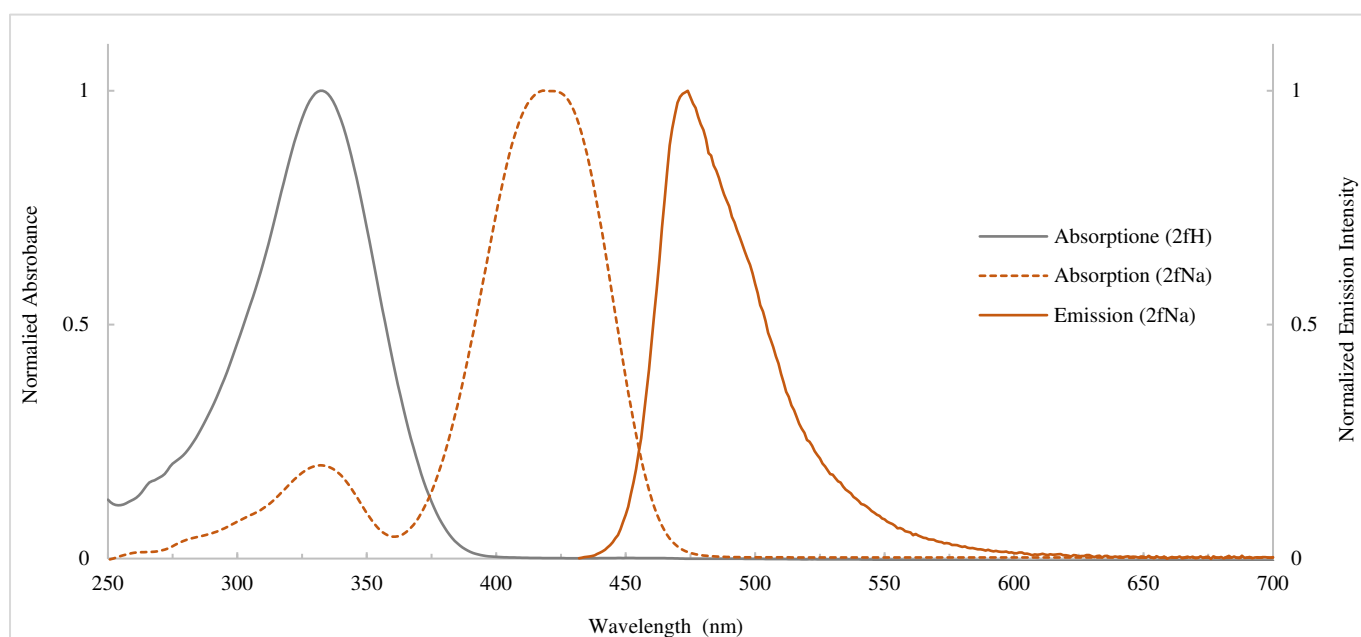

**Figure S13.** Normalized absorption and emission spectra of **2fH** and **2fNa** in THF.

For **2gH** and **2gNa**:

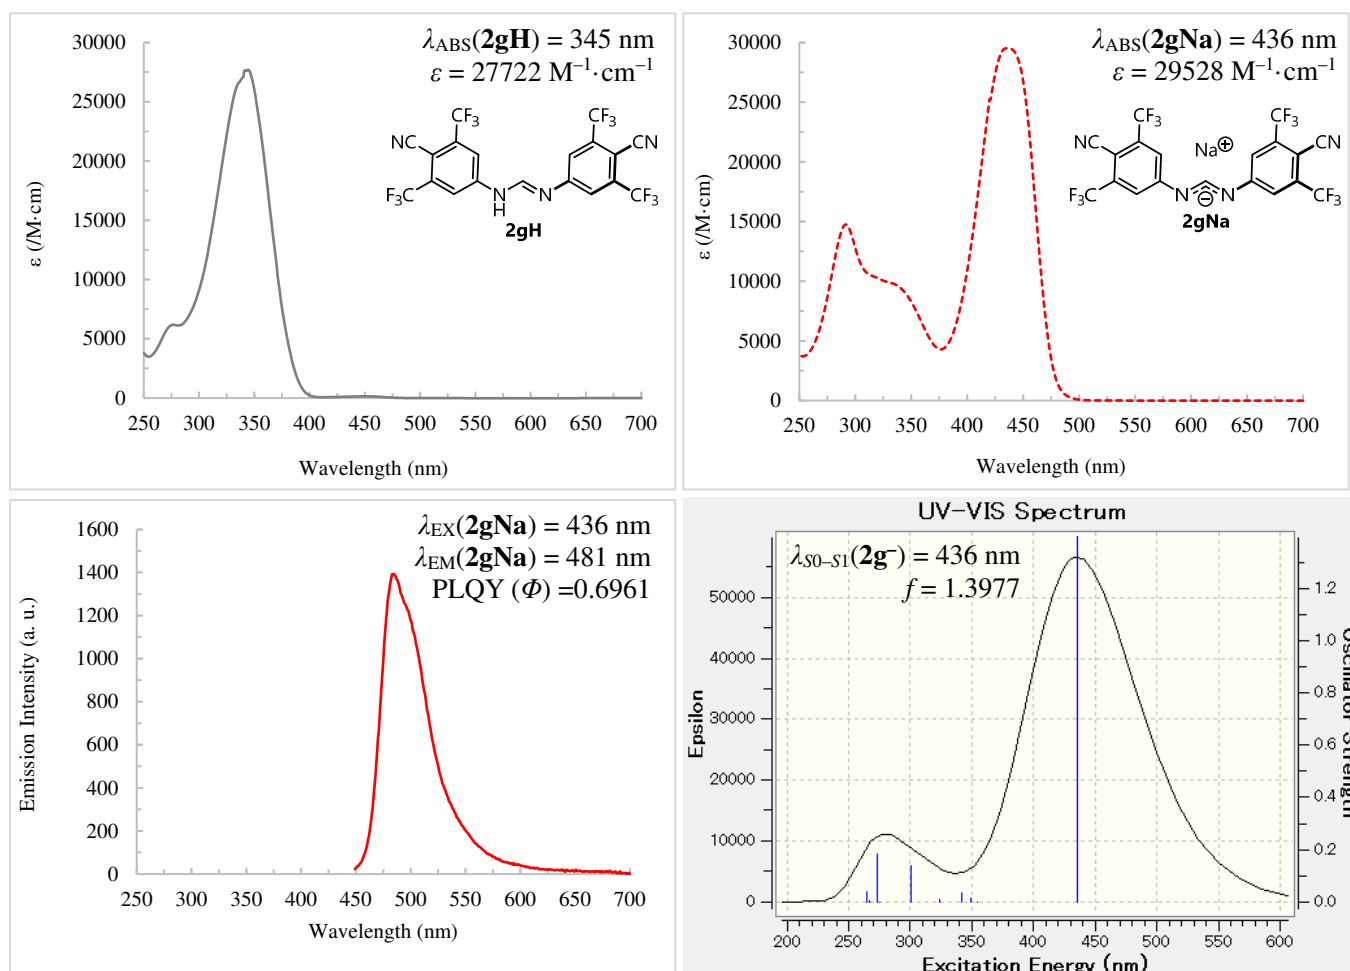

**Figure S14.** (Top, left) UV-Vis absorption spectrum of **2gH** in THF ( $1.0 \times 10^{-5}$  M). (Top, right) UV-Vis absorption spectra of **2gNa** in THF ( $1.0 \times 10^{-4}$  M). (Bottom, left) emission spectra of **2gNa** in THF ( $1.0 \times 10^{-4}$  M). (Bottom, right) DFT-based simulation of UV-Vis spectrum, the excitation energies, and the oscillator strengths for the optimized geometry of **2g<sup>-</sup>**.

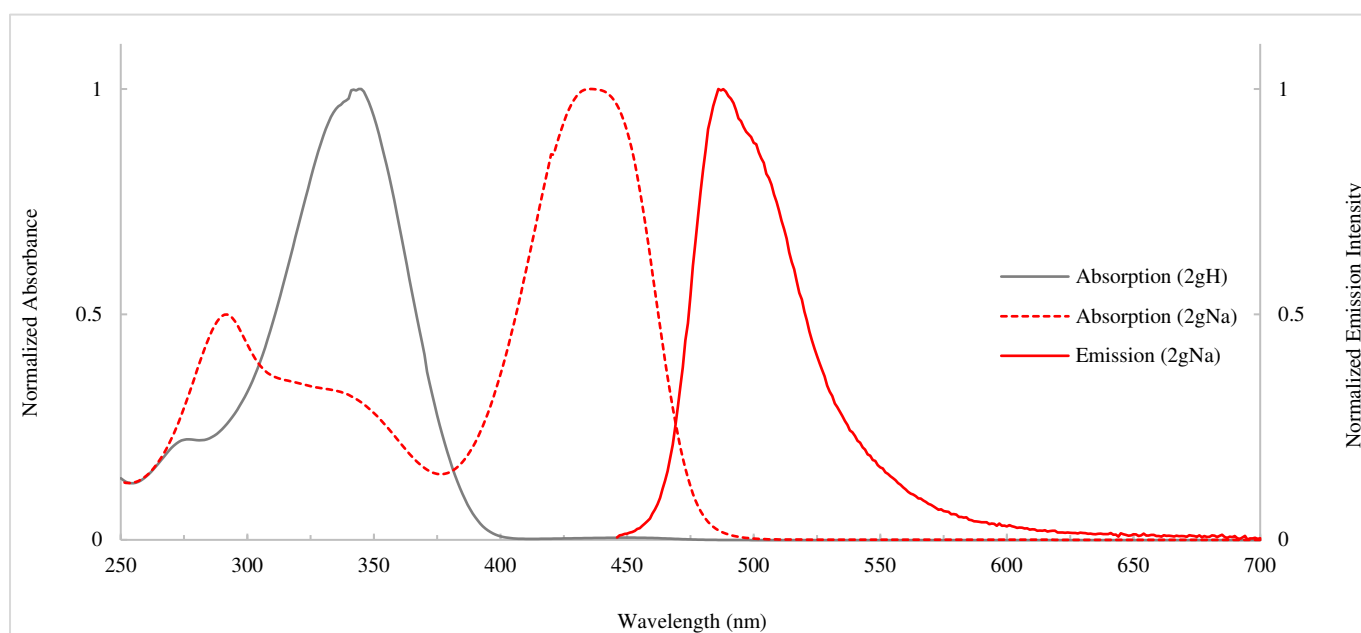

**Figure S15.** Normalized absorption and emission spectra of **2gH** and **2gNa** in THF.

**Table S1.** Summary of Photophysical Properties of **2aH–2gH** and **2aNa–2gNa** in THF.

| amidine    | $\epsilon$ ( $M^{-1}\cdot cm^{-1}$ ) | $\lambda_{ABS}$ (nm) | amidinate   | $\epsilon$ ( $M^{-1}\cdot cm^{-1}$ ) | $\lambda_{ABS}$ (nm) | $\lambda_{EM}$ (nm) | $\Delta\nu$ ( $cm^{-1}$ ) | $\Phi$ (%) |
|------------|--------------------------------------|----------------------|-------------|--------------------------------------|----------------------|---------------------|---------------------------|------------|
| <b>2aH</b> | 30703                                | 329                  | <b>2aNa</b> | 25362                                | 411                  | 471                 | 3099                      | 78         |
| <b>2bH</b> | 39982                                | 317                  | <b>2bNa</b> | 14764                                | 391                  | 446                 | 3154                      | 67         |
| <b>2cH</b> | 71929                                | 325                  | <b>2cNa</b> | 26284                                | 402                  | 457                 | 2994                      | 76         |
| <b>2dH</b> | 45306                                | 375                  | <b>2dNa</b> | 34286                                | 495                  | 568                 | 2596                      | 21         |
| <b>2eH</b> | 30122                                | 294                  | <b>2eNa</b> | 19887                                | 355                  | 436                 | 5233                      | 24         |
| <b>2fH</b> | 41059                                | 332                  | <b>2fNa</b> | 28995                                | 422                  | 474                 | 2600                      | 81         |
| <b>2gH</b> | 27722                                | 345                  | <b>2gNa</b> | 29528                                | 436                  | 481                 | 2146                      | 65         |

**2aH–2gH:**  $1.0 \times 10^{-5}$  M, **2aNa–2gNa:**  $1.0 \times 10^{-4}$  M.

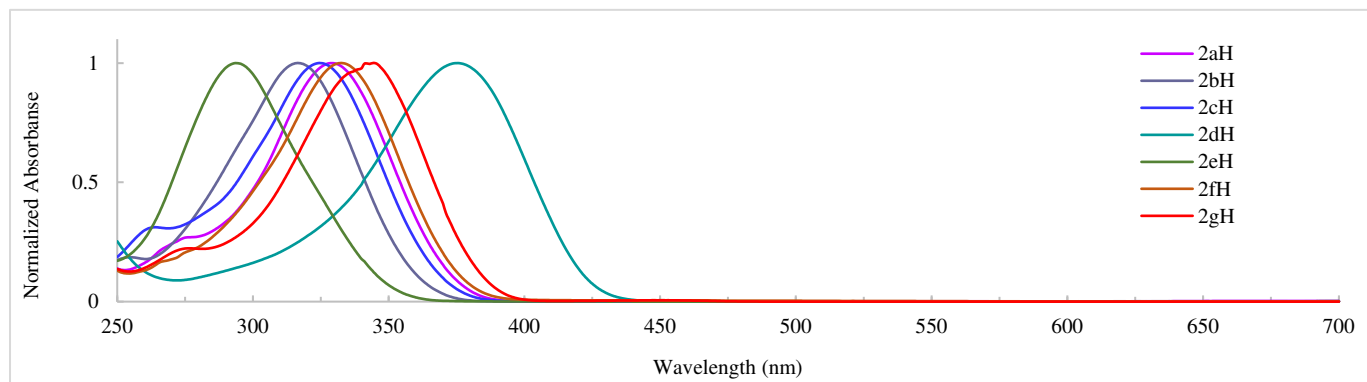**Figure S16.** Normalized absorption of **2aH–2gH** in THF.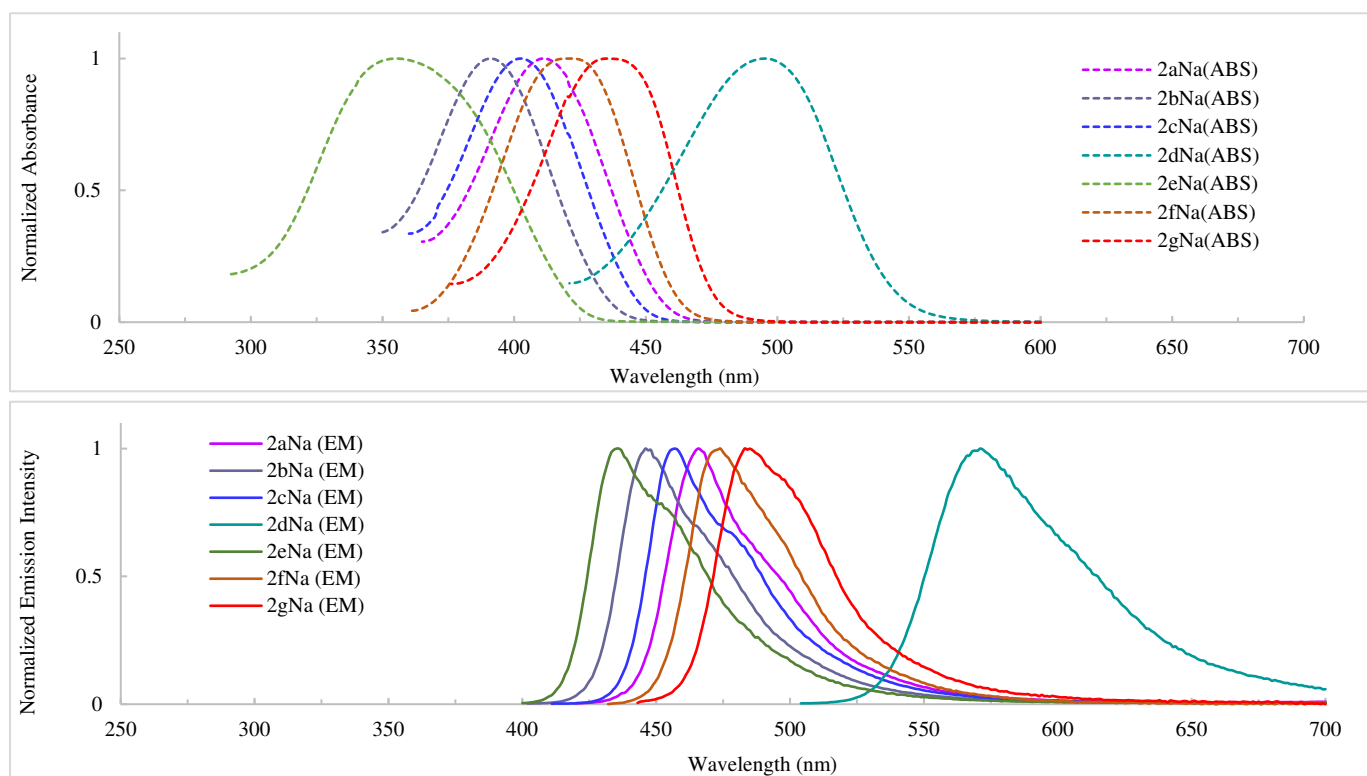**Figure S17.** (Top) normalized absorption spectra of **2aNa–2gNa** in THF. (Bottom) normalized emission spectra of **2aNa–2gNa**.

### (E) Cation Effects on the Absorption & Emission Spectra

For **2gNa** in THF ( $1.0 \times 10^{-5}$  M):

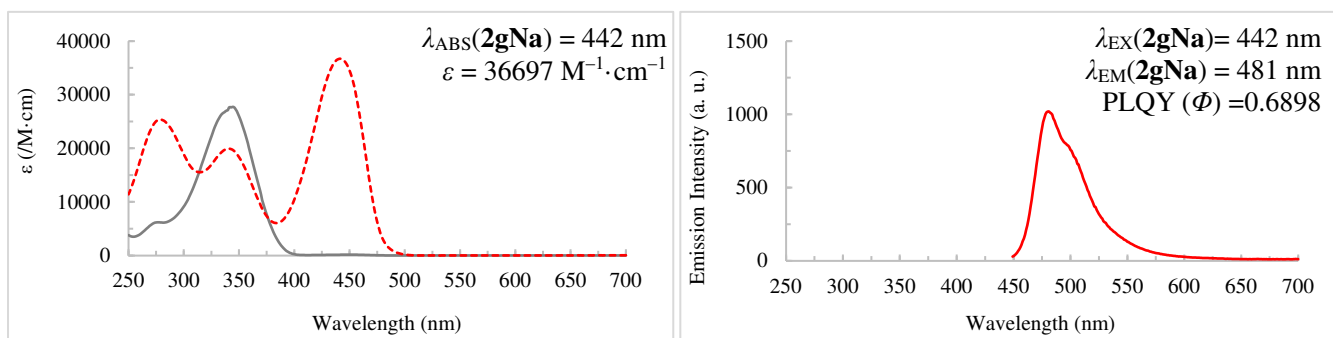

Figure S18. (Left) UV-Vis absorption spectrum of **2gH** and **2gNa**. (Right) emission spectrum of **2gNa**.

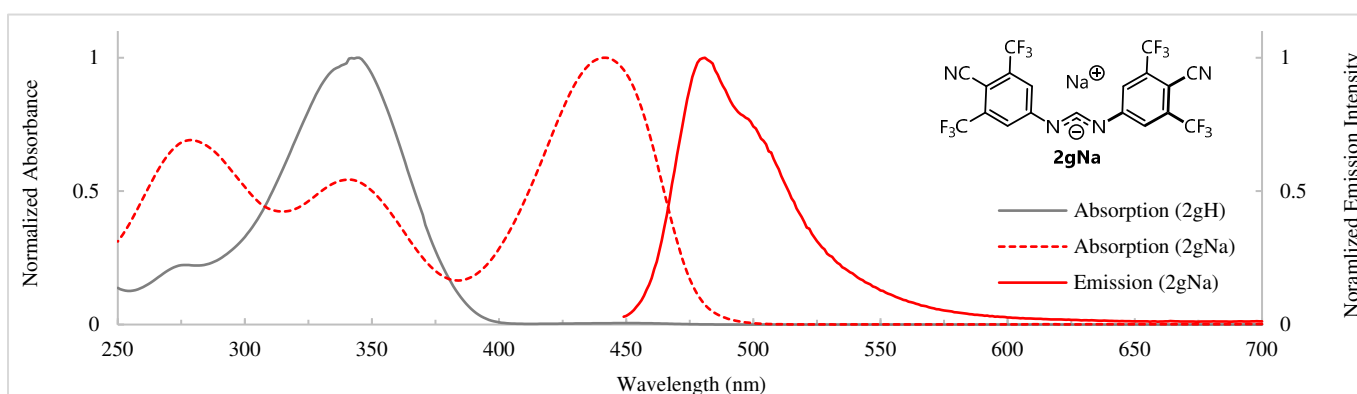

Figure S19. Normalized absorption and emission spectra of **2gH** and **2gNa** in THF.

For **2gLi** in THF ( $1.0 \times 10^{-5}$  M):

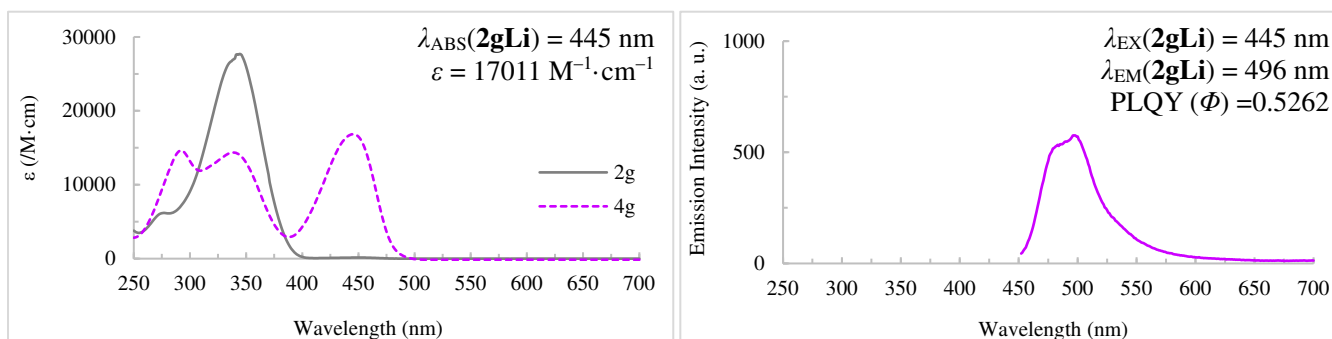

Figure S20. (Left) UV-Vis absorption spectrum of **2gH** and **2gLi**. (Right) emission spectrum of **2gLi**.

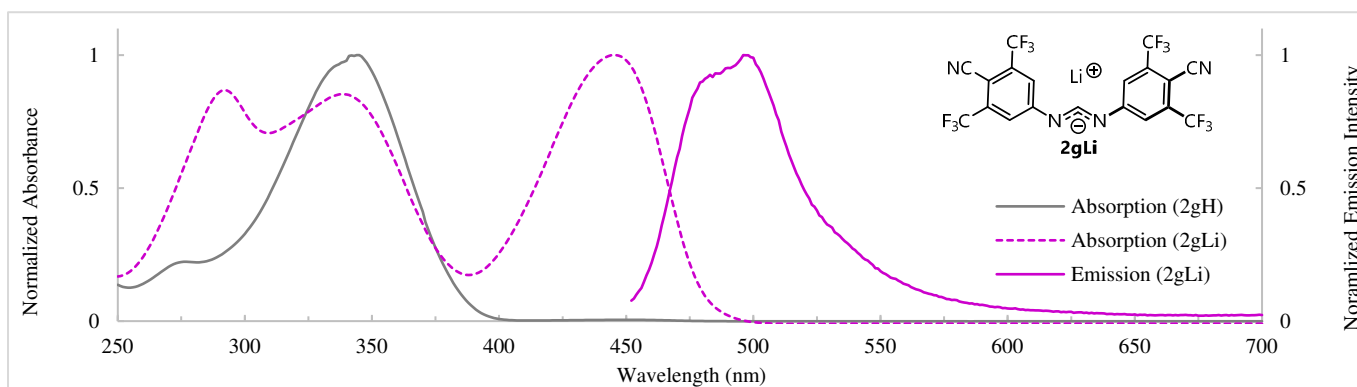

Figure S21. Normalized absorption and emission spectra of **2gH** and **2gLi** in THF.

For **2gNa(15c5)** in THF ( $1.0 \times 10^{-5}$  M):

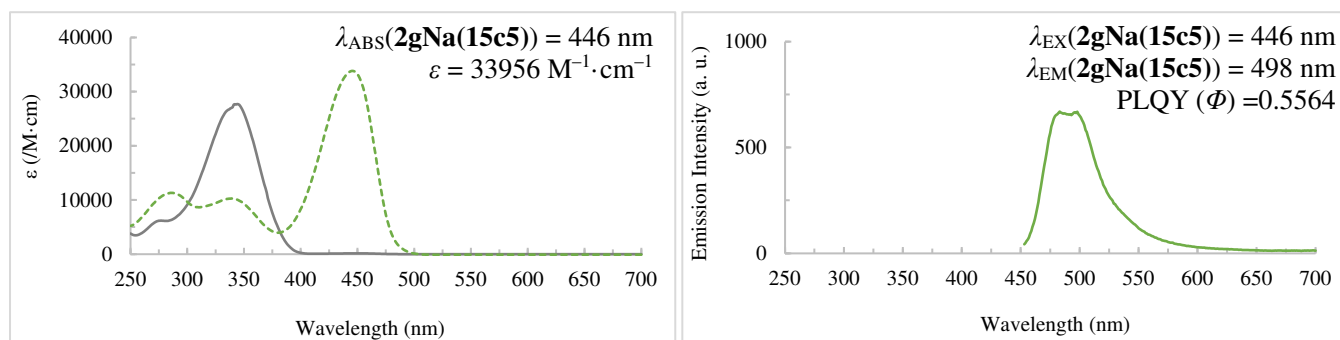

**Figure S22.** (Left) UV-Vis absorption spectrum of **2gH** and **2gNa(15c5)**. (Right) emission spectrum of **2gNa(15c5)**.

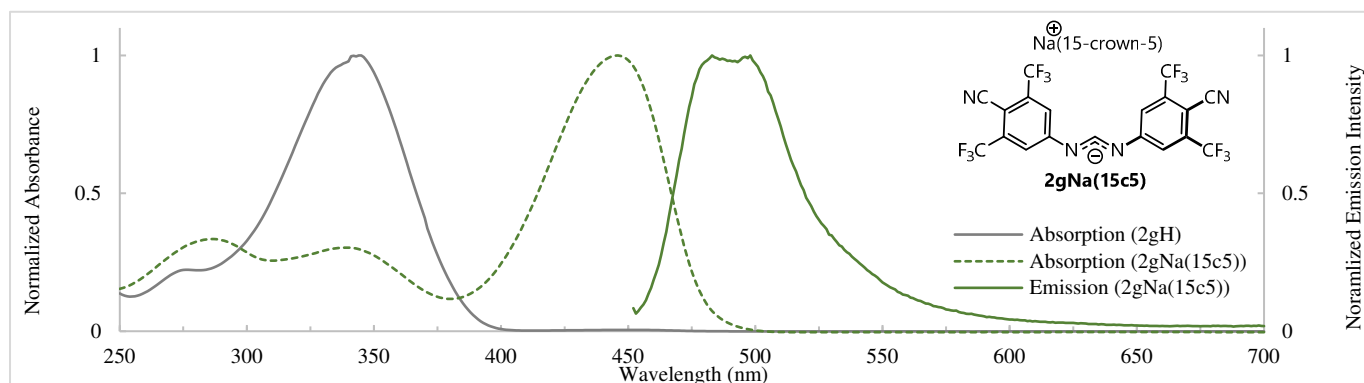

**Figure S23.** Normalized absorption and emission spectra of **2gH** and **2gNa(15c5)** in THF.

For **2gK** in THF ( $1.0 \times 10^{-5}$  M):

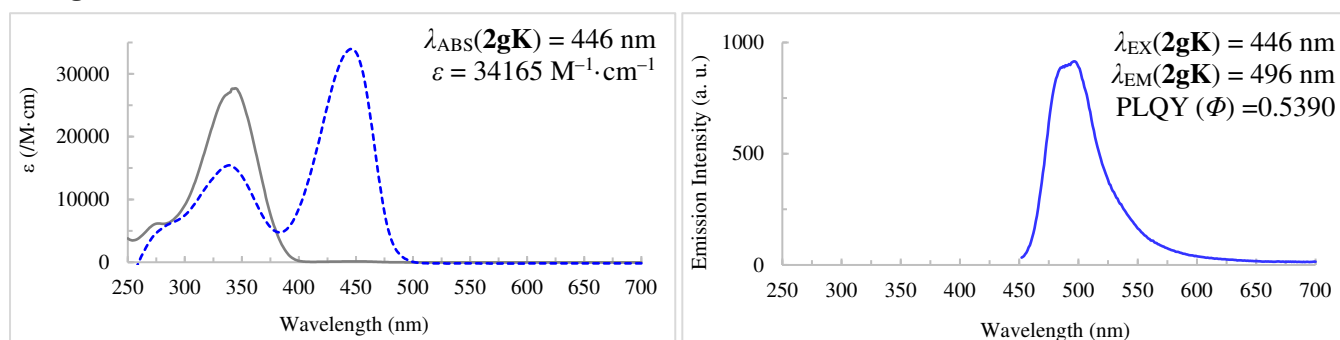

**Figure S24.** (Left) UV-Vis absorption spectrum of **2gH** and **2gK**. (Right) emission spectrum of **2gK**.

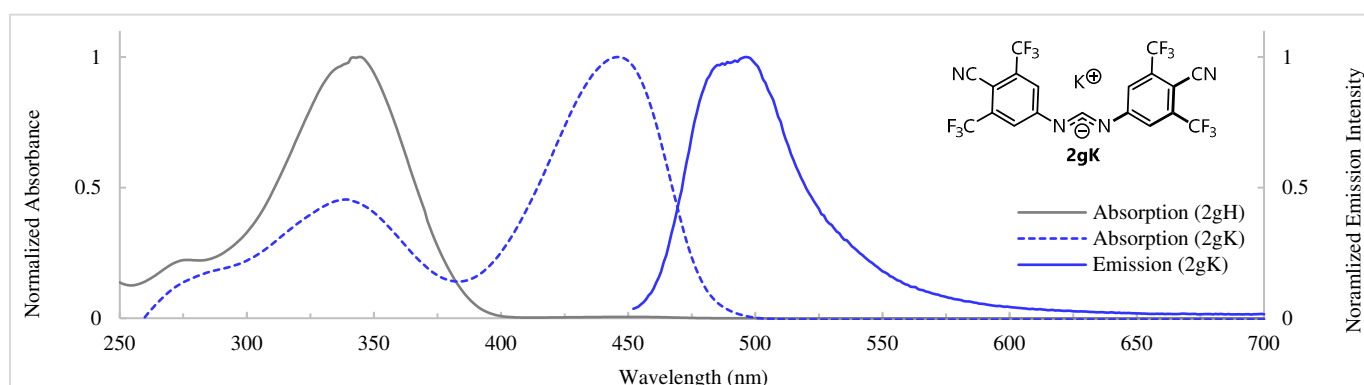

**Figure S25.** Normalized absorption and emission spectra of **2gH** and **2gK** in THF.



For **2gHdbu** in THF ( $1.0 \times 10^{-5}$  M):

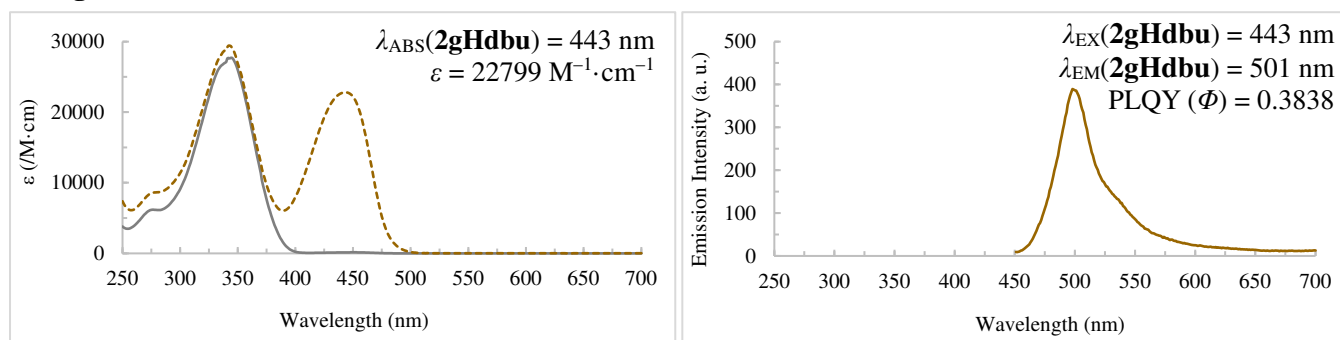

**Figure S26.** (Left) UV-Vis absorption spectrum of **2gH** and **2gHdbu**. (Right) emission spectrum of **2gHdbu**.

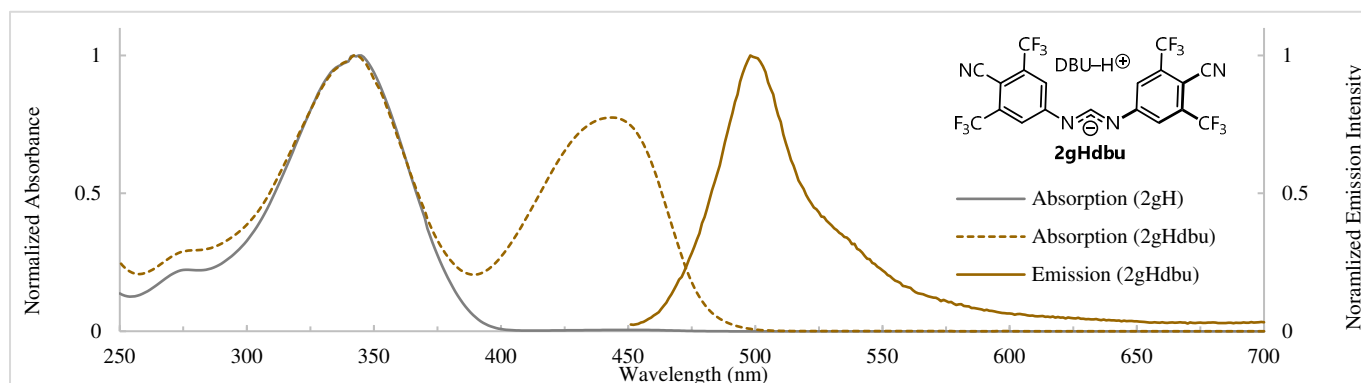

**Figure S27.** Normalized absorption and emission spectra of **2gH** and **2gHdbu** in THF.

**Table S2.** Summary of Photophysical Properties of **2gM** in THF.

| cation                        | <b>2gM</b>        | $\epsilon$ ( $M^{-1}\cdot cm^{-1}$ ) | $\lambda_{ABS}$ (nm) | $\lambda_{EM}$ (nm) | $\Delta\nu$ ( $cm^{-1}$ ) | $\Phi$ (%) |
|-------------------------------|-------------------|--------------------------------------|----------------------|---------------------|---------------------------|------------|
| Li <sup>+</sup>               | <b>2gLi</b>       | 17011                                | 445                  | 496                 | 2311                      | 53         |
| Na <sup>+</sup>               | <b>2gNa</b>       | 36697                                | 442                  | 481                 | 1834                      | 69         |
| [Na(15-crown-5)] <sup>+</sup> | <b>2gNa(15c5)</b> | 33955                                | 446                  | 498                 | 2341                      | 56         |
| K <sup>+</sup>                | <b>2gK</b>        | 34165                                | 446                  | 496                 | 2260                      | 54         |
| DBU-H <sup>+</sup>            | <b>2gHdbu</b>     | 22799                                | 443                  | 498                 | 2493                      | 38         |

**2gM:**  $1.0 \times 10^{-5}$  M

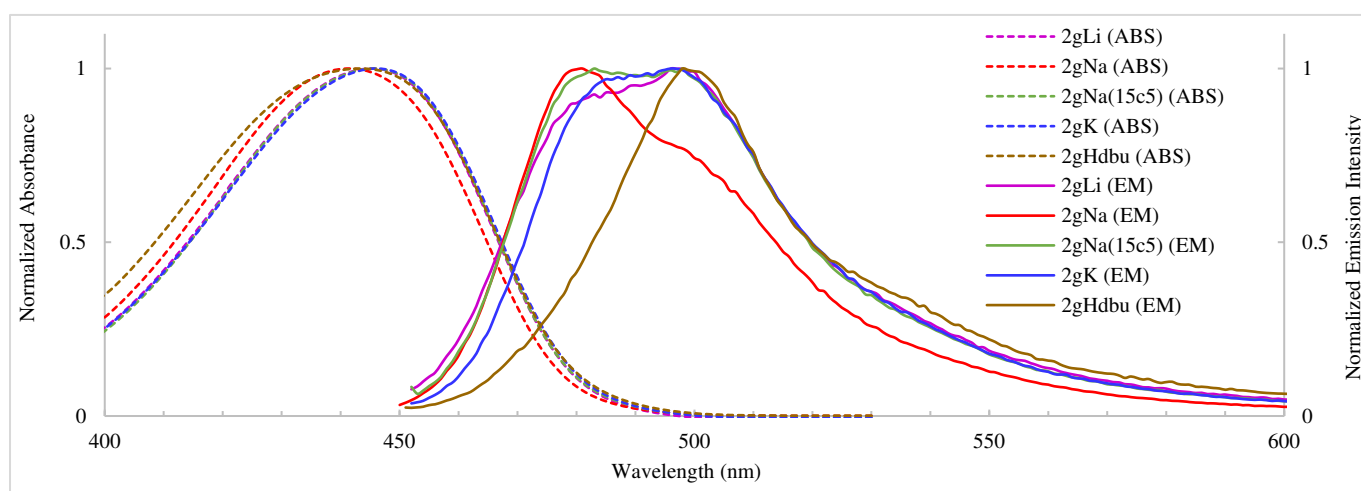

**Figure S28.** Normalized absorption and emission spectra of **2gNa-2gHdbu** in THF.

## (F) Solid-State Emission Properties

**Table S3.** Solid-State Emission of **2gNa–2gDBUH**.

| cation                                  | 2gM               | $\lambda_{\text{EX}}$ (nm) | $\lambda_{\text{EM}}$ (nm) | $\Phi$ (%) |
|-----------------------------------------|-------------------|----------------------------|----------------------------|------------|
| Li <sup>+</sup>                         | <b>2gLi</b>       | 445                        | 498                        | 9          |
| Na                                      | <b>2gNa</b>       | 442                        | 504                        | 14         |
| Na(thf) <sub>2</sub> (OH <sub>2</sub> ) | <b>2gNa(xt)</b>   | 442                        | 498                        | 14         |
| [Na(15-crown-5)] <sup>+</sup>           | <b>2gNa(15c5)</b> | 446                        | 524                        | 29         |
| K <sup>+</sup>                          | <b>2gK</b>        | 446                        | 499                        | 13         |
| DBU–H <sup>+</sup>                      | <b>2gHdbu</b>     | 443                        | 538                        | 14         |

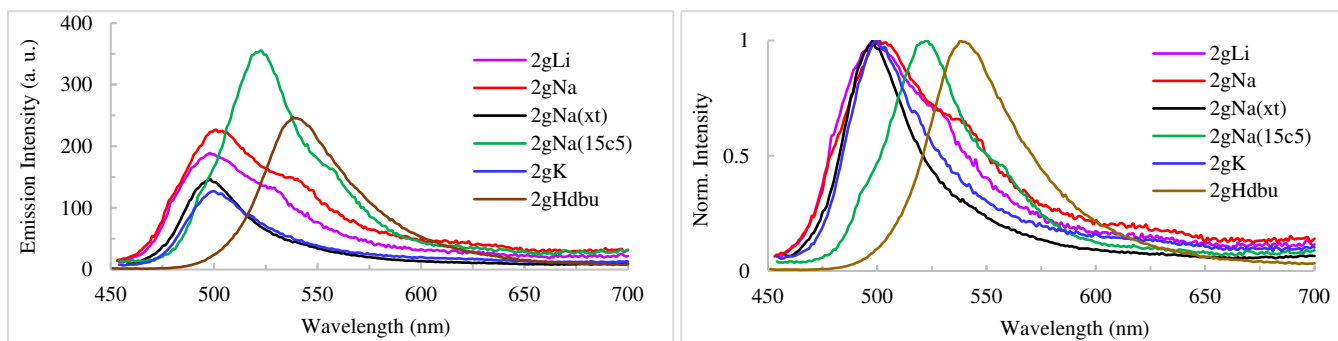

**Figure S29.** (Left) solid-state emission spectra of **2gM**. (Right) normalized spectra.

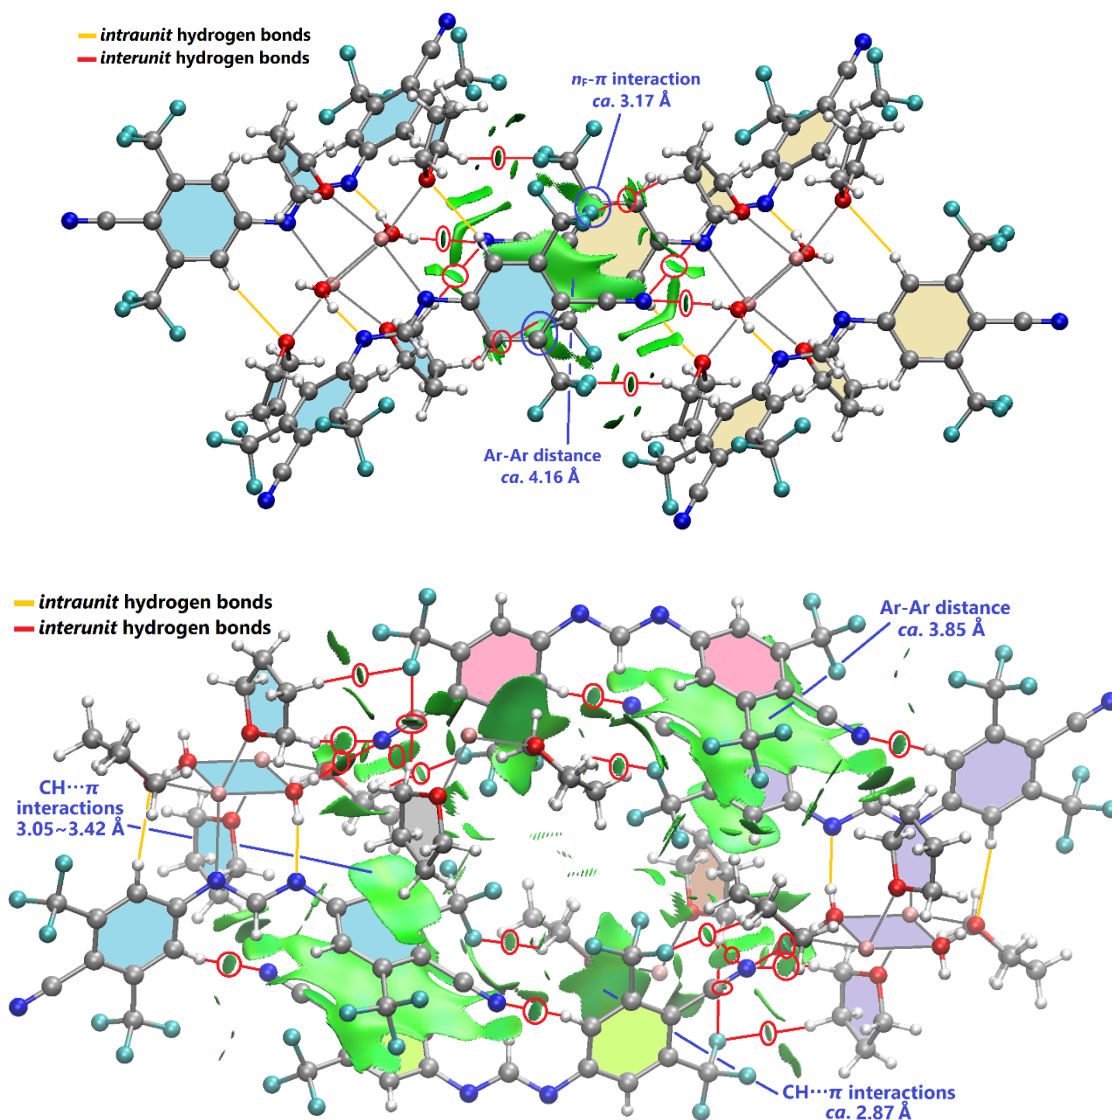

**Figure S30.** Mappings of intra- and intermolecular interactions of **[2gNa(thf)<sub>2</sub>(OH<sub>2</sub>)<sub>2</sub>]** in the crystal structures. (Top) Interunit interactions of “X axis”. (Bottom) Interunit interactions of “Y and Z axes”.

## (G) Solvent Effects on the Absorption & Emission

**Table S4.** Photophysical Properties of **2gNa(15c5)** in Various Solvents.

| solvent           | $\epsilon_r$ | $\epsilon$ ( $M^{-1}\cdot cm^{-1}$ ) | $\lambda_{ABS}$ (nm) | $\lambda_{EM}$ (nm) | $\Delta\nu$ ( $cm^{-1}$ ) | $\Phi$ (%) | $\tau$ (ns) |
|-------------------|--------------|--------------------------------------|----------------------|---------------------|---------------------------|------------|-------------|
| toluene           | 2.38         | 14999                                | 432                  | 474                 | 2078                      | 91         | -           |
| CHCl <sub>3</sub> | 4.81         | 11615                                | 430                  | 478                 | 2362                      | 80         | -           |
| THF               | 7.58         | 33956                                | 446                  | 498                 | 2341                      | 56         | 1.54        |
| MeCN              | 35.9         | 94224                                | 449                  | 497                 | 2126                      | 0.56       | 3.37        |
| DMSO              | 46.5         | 59932                                | 459                  | 509                 | 2164                      | 4.3        | -           |

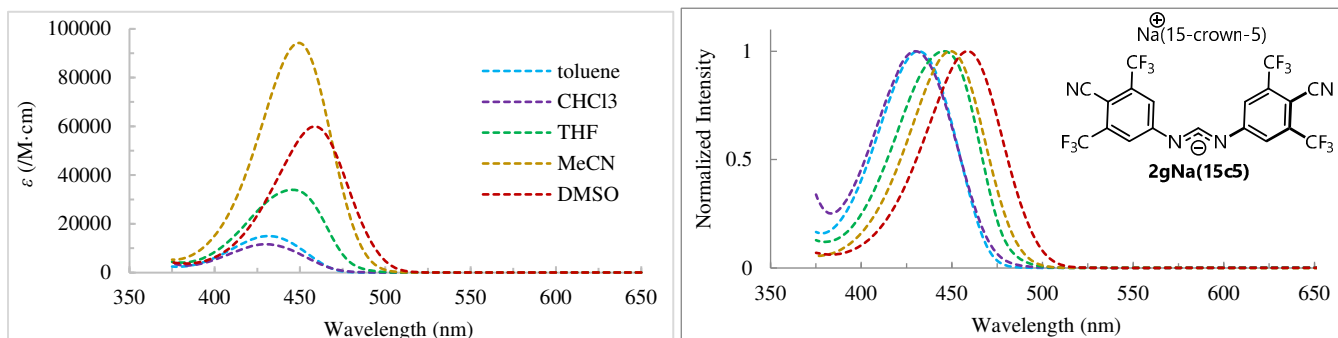

**Figure S31.** (Left) UV-Vis absorption spectra of **2gNa(15c5)** in various solvents ( $1.0 \times 10^{-5}$  M). (Right) normalized spectra.

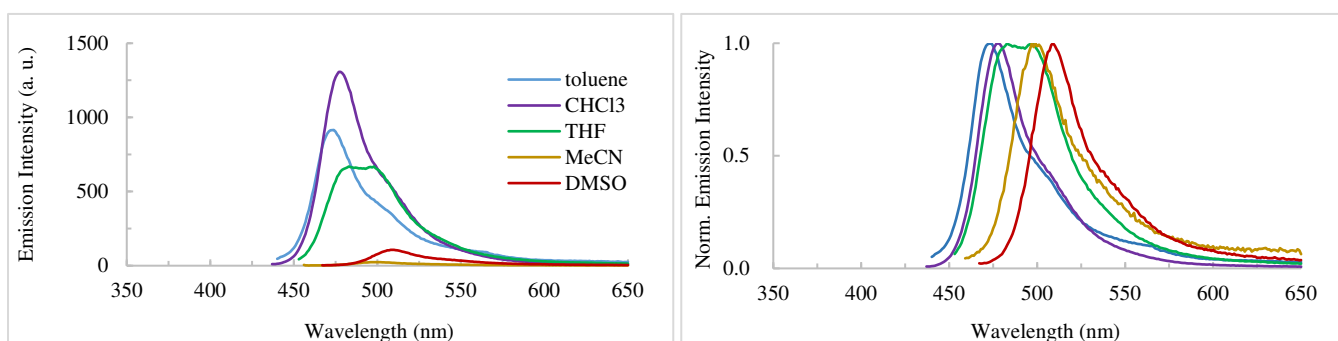

**Figure S32.** (Left) Emission spectra of **2gNa(15c5)** in various solvents ( $1.0 \times 10^{-5}$  M). (Right) normalized spectra.

**Table S5.** Lippert-Mataga plot for **2gNa(15c5)**.

| solvent           | $\epsilon_r$ | $n$   | $\Delta f$ | $\lambda_{ABS}$ (nm) | $\nu_{ABS}$ ( $cm^{-1}$ ) | $\lambda_{EM}$ (nm) | $\nu_{EM}$ ( $cm^{-1}$ ) | $\Delta\nu$ ( $cm^{-1}$ ) |
|-------------------|--------------|-------|------------|----------------------|---------------------------|---------------------|--------------------------|---------------------------|
| toluene           | 2.38         | 1.496 | 0.013504   | 431.5                | 23175.0                   | 474.0               | 21097.0                  | 2077.9                    |
| CHCl <sub>3</sub> | 4.81         | 1.443 | 0.149202   | 429.5                | 23282.9                   | 478.0               | 20920.5                  | 2362.4                    |
| THF               | 7.58         | 1.408 | 0.209297   | 446.0                | 22421.5                   | 498.0               | 20080.3                  | 2341.2                    |
| MeCN              | 35.9         | 1.344 | 0.304587   | 449.5                | 22246.9                   | 497.0               | 20120.7                  | 2126.2                    |
| DMSO              | 46.5         | 1.477 | 0.263734   | 458.5                | 21810.3                   | 509.0               | 19646.4                  | 2163.9                    |

Lippert-Mataga equation:

$$\Delta\nu = \frac{2(\Delta\mu)^2}{hca^3} \Delta f + const. \quad (\text{eq. 1})$$

$$\Delta\nu = \nu_{ABS} - \nu_{EM} \quad (\text{eq. 2})$$

$$\Delta\mu = \mu_{EX} - \mu_{GR} \quad (\text{eq. 3})$$

$$\Delta f = \frac{\epsilon - 1}{2\epsilon + 1} - \frac{n^2 - 1}{2n^2 + 1} \quad (\text{eq. 4})$$

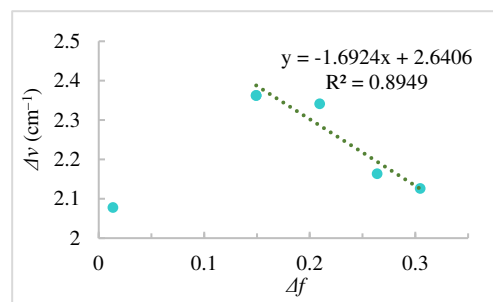

( $\epsilon_r$ : dielectric constant,  $n$ : refractive index,  $h$ : Planck constant ( $6.6256 \times 10^{-27}$ ),  $c$ : speed of light ( $2.9979 \times 10^{10}$  cm/s),  $a$ : Onsager radius (for **2g**:  $7.22 \text{ \AA}$ )<sup>S8</sup>,  $\mu$ : dipole moment (for **2gNa(15c5)** anion:  $\mu_{EX} = 0.07$  Debye,  $\mu_{GR} = 0.99$  Debye).

**Table S6.** Photophysical Properties of **2dNa** in Solvents.

| solvent | $\epsilon_r$ | $\epsilon$ ( $M^{-1}\cdot cm^{-1}$ ) | $\lambda_{ABS}$ (nm) | $\lambda_{EM}$ (nm) | $\Delta\nu$ ( $cm^{-1}$ ) | $\Phi$ (%) |
|---------|--------------|--------------------------------------|----------------------|---------------------|---------------------------|------------|
| THF     | 7.58         | 11469                                | 469                  | 571                 | 3809                      | 56         |
| MeCN    | 35.9         | 8102                                 | 530                  | —                   | —                         | <0.1       |
| DMSO    | 46.5         | 5346                                 | 550                  | —                   | —                         | <0.1       |

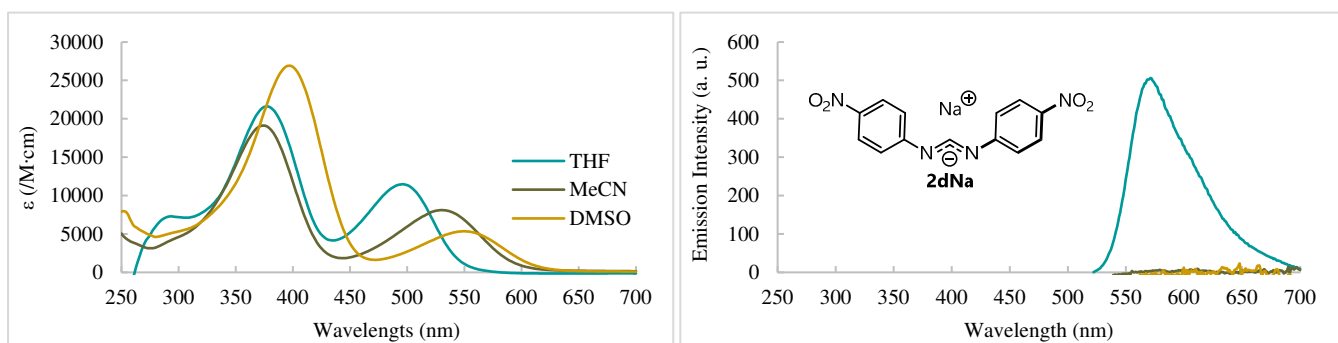**Figure S33.** (Left) UV-Vis absorption of **2dNa** in solvents ( $1.0 \times 10^{-5}$  M). (Right) emission spectra of **2dNa** ( $1.0 \times 10^{-4}$  M).**(H) Emission Lifetimes**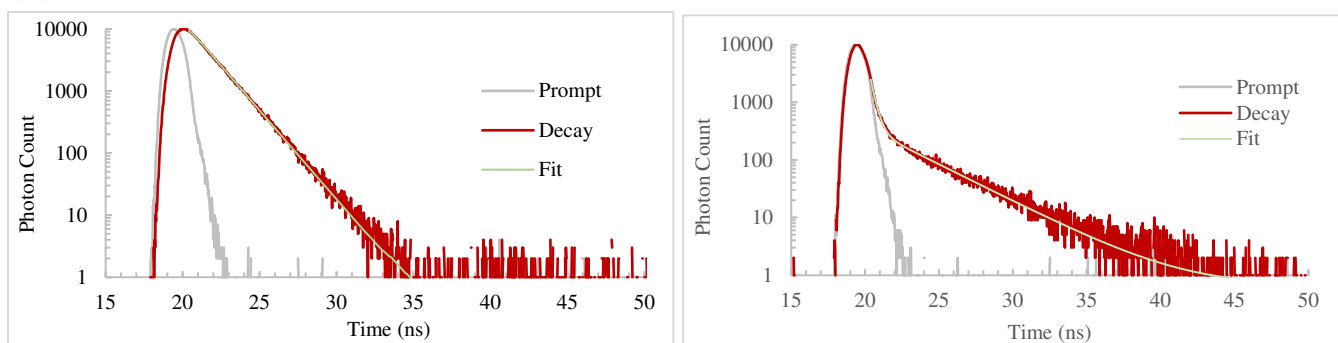

$$\tau = 1.54 \text{ ns (100\%), } \chi^2 = 1.096$$

$$\tau_1 = 0.32 \text{ ns (38.7\%), } \tau_2 = 3.37 \text{ ns (61.3\%), } \chi^2 = 1.195$$

**Figure S34.** (Left) emission decay of **2gNa(15c5)** in THF ( $1.0 \times 10^{-5}$  M, argon-bubbled). (Right) emission decay of **2gNa(15c5)** in MeCN ( $1.0 \times 10^{-5}$  M, argon-bubbled).\*

\*The emission in MeCN would be a prompt fluorescence (no delayed emission), though it appears to exhibit biexponential decay. The emission was extremely weak in MeCN, thus overlapping to the measurement threshold.

### (I) Temperature Dependence of Photoluminescence

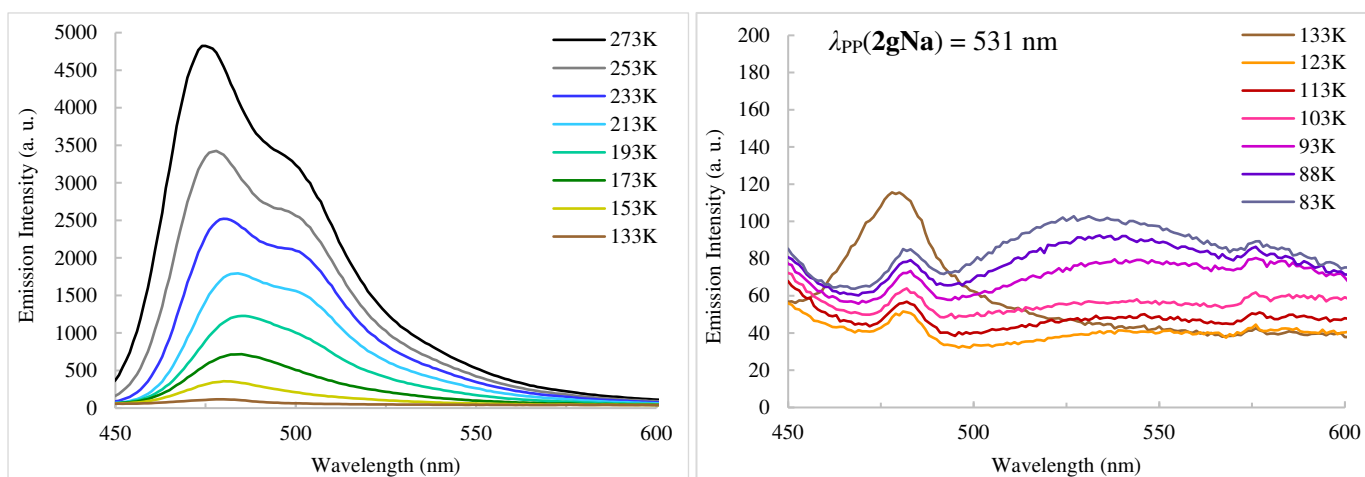

**Figure S35.** Variable-temperature emission spectra of **2gNa** in 2MeTHF ( $1.0 \times 10^{-5}$  M) at 273–133 K (left) and 133–83 K (right) under 421 nm photoexcitation.

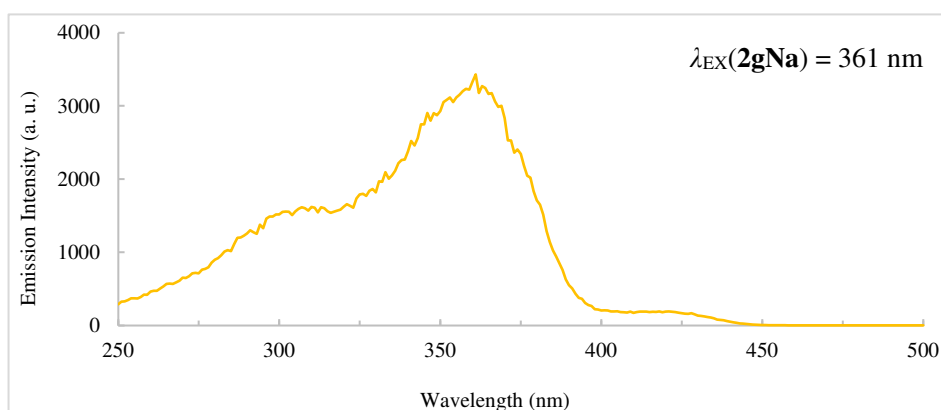

**Figure S36.** Excitation spectrum of **2gNa** in 2MeTHF ( $1.0 \times 10^{-5}$  M) at 77 K corresponding to the phosphorescence with the emission maximum at 531 nm.

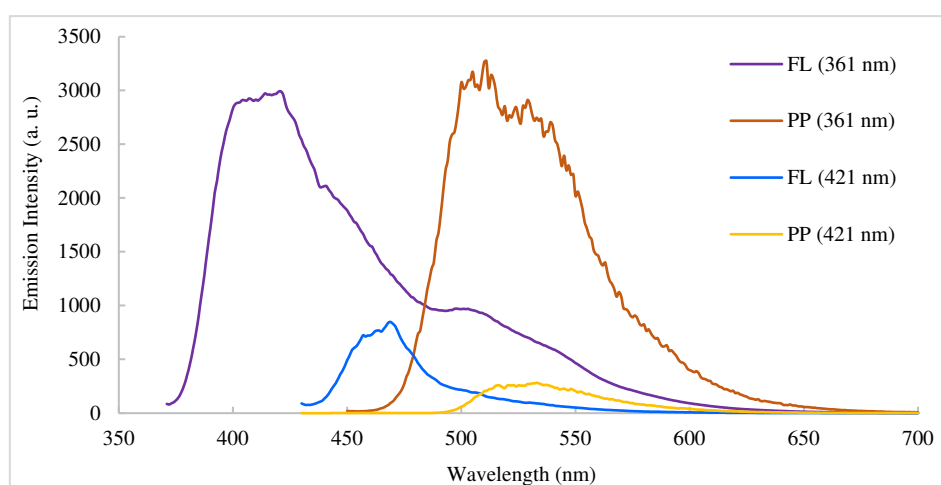

**Figure S37.** Fluorescence (FL) and phosphorescence spectra of **2gNa** in 2MeTHF at 77 K upon 361- and 421-nm irradiation (delay: 10 ms). FL: fluorescence, PP: phosphorescence.

## (J) Computational Details

All quantum chemical calculations were performed using Gaussian 09 program package.<sup>S9</sup> All the optimized geometries, frequencies, and zero-point energies were calculated using B3LYP<sup>S10</sup> functional including a D3 version of Grimme's dispersion with Becke-Johnson damping (D3(BJ)).<sup>S11</sup> The geometry optimizations and frequency calculations were carried out with 6-31+G(d,p) basis set. The geometry optimizations were performed without any symmetry constraint followed by analytical frequency calculations to confirm that a minimum had been reached. A single-point energy calculations were conducted with the polarized valence triple- $\zeta$  basis set 6-311++G(2d,p) basis set. Solvent effects (THF;  $\epsilon = 7.58$ ) were introduced for all calculations by means of the polarizable continuum models implemented in Gaussian 09. SMD<sup>S12</sup> model was employed for the single-point calculations at the geometries that optimized with IEFPCM<sup>S13</sup> model for all the minima.

The electronic energies and the Gibbs energies at 298.15 K and 1 atm were obtained by adding the thermal energy corrections and the Gibbs energy corrections derived from the analytical frequency calculations to the single-point energies, respectively. The energy levels of the frontier orbitals (HOMO and LUMO(+ $x$ ) orbitals), excitation energies, absorption (or emission) wavelengths, and the oscillator strengths were estimated by the time-dependent (TD) calculation of each optimized ground-state geometries at TD-B3LYP-D3(BJ)/6-311++G(2d,p)/SMD(THF). For the  $S_1$  excited states, the same levels of theory were used to estimate the above parameters against each optimized excited-state geometries at TD-B3LYP-D3(BJ)/6-31+G(d,p)/IEFPCM(THF). These calculations involve a certain margin error.

**(J-1) Frontier Orbital Energies, Excitation Parameters, and NBO Analysis of *N,N'*-Diarylformamidinate Anions**

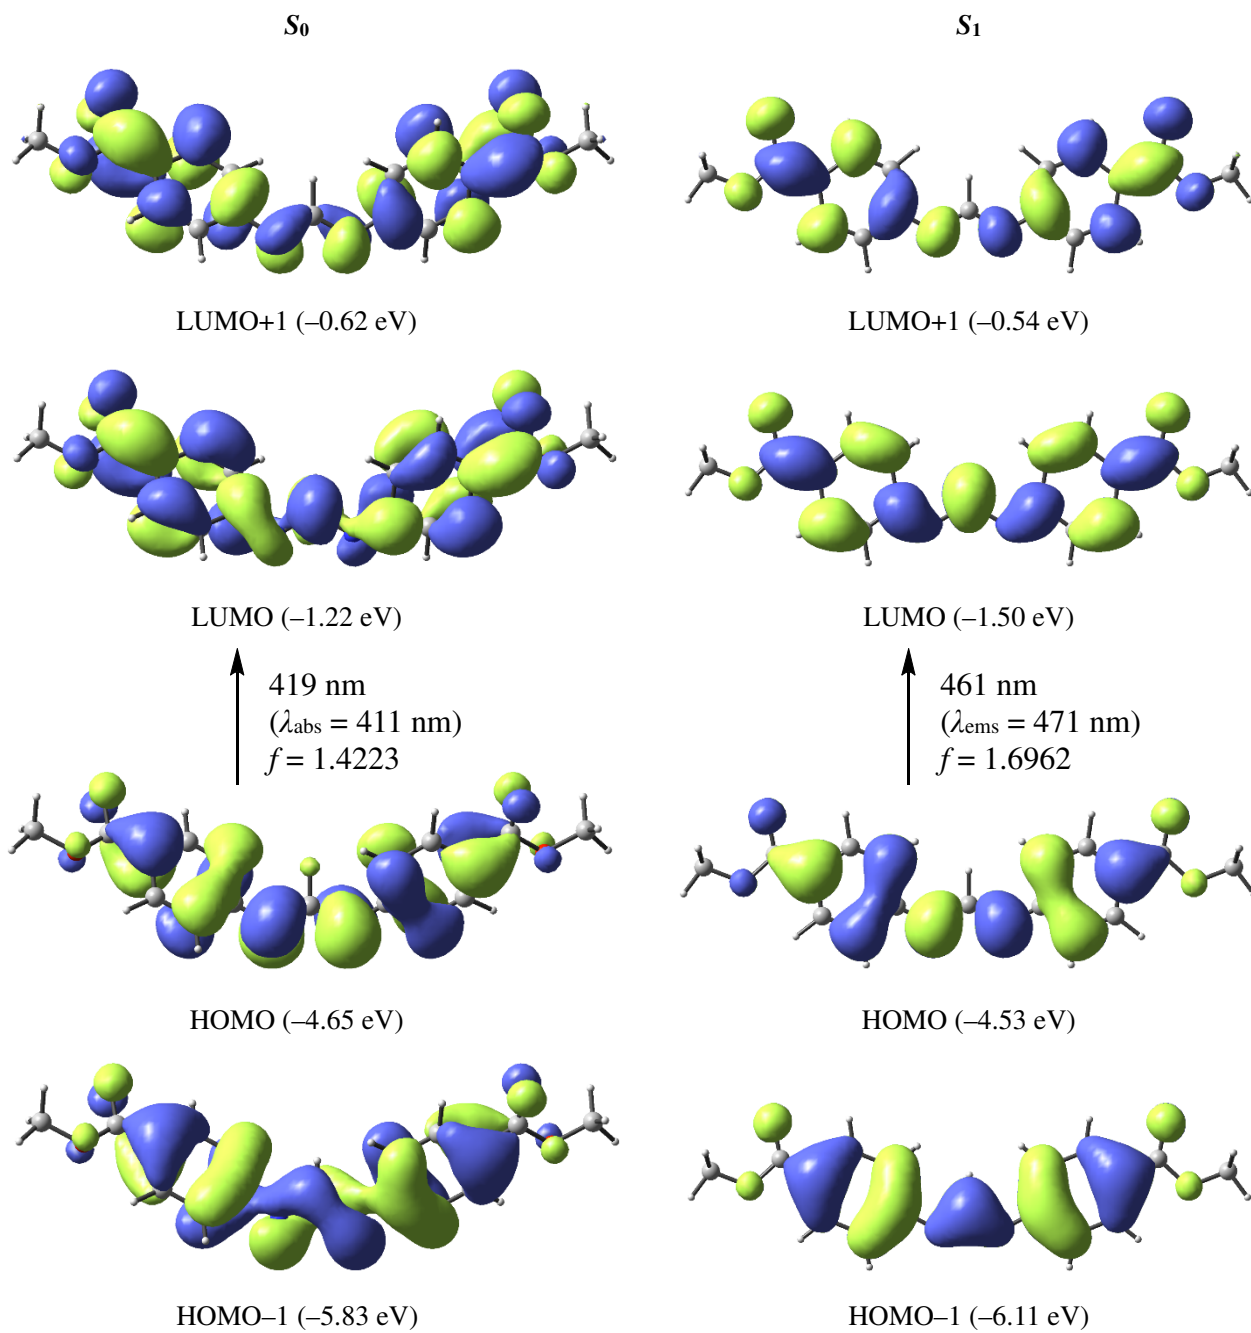

**Figure S38.**  $S_0$ - and  $S_1$ -state MOs, orbital energies, excitation energies, and oscillator strengths of  $2a^-$ .

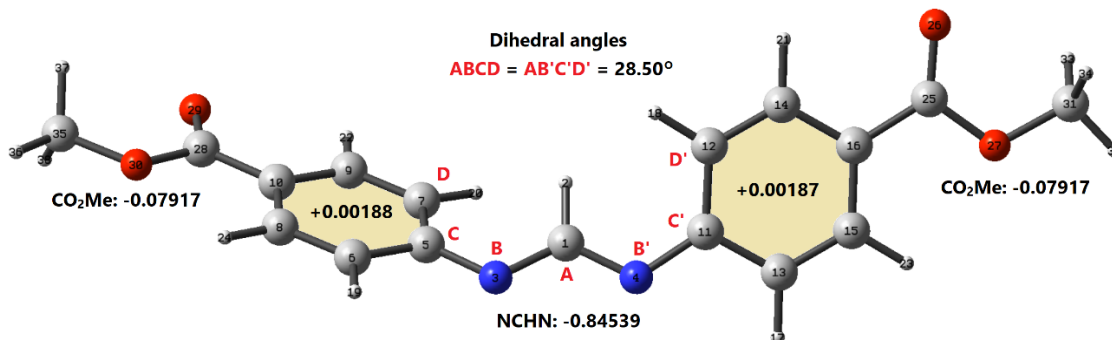

**Figure S39.** Dihedral angles and the sum of natural atomic charges of diazaallyl, aryl, and electron-withdrawing groups of  $2a^-$  ( $S_0$ ).

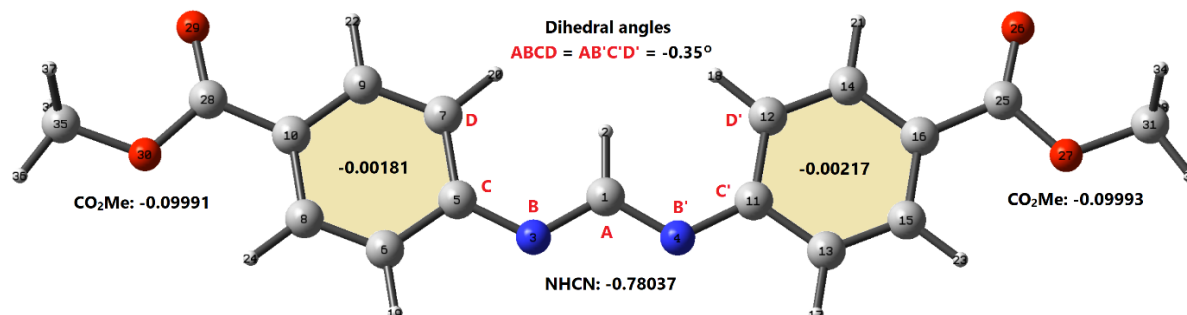

**Figure S40.** Dihedral angles and the sum of natural atomic charges of diazaallyl, aryl, and electron-withdrawing groups of  $2a^-$  anion ( $S_1$ ).

**Table S7.** Natural atomic charges of  $2a^-$  at the  $S_0$  and  $S_1$  states.

| $S_0$      |                  |            |                  |            |                  | $S_1$      |                  |            |                  |            |                  |
|------------|------------------|------------|------------------|------------|------------------|------------|------------------|------------|------------------|------------|------------------|
| NCHN       | NPA ( $\delta$ ) | Ar1        | NPA ( $\delta$ ) | Ar2        | NPA ( $\delta$ ) | NCHN       | NPA ( $\delta$ ) | Ar1        | NPA ( $\delta$ ) | Ar2        | NPA ( $\delta$ ) |
| C 1        | 0.30242          | C 5        | 0.18412          | C 11       | 0.18412          | C 1        | 0.41673          | C 5        | 0.18079          | C 11       | 0.18080          |
| H 2        | 0.12598          | C 6        | -0.24335         | C 12       | -0.27349         | H 2        | 0.12652          | C 6        | -0.24566         | C 12       | -0.30353         |
| N 3        | -0.63689         | C 7        | -0.27349         | C 13       | -0.24336         | N 3        | -0.66181         | C 7        | -0.30354         | C 13       | -0.24573         |
| N 4        | -0.63690         | C 8        | -0.16339         | C 14       | -0.15211         | N 4        | -0.66181         | C 8        | -0.16150         | C 14       | -0.07839         |
|            |                  | C 9        | -0.15211         | C 15       | -0.16339         |            |                  | C 9        | -0.07840         | C 15       | -0.16160         |
|            |                  | C 10       | -0.22617         | C 16       | -0.22617         |            |                  | C 10       | -0.25840         | C 16       | -0.25844         |
|            |                  | H 17       | 0.21453          | H 19       | 0.21453          |            |                  | H 17       | 0.21479          | H 19       | 0.21477          |
|            |                  | H 18       | 0.21612          | H 20       | 0.21612          |            |                  | H 18       | 0.20916          | H 20       | 0.20915          |
|            |                  | H 21       | 0.22321          | H 22       | 0.22321          |            |                  | H 21       | 0.21780          | H 22       | 0.21780          |
|            |                  | H 23       | 0.22241          | H 24       | 0.22241          |            |                  | H 23       | 0.22315          | H 24       | 0.22300          |
|            |                  | C 28       | 0.80590          | C 25       | 0.80590          |            |                  | C 28       | 0.79675          | C 25       | 0.79676          |
|            |                  | O 29       | -0.66638         | O 26       | -0.66638         |            |                  | O 29       | -0.67399         | O 26       | -0.67399         |
|            |                  | O 30       | -0.56894         | O 27       | -0.56894         |            |                  | O 30       | -0.56917         | O 27       | -0.56917         |
|            |                  | C 35       | -0.21239         | C 31       | -0.21239         |            |                  | C 35       | -0.21306         | C 31       | -0.21305         |
|            |                  | H 36       | 0.19010          | H 32       | 0.19010          |            |                  | H 36       | 0.18931          | H 32       | 0.18931          |
|            |                  | H 37       | 0.18632          | H 33       | 0.18632          |            |                  | H 37       | 0.18508          | H 33       | 0.18508          |
|            |                  | H 38       | 0.18622          | H 34       | 0.18622          |            |                  | H 38       | 0.18515          | H 34       | 0.18515          |
| <b>sum</b> | <b>-0.84539</b>  | <b>sum</b> | <b>-0.07729</b>  | <b>sum</b> | <b>-0.7730</b>   | <b>sum</b> | <b>-0.78037</b>  | <b>sum</b> | <b>-0.10174</b>  | <b>sum</b> | <b>-0.10208</b>  |
|            |                  | aryl       | -0.00188         | aryl       | -0.00187         |            |                  | aryl       | -0.00181         | aryl       | -0.00217         |
|            |                  | EWG        | -0.07917         | EWG        | -0.07917         |            |                  | EWG        | -0.09993         | EWG        | -0.09991         |



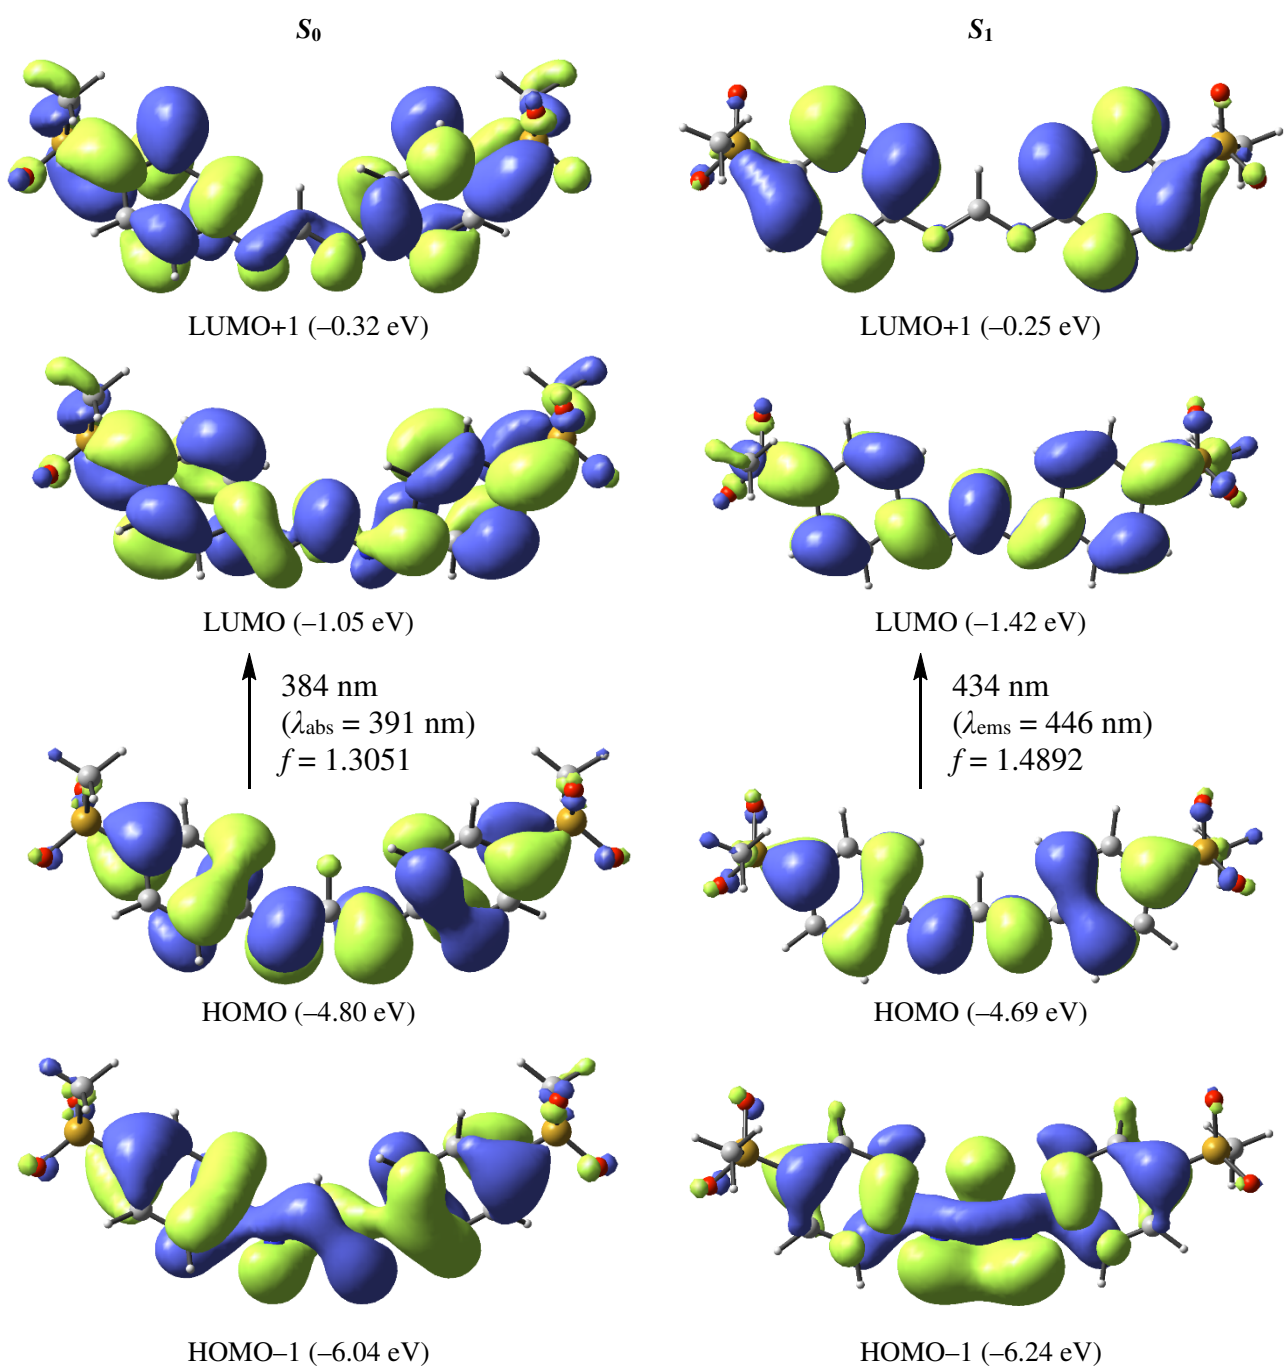

**Figure S41.**  $S_0$ - and  $S_1$ -state MOs, orbital energies, excitation energies, and oscillator strengths of **2b<sup>-</sup>**.

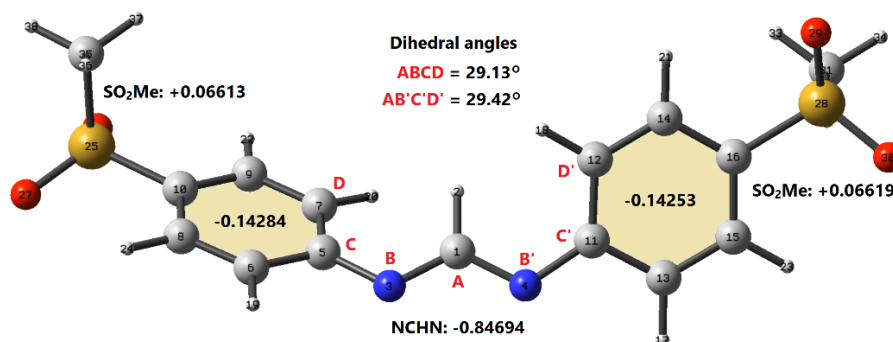

**Figure S42.** Dihedral angles and the sum of natural atomic charges of diazaallyl, aryl, and electron-withdrawing groups of **2b<sup>-</sup>** ( $S_0$ ).

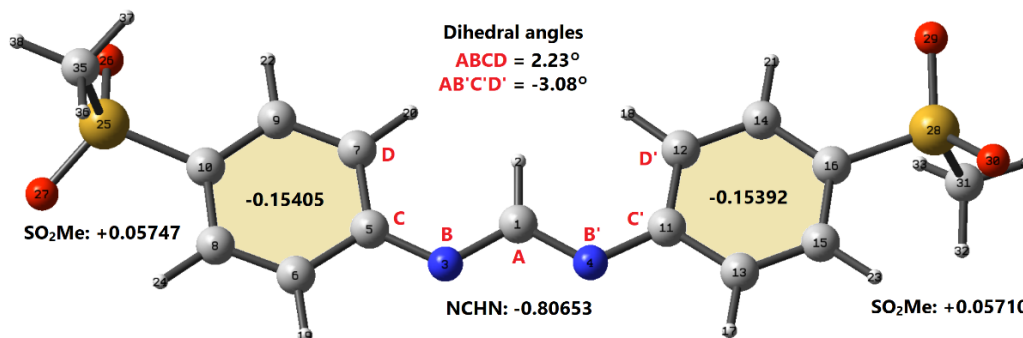

**Figure S43.** Dihedral angles and the sum of natural atomic charges of diazaallyl, aryl, and electron-withdrawing groups of **2b<sup>-</sup>** ( $S_1$ ).

**Table S8.** Natural atomic charges of **2b<sup>-</sup>** at the  $S_0$  and  $S_1$  states.

| $S_0$      |                  |            |                  |            |                  | $S_1$      |                  |            |                  |            |                  |
|------------|------------------|------------|------------------|------------|------------------|------------|------------------|------------|------------------|------------|------------------|
| NCHN       | NPA ( $\delta$ ) | Ar1        | NPA ( $\delta$ ) | Ar2        | NPA ( $\delta$ ) | NCHN       | NPA ( $\delta$ ) | Ar1        | NPA ( $\delta$ ) | Ar2        | NPA ( $\delta$ ) |
| C          | 1                | 0.30418    | C                | 5          | 0.18376          | C          | 11               | 0.18379    | C                | 5          | 0.18642          |
| H          | 2                | 0.12465    | C                | 6          | -0.23248         | C          | 12               | -0.26494   | C                | 6          | -0.23633         |
| N          | 3                | -0.63802   | C                | 7          | -0.26511         | C          | 13               | -0.23249   | C                | 7          | -0.26274         |
| N          | 4                | -0.63775   | C                | 8          | -0.18681         | C          | 14               | -0.18124   | C                | 8          | -0.18148         |
|            |                  |            | C                | 9          | -0.18118         | C          | 15               | -0.18674   | C                | 9          | -0.18282         |
|            |                  |            | C                | 10         | -0.36420         | C          | 16               | -0.36395   | C                | 10         | -0.37626         |
|            |                  |            | H                | 17         | 0.21939          | H          | 19               | 0.21932    | H                | 17         | 0.21950          |
|            |                  |            | H                | 18         | 0.21975          | H          | 20               | 0.21970    | H                | 18         | 0.21440          |
|            |                  |            | H                | 21         | 0.23179          | H          | 22               | 0.23180    | H                | 21         | 0.23346          |
|            |                  |            | H                | 23         | 0.23225          | H          | 24               | 0.23222    | H                | 23         | 0.23180          |
|            |                  |            | S                | 28         | 2.10294          | S          | 25               | 2.10298    | S                | 28         | 2.10069          |
|            |                  |            | O                | 29         | -0.98460         | O          | 26               | -0.98470   | O                | 29         | -0.98667         |
|            |                  |            | O                | 30         | -0.98415         | O          | 27               | -0.98412   | O                | 30         | -0.98633         |
|            |                  |            | C                | 35         | -0.78732         | C          | 31               | -0.78727   | C                | 35         | -0.78538         |
|            |                  |            | H                | 36         | 0.23831          | H          | 32               | 0.23834    | H                | 36         | 0.23663          |
|            |                  |            | H                | 37         | 0.23791          | H          | 33               | 0.23790    | H                | 37         | 0.23652          |
|            |                  |            | H                | 38         | 0.24304          | H          | 34               | 0.24306    | H                | 38         | 0.24201          |
| <b>sum</b> | <b>-0.84694</b>  | <b>sum</b> | <b>-0.07671</b>  | <b>sum</b> | <b>-0.07634</b>  | <b>sum</b> | <b>-0.80653</b>  | <b>sum</b> | <b>-0.09658</b>  | <b>sum</b> | <b>-0.09682</b>  |
|            |                  | aryl       | -0.14284         | aryl       | -0.14253         |            |                  | aryl       | -0.15405         | aryl       | -0.15392         |
|            |                  | EWG        | 0.06613          | EWG        | 0.06619          |            |                  | EWG        | 0.05747          | EWG        | 0.05710          |

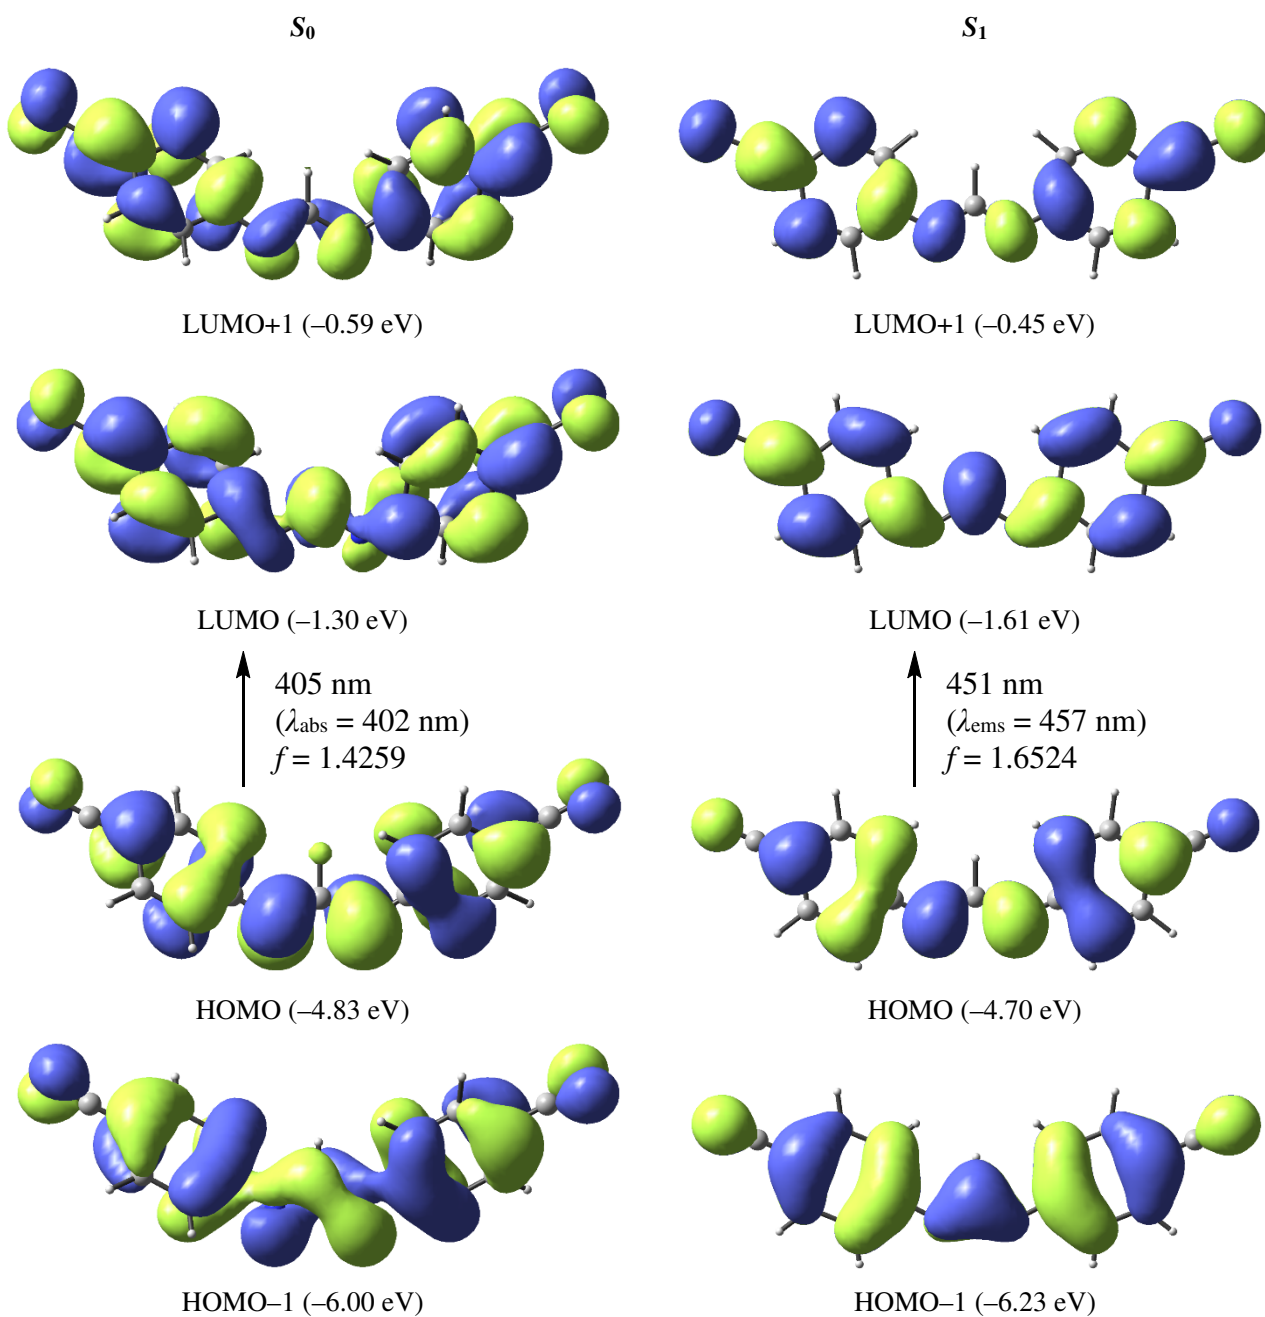

**Figure S44.**  $S_0$ - and  $S_1$ -state MOs, orbital energies, excitation energies, and oscillator strengths of  $2c^-$ .

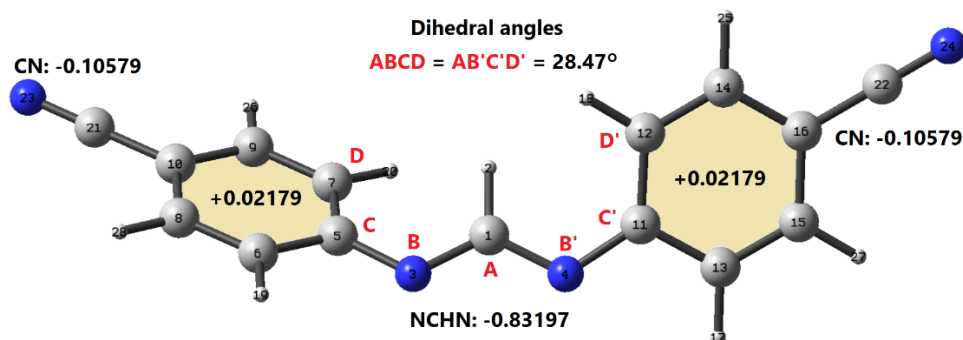

**Figure S45.** Dihedral angles and the sum of natural atomic charges of diazaallyl, aryl, and electron-withdrawing groups of  $2c^-$  ( $S_0$ ).

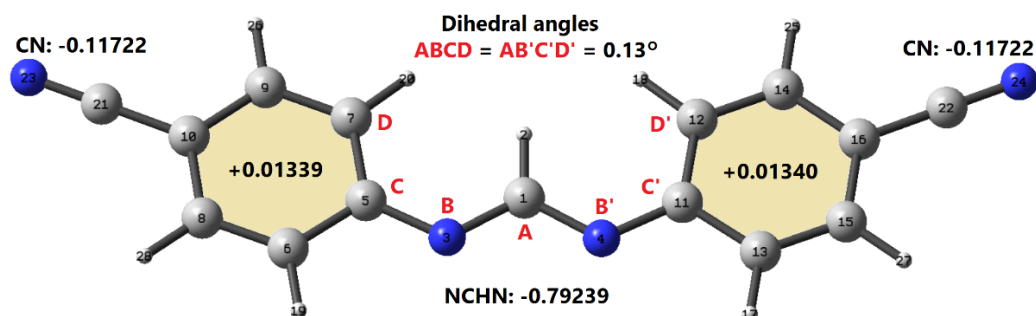

**Figure S46.** Dihedral angles and the sum of natural atomic charges of diazaallyl, aryl, and electron-withdrawing groups of  $2c^-$  ( $S_1$ ).

**Table S9.** Natural atomic charges of  $2c^-$  at the  $S_0$  and  $S_1$  states.

| $S_0$      |                  |            |                  |            |                  | $S_1$      |                  |            |                  |            |                  |
|------------|------------------|------------|------------------|------------|------------------|------------|------------------|------------|------------------|------------|------------------|
| NCHN       | NPA ( $\delta$ ) | Ar1        | NPA ( $\delta$ ) | Ar2        | NPA ( $\delta$ ) | NCHN       | NPA ( $\delta$ ) | Ar1        | NPA ( $\delta$ ) | Ar2        | NPA ( $\delta$ ) |
| C          | 1                | 0.30516    | C                | 5          | 0.18639          | C          | 1                | 0.31500    | C                | 5          | 0.18845          |
| H          | 2                | 0.12759    | C                | 6          | -0.23413         | C          | 2                | 0.13595    | C                | 6          | -0.23790         |
| N          | 3                | -0.63236   | C                | 7          | -0.26689         | N          | 3                | -0.62167   | C                | 7          | -0.26360         |
| N          | 4                | -0.63236   | C                | 8          | -0.15019         | N          | 4                | -0.62167   | C                | 8          | -0.14674         |
|            |                  |            | C                | 9          | -0.14309         |            |                  |            | C                | 9          | -0.14402         |
|            |                  |            | C                | 10         | -0.26131         |            |                  |            | C                | 10         | -0.26613         |
|            |                  |            | H                | 19         | 0.22178          |            |                  |            | H                | 19         | 0.22098          |
|            |                  |            | H                | 20         | 0.22126          |            |                  |            | H                | 20         | 0.21592          |
|            |                  |            | C                | 22         | 0.34453          |            |                  |            | C                | 22         | 0.34074          |
|            |                  |            | N                | 24         | -0.45032         |            |                  |            | N                | 24         | -0.45796         |
|            |                  |            | H                | 26         | 0.22364          |            |                  |            | H                | 26         | 0.22205          |
|            |                  |            | H                | 28         | 0.22433          |            |                  |            | H                | 28         | 0.22438          |
| <b>sum</b> | <b>-0.83197</b>  | <b>sum</b> | <b>-0.08400</b>  | <b>sum</b> | <b>-0.08400</b>  | <b>sum</b> | <b>-0.79239</b>  | <b>sum</b> | <b>-0.10383</b>  | <b>sum</b> | <b>-0.10382</b>  |
|            |                  | aryl       | 0.02179          | aryl       | 0.02179          |            |                  | aryl       | 0.01339          | aryl       | 0.01340          |
|            |                  | EWG        | -0.10579         | EWG        | -0.10579         |            |                  | EWG        | -0.11722         | EWG        | -0.11722         |

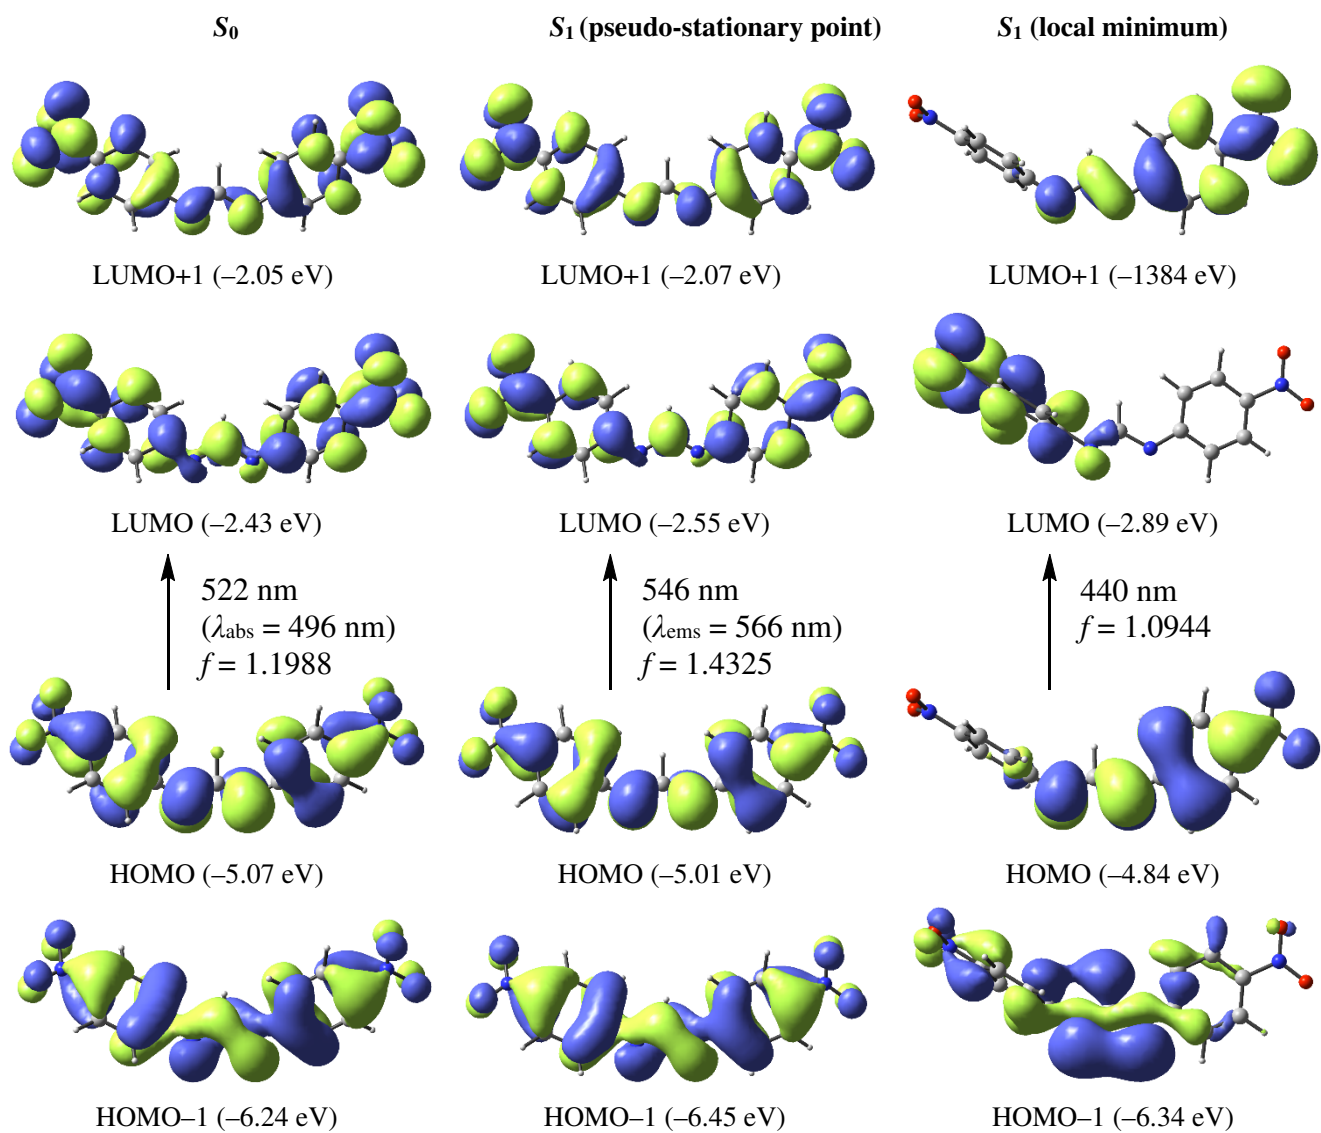

**Figure S47.**  $S_0$ - and  $S_1$ -state MOs, orbital energies, excitation energies, and oscillator strengths of **2d<sup>-</sup>**.

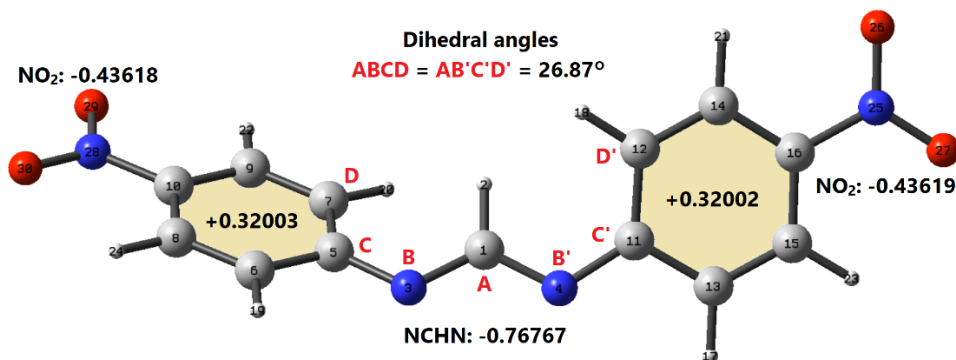

**Figure S48.** Dihedral angles and the sum of natural atomic charges of diazaallyl, aryl, and electron-withdrawing groups of  $2d^-$  ( $S_0$ ).

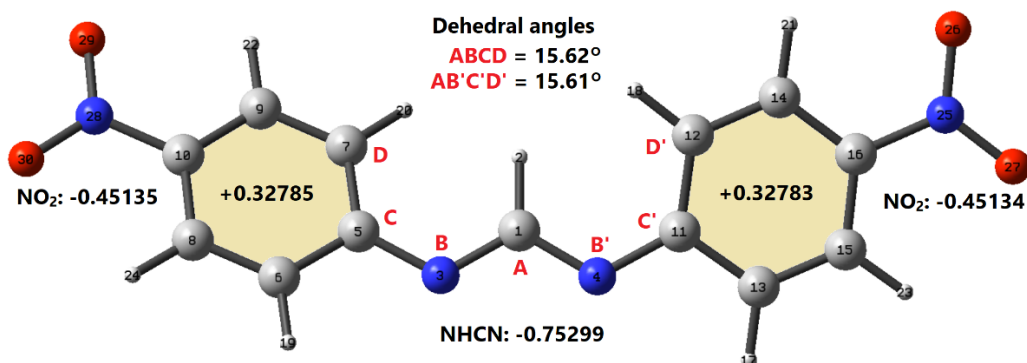

**Figure S49.** Dihedral angles and the sum of natural atomic charges of diazaallyl, aryl, and electron-withdrawing groups of  $2d^-$  (pseudo-stationary point at  $S_1$ ).

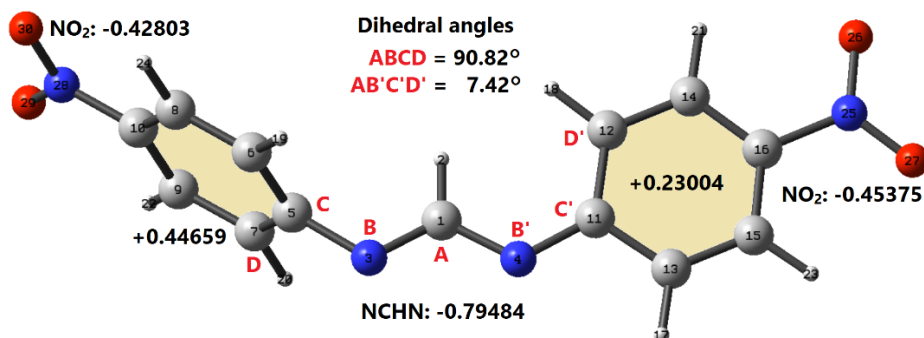

**Figure S50.** Dihedral angles and the sum of natural atomic charges of diazaallyl, aryl, and electron-withdrawing groups of  $2d^-$  (local minimum at  $S_1$ ).

**Table S10.** Natural atomic charges of **2d<sup>-</sup>** at the  $S_0$  and  $S_1$  (a pseudo-stationary point and a local minimum) states.

| $S_0$      |                  |            |                  |            |                  | $S_1$ (a pseudo-stationary point) |                  |            |                  |            |                  |
|------------|------------------|------------|------------------|------------|------------------|-----------------------------------|------------------|------------|------------------|------------|------------------|
| NCHN       | NPA ( $\delta$ ) | Ar1        | NPA ( $\delta$ ) | Ar2        | NPA ( $\delta$ ) | NCHN                              | NPA ( $\delta$ ) | Ar1        | NPA ( $\delta$ ) | Ar2        | NPA ( $\delta$ ) |
| C          | 1                | 0.30981    | C                | 5          | 0.19839          | C                                 | 11               | 0.19839    | C                | 11         | 0.19277          |
| H          | 2                | 0.13514    | C                | 6          | -0.22588         | C                                 | 12               | -0.25843   | C                | 12         | -0.25387         |
| N          | 3                | -0.60631   | C                | 7          | -0.25843         | C                                 | 13               | -0.22588   | C                | 13         | -0.22266         |
| N          | 4                | -0.60631   | C                | 8          | -0.17585         | C                                 | 14               | -0.16821   | C                | 14         | -0.16775         |
|            |                  |            | C                | 9          | -0.16821         | C                                 | 15               | -0.17585   | C                | 15         | -0.17447         |
|            |                  |            | C                | 10         | 0.02355          | C                                 | 16               | 0.02355    | C                | 16         | 0.02814          |
|            |                  |            | H                | 19         | 0.22402          | H                                 | 17               | 0.22402    | H                | 19         | 0.22498          |
|            |                  |            | H                | 20         | 0.22293          | H                                 | 18               | 0.22292    | H                | 20         | 0.22053          |
|            |                  |            | H                | 22         | 0.23956          | H                                 | 21               | 0.23956    | H                | 22         | 0.23949          |
|            |                  |            | H                | 24         | 0.23995          | H                                 | 23               | 0.23995    | H                | 24         | 0.24067          |
|            |                  |            | N                | 28         | 0.47420          | N                                 | 25               | 0.47420    | N                | 28         | 0.46527          |
|            |                  |            | O                | 29         | -0.45545         | O                                 | 26               | -0.45545   | O                | 29         | -0.45871         |
|            |                  |            | O                | 30         | -0.45494         | O                                 | 27               | -0.45493   | O                | 30         | -0.45791         |
| <b>sum</b> | <b>-0.76767</b>  | <b>sum</b> | <b>-0.11616</b>  | <b>sum</b> | <b>-0.11616</b>  | <b>sum</b>                        | <b>-0.75299</b>  | <b>sum</b> | <b>-0.12350</b>  | <b>sum</b> | <b>-0.12351</b>  |
|            |                  | aryl       | 0.32003          | aryl       | 0.32002          |                                   |                  | aryl       | 0.32785          | aryl       | 0.32783          |
|            |                  | EWG        | -0.43619         | EWG        | -0.43618         |                                   |                  | EWG        | -0.45135         | EWG        | -0.45134         |

| $S_1$ (a local minimum) |                  |            |                  |            |                  |   |    |          |
|-------------------------|------------------|------------|------------------|------------|------------------|---|----|----------|
| NCHN                    | NPA ( $\delta$ ) | Ar1        | NPA ( $\delta$ ) | Ar2        | NPA ( $\delta$ ) |   |    |          |
| C                       | 1                | 0.30126    | C                | 5          | 0.21516          | C | 11 | 0.19728  |
| H                       | 2                | 0.13743    | C                | 6          | -0.23364         | C | 12 | -0.27610 |
| N                       | 3                | -0.57591   | C                | 7          | -0.23384         | C | 13 | -0.23729 |
| N                       | 4                | -0.65762   | C                | 8          | -0.14610         | C | 14 | -0.17874 |
|                         |                  |            | C                | 9          | -0.14598         | C | 15 | -0.18955 |
|                         |                  |            | C                | 10         | 0.03995          | C | 16 | 0.00696  |
|                         |                  |            | H                | 19         | 0.23273          | H | 17 | 0.21907  |
|                         |                  |            | H                | 20         | 0.23284          | H | 18 | 0.21435  |
|                         |                  |            | H                | 22         | 0.24276          | H | 21 | 0.23626  |
|                         |                  |            | H                | 24         | 0.24271          | H | 23 | 0.23780  |
|                         |                  |            | N                | 28         | 0.44543          | N | 25 | 0.48002  |
|                         |                  |            | O                | 29         | -0.43666         | O | 26 | -0.46726 |
|                         |                  |            | O                | 30         | -0.43680         | O | 27 | -0.46651 |
| <b>sum</b>              | <b>-0.79484</b>  | <b>sum</b> | <b>0.01856</b>   | <b>sum</b> | <b>-0.22371</b>  |   |    |          |
|                         |                  | aryl       | 0.44659          | aryl       | 0.23004          |   |    |          |
|                         |                  | EWG        | -0.42803         | EWG        | -0.45375         |   |    |          |



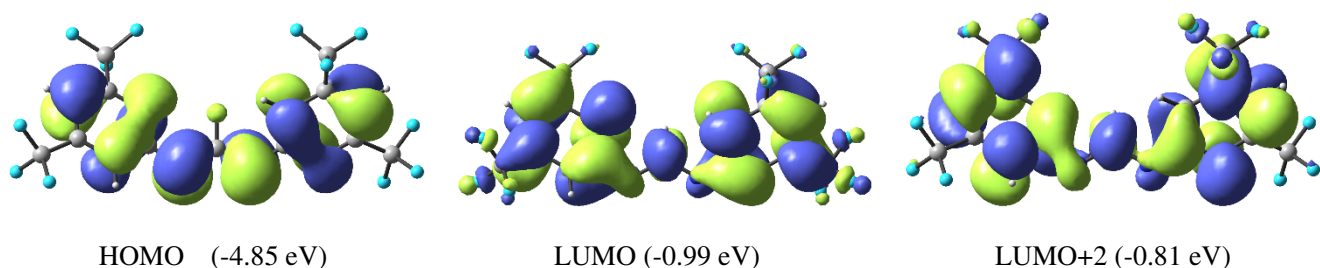

**Figure S51.** Frontier orbitals for the ground state ( $S_0$ ) of  $2e^-$ .

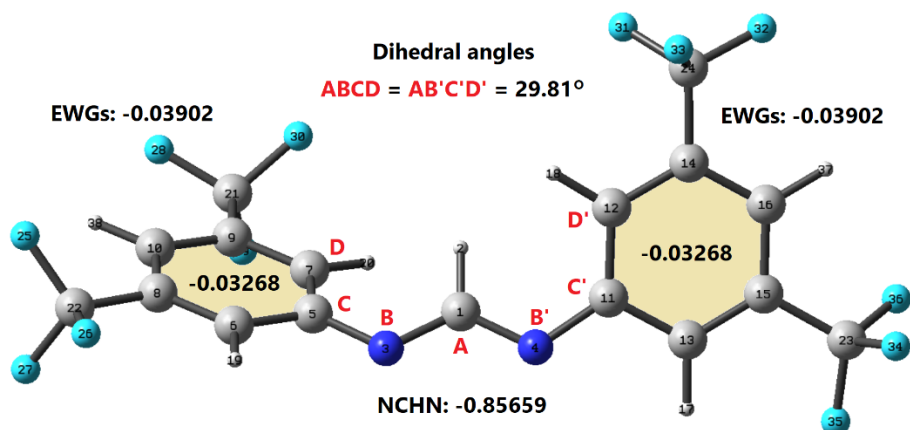

**Figure S52.** Dihedral angles and the sum of natural atomic charges of diazaallyl, aryl, and electron-withdrawing groups of  $2e^-$  ( $S_0$ ).

**Table S11.** Natural atomic charges of  $2e^-$  at the  $S_0$  state.

|            |                  | $S_0$      |                  |            |                  |
|------------|------------------|------------|------------------|------------|------------------|
| NCHN       | NPA ( $\delta$ ) | Ar1        | NPA ( $\delta$ ) | Ar2        | NPA ( $\delta$ ) |
| C          | 1                | 0.30255    | C                | 5          | 0.16823          |
| H          | 2                | 0.12508    | C                | 6          | -0.17870         |
| N          | 3                | -0.64211   | C                | 7          | -0.22101         |
| N          | 4                | -0.64211   | C                | 8          | -0.15311         |
|            |                  |            | C                | 9          | -0.14664         |
|            |                  |            | C                | 10         | -0.20924         |
|            |                  |            | H                | 19         | 0.23490          |
|            |                  |            | H                | 20         | 0.23155          |
|            |                  |            | C                | 21         | 1.09014          |
|            |                  |            | C                | 22         | 1.09040          |
|            |                  |            | F                | 25         | -0.37099         |
|            |                  |            | F                | 26         | -0.36551         |
|            |                  |            | F                | 27         | -0.37329         |
|            |                  |            | F                | 28         | -0.36781         |
|            |                  |            | F                | 29         | -0.37229         |
|            |                  |            | F                | 30         | -0.36967         |
|            |                  |            | H                | 38         | 0.24134          |
| <b>sum</b> | <b>-0.85659</b>  | <b>sum</b> | <b>-0.07170</b>  | <b>sum</b> | <b>-0.07170</b>  |
|            |                  | aryl       | -0.03268         | aryl       | -0.03268         |
|            |                  | EWG        | -0.03902         | EWG        | -0.03902         |



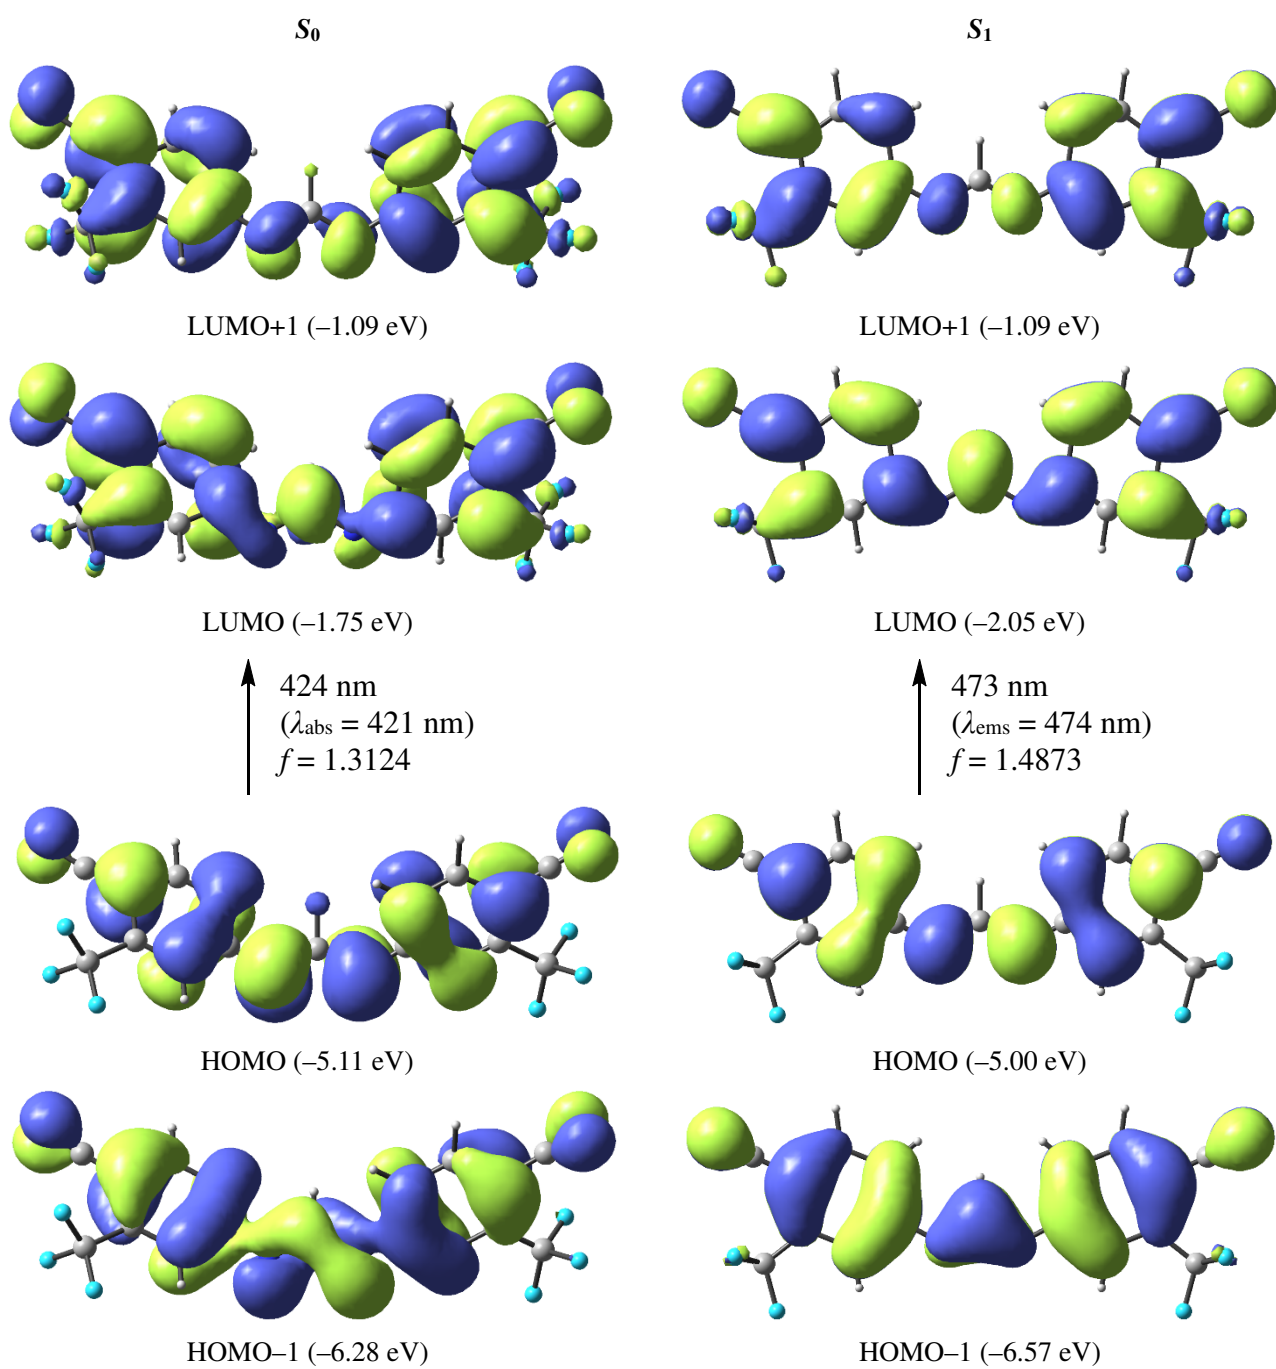

**Figure S53.**  $S_0$ - and  $S_1$ -state MOs, orbital energies, excitation energies, and oscillator strengths of  $2\mathbf{f}^-$ .

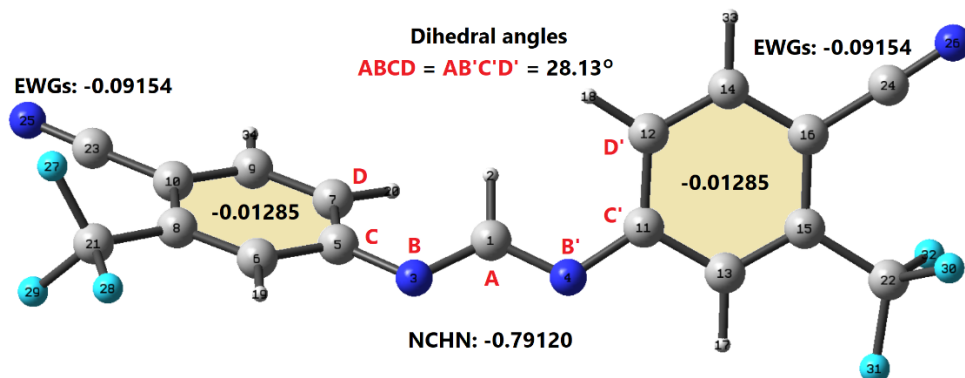

**Figure S54.** Dihedral angles and the sum of natural atomic charges of diazaallyl, aryl, and electron-withdrawing groups of  $2f^- (S_0)$ .

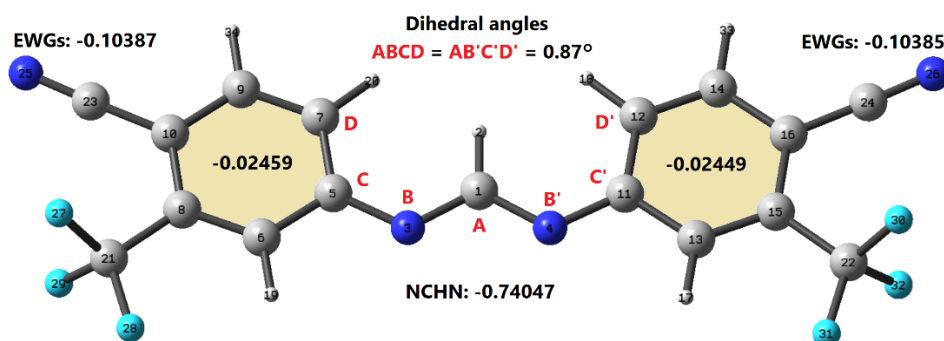

**Figure S55.** Dihedral angles and the sum of natural atomic charges of diazaallyl, aryl, and electron-withdrawing groups of  $2f^- (S_1)$ .

**Table S12.** Natural atomic charges of  $2f^-$  at the  $S_0$  and  $S_1$  states.

|            |                  | $S_0$      |                  |            |                  | $S_1$      |                  |            |                  |            |                  |
|------------|------------------|------------|------------------|------------|------------------|------------|------------------|------------|------------------|------------|------------------|
| NCHN       | NPA ( $\delta$ ) | Ar1        | NPA ( $\delta$ ) | Ar2        | NPA ( $\delta$ ) | NCHN       | NPA ( $\delta$ ) | Ar1        | NPA ( $\delta$ ) | Ar2        | NPA ( $\delta$ ) |
| C          | 1                | 0.31055    | C                | 5          | 0.19177          | C          | 1                | 0.40670    | C                | 5          | 0.18121          |
| H          | 2                | 0.13237    | C                | 6          | -0.19014         | C          | 2                | 0.12782    | C                | 6          | -0.18479         |
| N          | 3                | -0.61706   | C                | 7          | -0.24855         | C          | 3                | -0.63750   | C                | 7          | -0.24301         |
| N          | 4                | -0.61706   | C                | 8          | -0.10396         | C          | 4                | -0.63749   | C                | 8          | -0.10983         |
|            |                  |            | C                | 9          | -0.12827         | C          | 5                | -0.13193   | C                | 9          | -0.10980         |
|            |                  |            | C                | 10         | -0.23177         | C          | 6                | -0.23152   | C                | 10         | -0.23153         |
|            |                  |            | H                | 17         | 0.24025          | C          | 7                | 0.24397    | H                | 17         | 0.24402          |
|            |                  |            | H                | 18         | 0.22702          | H          | 18               | 0.22196    | H                | 18         | 0.22196          |
|            |                  |            | C                | 22         | 1.08851          | C          | 21               | 1.08757    | C                | 21         | 1.08758          |
|            |                  |            | C                | 24         | 0.33003          | C          | 22               | 1.08757    | C                | 22         | 1.08757          |
|            |                  |            | N                | 26         | -0.41698         | C          | 23               | 0.32637    | C                | 23         | 0.32637          |
|            |                  |            | F                | 30         | -0.36570         | N          | 26               | -0.42214   | N                | 26         | -0.42214         |
|            |                  |            | F                | 31         | -0.36128         | F          | 30               | -0.36727   | F                | 30         | -0.36727         |
|            |                  |            | F                | 32         | -0.36612         | F          | 27               | -0.36612   | F                | 27         | -0.36722         |
|            |                  |            | F                | 32         | -0.36612         | F          | 28               | -0.36128   | F                | 28         | -0.36117         |
|            |                  |            | H                | 33         | 0.23080          | F          | 29               | -0.36570   | F                | 29         | -0.36727         |
|            |                  |            |                  |            | H                | 34         | 0.23080          | H          | 33               | 0.22935    |                  |
| <b>sum</b> | <b>-0.79120</b>  | <b>sum</b> | <b>-0.10439</b>  | <b>sum</b> | <b>-0.10439</b>  | <b>sum</b> | <b>-0.74047</b>  | <b>sum</b> | <b>-0.12846</b>  | <b>sum</b> | <b>-0.12846</b>  |
|            |                  | aryl       | -0.01285         | aryl       | -0.01285         |            |                  | aryl       | -0.02459         | aryl       | -0.02459         |
|            |                  | EWG        | -0.09154         | EWG        | -0.09154         |            |                  | EWG        | -0.10387         | EWG        | -0.10387         |

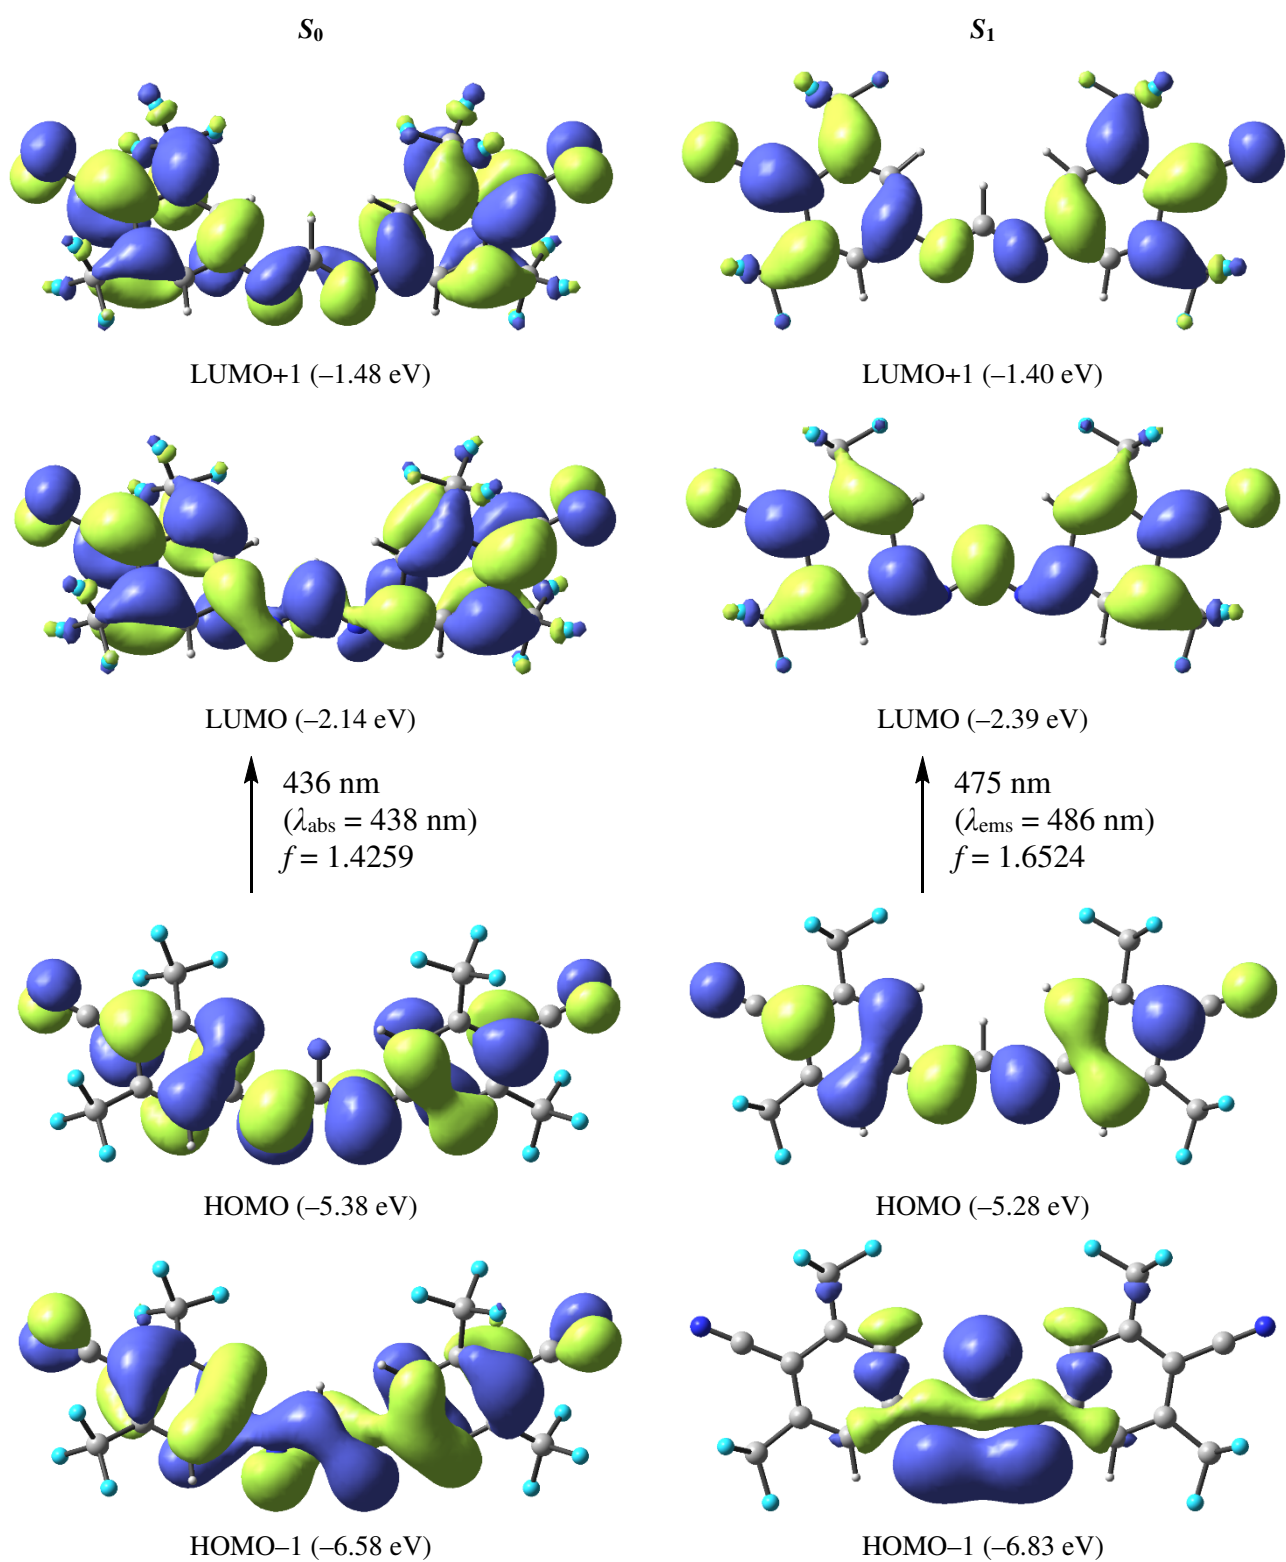

**Figure S56.**  $S_0$ - and  $S_1$ -state MOs, orbital energies, excitation energies, and oscillator strengths of  $2g^-$ .



**Table S14.** Summary of the calculated photoexcitation parameters

|                       | state | frontier orbitals | $E_{EX}$ (eV) | wavelengths (nm)           |                 |                            | $\lambda_{EM}$ | oscillator strength $f$ |
|-----------------------|-------|-------------------|---------------|----------------------------|-----------------|----------------------------|----------------|-------------------------|
|                       |       |                   |               | calcd. $\lambda_{S_0-S_1}$ | $\lambda_{ABS}$ | calcd. $\lambda_{S_1-S_0}$ |                |                         |
| <b>2a<sup>-</sup></b> | $S_0$ | HOMO/LUMO         | 2.96          | 419                        | 411             | —                          | —              | 1.4223                  |
|                       | $S_1$ | HOMO/LUMO         | 2.69          | —                          | —               | 461                        | 471            | 1.6962                  |
| <b>2b<sup>-</sup></b> | $S_0$ | HOMO/LUMO         | 3.22          | 385                        | 391             | —                          | —              | 1.3051                  |
|                       | $S_1$ | HOMO/LUMO         | 2.85          | —                          | —               | 434                        | 446            | 1.4892                  |
| <b>2c<sup>-</sup></b> | $S_0$ | HOMO/LUMO         | 3.07          | 403                        | 402             | —                          | —              | 1.4259                  |
|                       | $S_1$ | HOMO/LUMO         | 2.75          | —                          | —               | 451                        | 457            | 1.6524                  |
| <b>2d<sup>-</sup></b> | $S_0$ | HOMO/LUMO         | 2.39          | 519                        | 496             | —                          | —              | 1.1988                  |
|                       | $S_1$ | HOMO/LUMO         | 2.27          | —                          | —               | 546                        | 566            | 1.4325                  |
| <b>2e<sup>-</sup></b> | $S_0$ | HOMO/LUMO         | 3.27          | 379                        | —               | —                          | —              | 0.1734                  |
|                       |       | HOMO/LUMO+2       | 3.48          | 356                        | 355             | —                          | 436            | 0.8568                  |
| <b>2f<sup>-</sup></b> | $S_0$ | HOMO/LUMO         | 2.94          | 424                        | 421             | —                          | —              | 1.3124                  |
|                       | $S_1$ | HOMO/LUMO         | 2.62          | —                          | —               | 473                        | 474            | 1.4873                  |
| <b>2g<sup>-</sup></b> | $S_0$ | HOMO/LUMO         | 2.87          | 436                        | 438             | —                          | —              | 1.3913                  |
|                       | $S_1$ | HOMO/LUMO         | 2.70          | —                          | —               | 475                        | 486            | 1.6759                  |

## (J-2) Cartesian Coordinates of DFT-Optimized States

Singlet ground state ( $S_0$ ) of  $2a^-$

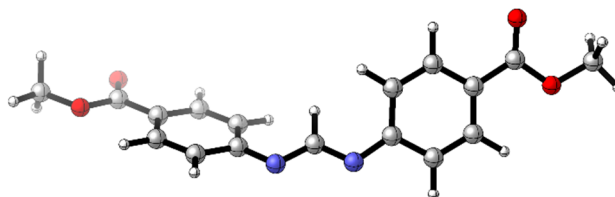

$E_{298}(\text{B3LYP}) = -1067.49364381$  Hartree

$E_{298}(\text{TD-B3LYP}) = -1067.38452088$  Hartree

$G_{298}(\text{B3LYP}) = -1067.56759381$  Hartree

$G_{298}(\text{TD-B3LYP}) = -1067.45847088$  Hartree

-1 1

|   |           |           |           |   |           |           |           |
|---|-----------|-----------|-----------|---|-----------|-----------|-----------|
| C | 0.000042  | 1.220719  | -0.000634 | H | -3.790630 | -1.611825 | 1.429885  |
| H | 0.000066  | 0.116603  | -0.000275 | H | 3.790814  | -1.612650 | -1.429214 |
| N | 1.157712  | 1.852775  | 0.128877  | H | -5.559413 | 1.355406  | -1.125707 |
| N | -1.157656 | 1.852645  | -0.130550 | H | 5.559411  | 1.356215  | 1.124613  |
| C | 2.322971  | 1.131197  | 0.016491  | C | -6.091238 | -0.964626 | 0.258756  |
| C | 3.483054  | 1.621847  | 0.674305  | O | -6.257780 | -1.996619 | 0.903746  |
| C | 2.475851  | -0.053545 | -0.759755 | O | -7.102607 | -0.389278 | -0.441129 |
| C | 4.696746  | 0.960126  | 0.600691  | C | 6.091313  | -0.964760 | -0.258251 |
| C | 3.693170  | -0.713401 | -0.829225 | O | 6.257908  | -1.997150 | -0.902591 |
| C | 4.825439  | -0.228521 | -0.148571 | O | 7.102602  | -0.389036 | 0.441441  |
| C | -2.322892 | 1.131107  | -0.017665 | C | -8.374592 | -1.057369 | -0.383657 |
| C | -2.475713 | -0.053153 | 0.759330  | H | -9.043607 | -0.460133 | -1.002224 |
| C | -3.483018 | 1.621325  | -0.675727 | H | -8.292597 | -2.072520 | -0.779140 |
| C | -3.693029 | -0.712961 | 0.829314  | H | -8.740316 | -1.097814 | 0.645114  |
| C | -4.696708 | 0.959656  | -0.601594 | C | 8.374563  | -1.057223 | 0.384570  |
| C | -4.825353 | -0.228501 | 0.148452  | H | 9.043505  | -0.459660 | 1.002898  |
| H | -3.390056 | 2.534285  | -1.255895 | H | 8.292449  | -2.072139 | 0.780630  |
| H | -1.635871 | -0.430072 | 1.333105  | H | 8.740454  | -1.098287 | -0.644118 |
| H | 3.390048  | 2.535179  | 1.253880  |   |           |           |           |
| H | 1.636047  | -0.430819 | -1.333354 |   |           |           |           |

Singlet excited state ( $S_1$ ) of  $2a^-$

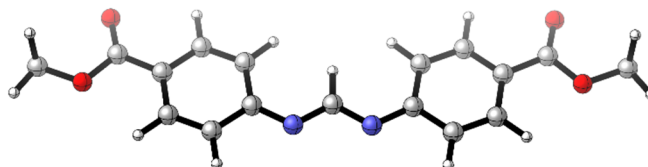

$E_{298}(\text{B3LYP}) = -1067.49025005$  Hartree

$E_{298}(\text{TD-B3LYP}) = -1067.39146512$  Hartree

$G_{298}(\text{B3LYP}) = -1067.56074105$  Hartree

$G_{298}(\text{TD-B3LYP}) = -1067.46195612$  Hartree

-1 1

|   |           |           |           |   |           |           |           |
|---|-----------|-----------|-----------|---|-----------|-----------|-----------|
| C | 0.000003  | 0.749196  | -0.000068 | H | 4.023943  | -2.198059 | 0.097586  |
| H | 0.000004  | -0.344069 | 0.000014  | H | -4.023927 | -2.198085 | -0.097382 |
| N | -1.148132 | 1.435631  | -0.034781 | H | 5.650880  | 1.796069  | 0.127222  |
| N | 1.148136  | 1.435640  | 0.034546  | H | -5.649878 | 1.796034  | -0.127464 |
| C | -2.359330 | 0.807542  | -0.064602 | C | 6.330624  | -0.881030 | 0.130054  |
| C | -3.515227 | 1.646817  | -0.088807 | O | 6.569698  | -2.094437 | 0.132308  |
| C | -2.585068 | -0.613123 | -0.070619 | O | 7.335765  | 0.044996  | 0.142881  |
| C | -4.795128 | 1.130215  | -0.111313 | C | -6.330614 | -0.881068 | -0.129983 |
| C | -3.866923 | -1.124302 | -0.093999 | O | -6.569683 | -2.094476 | -0.132107 |
| C | -5.003470 | -0.277533 | -0.112629 | O | -7.335757 | 0.044954  | -0.142892 |
| C | 2.359336  | 0.807559  | 0.064447  | C | 8.672928  | -0.474865 | 0.158134  |
| C | 2.585079  | -0.613105 | 0.070630  | H | 9.325115  | 0.398397  | 0.164794  |
| C | 3.515230  | 1.646841  | 0.088559  | H | 8.841741  | -1.081996 | 1.051388  |
| C | 3.866935  | -1.124276 | 0.094079  | H | 8.861527  | -1.083326 | -0.730276 |
| C | 4.795132  | 1.130245  | 0.111139  | C | -8.672919 | -0.474913 | -0.158046 |
| C | 5.003479  | -0.277502 | 0.112620  | H | -9.325109 | 0.398346  | -0.164792 |
| H | 3.352857  | 2.720626  | 0.086175  | H | -8.841756 | -1.082152 | -1.051221 |
| H | 1.750143  | -1.303743 | 0.056775  | H | -8.861491 | -1.083268 | 0.730443  |
| H | -3.352858 | 2.720603  | -0.086551 |   |           |           |           |
| H | -1.750130 | -1.303757 | -0.056692 |   |           |           |           |

Singlet ground state ( $S_0$ ) of  $2b^-$

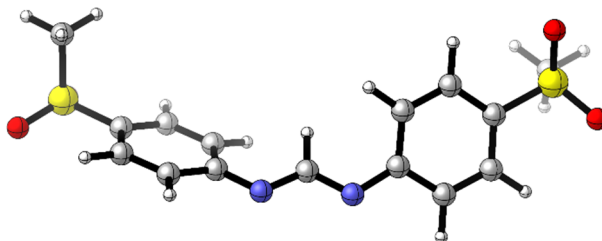

$E_{298}(\text{B3LYP}) = -1787.63044753$  Hartree

$E_{298}(\text{TD-B3LYP}) = -1787.51193383$  Hartree

$G_{298}(\text{B3LYP}) = -1787.70787953$  Hartree

$G_{298}(\text{TD-B3LYP}) = -1787.58936583$  Hartree

-1 1

|   |           |           |           |   |           |           |           |
|---|-----------|-----------|-----------|---|-----------|-----------|-----------|
| C | -0.028481 | -0.934253 | -0.543316 | H | 3.729904  | 0.831890  | 2.138480  |
| H | -0.023411 | 0.043745  | -0.029450 | H | -3.762955 | 2.305735  | -0.591711 |
| N | -1.191876 | -1.535877 | -0.742925 | H | 5.555169  | -0.573542 | -1.499567 |
| N | 1.129173  | -1.449143 | -0.930331 | H | -5.616159 | -1.477245 | 0.301884  |
| C | -2.348392 | -0.824430 | -0.529424 | S | -6.337610 | 1.317754  | 0.243763  |
| C | -3.522998 | -1.545808 | -0.184256 | O | -6.350000 | 2.614847  | -0.477617 |
| C | -2.473781 | 0.585808  | -0.684357 | O | -7.459495 | 0.371213  | 0.024192  |
| C | -4.731919 | -0.907035 | 0.038084  | S | 6.297187  | 0.952587  | 0.836777  |
| C | -3.682240 | 1.231872  | -0.459124 | O | 6.319434  | 1.087987  | 2.314646  |
| C | -4.811527 | 0.488217  | -0.094289 | O | 7.411522  | 0.232339  | 0.171835  |
| C | 2.291977  | -0.876977 | -0.471885 | C | 6.258805  | 2.620175  | 0.150601  |
| C | 2.427708  | -0.208752 | 0.778444  | H | 6.169794  | 2.544934  | -0.933684 |
| C | 3.461304  | -1.005040 | -1.269156 | H | 5.407202  | 3.149888  | 0.578628  |
| C | 3.641046  | 0.335963  | 1.177585  | H | 7.198285  | 3.099585  | 0.432506  |
| C | 4.675103  | -0.466116 | -0.874587 | C | -6.295860 | 1.690998  | 2.007742  |
| C | 4.764927  | 0.212083  | 0.351273  | H | -6.217066 | 0.752138  | 2.556845  |
| H | 3.379352  | -1.536951 | -2.211598 | H | -5.437365 | 2.334032  | 2.204185  |
| H | 1.580198  | -0.153806 | 1.452626  | H | -7.230003 | 2.203977  | 2.244602  |
| H | -3.448202 | -2.624386 | -0.091018 |   |           |           |           |
| H | -1.622208 | 1.167144  | -1.020122 |   |           |           |           |

Singlet excited state ( $S_1$ ) of  $2b^-$

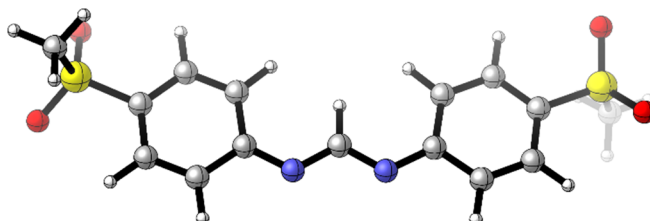

$E_{298}(\text{B3LYP}) = -1787.62632704$  Hartree

$E_{298}(\text{TD-B3LYP}) = -1787.52146094$  Hartree

$G_{298}(\text{B3LYP}) = -1787.69941004$  Hartree

$G_{298}(\text{TD-B3LYP}) = -1787.59454394$  Hartree

-1 1

|   |           |           |           |   |           |           |           |
|---|-----------|-----------|-----------|---|-----------|-----------|-----------|
| C | 0.011399  | 0.849946  | -0.007706 | H | -1.714361 | -1.207049 | -0.054740 |
| H | 0.016711  | -0.238994 | 0.072550  | H | 3.371682  | 2.818316  | -0.176228 |
| N | 1.158222  | 1.541056  | -0.096221 | H | 1.735419  | -1.201281 | -0.112361 |
| N | -1.141487 | 1.536753  | -0.002157 | H | -3.978362 | -2.128536 | 0.025919  |
| C | 2.364528  | 0.910796  | -0.124723 | H | 4.002788  | -2.116822 | -0.102989 |
| C | 3.526175  | 1.743715  | -0.154810 | H | -5.650196 | 1.854237  | 0.216529  |
| C | 2.575190  | -0.517539 | -0.112499 | H | 5.671117  | 1.871456  | -0.187241 |
| C | 4.804382  | 1.220859  | -0.154747 | S | 6.588523  | -0.874644 | -0.012894 |
| C | 3.853200  | -1.042295 | -0.109943 | O | 6.551142  | -2.286507 | -0.476487 |
| C | 4.973430  | -0.187658 | -0.132032 | O | 7.560491  | 0.059158  | -0.639469 |
| C | -2.345691 | 0.902749  | 0.033143  | S | -6.568051 | -0.891391 | 0.083590  |
| C | -2.553970 | -0.525843 | 0.005357  | O | -6.503031 | -2.310573 | 0.520940  |
| C | -3.507938 | 1.732519  | 0.101427  | O | -7.506261 | 0.030026  | 0.776945  |
| C | -3.830092 | -1.053975 | 0.046436  | C | -7.057071 | -0.906910 | -1.657227 |
| C | -4.783674 | 1.206152  | 0.148057  | H | -7.035450 | 0.118153  | -2.029277 |
| C | -4.949973 | -0.202675 | 0.128156  | H | -6.357685 | -1.538870 | -2.205823 |
| H | -3.355495 | 2.807323  | 0.125390  | H | -8.069213 | -1.315064 | -1.702265 |



|   |          |           |          |   |          |           |          |
|---|----------|-----------|----------|---|----------|-----------|----------|
| C | 6.980109 | -0.920281 | 1.752010 | H | 6.251854 | -1.562890 | 2.248352 |
| H | 6.934863 | 0.097871  | 2.140553 | H | 7.988835 | -1.328255 | 1.847241 |

Singlet ground state ( $S_0$ ) of  $2e^-$

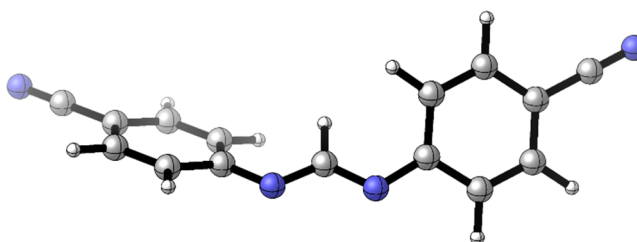

$E_{298}(\text{B3LYP}) = -796.21197985$  Hartree

$E_{298}(\text{TD-B3LYP}) = -796.09943089$  Hartree

$G_{298}(\text{B3LYP}) = -796.27277885$  Hartree

$G_{298}(\text{TD-B3LYP}) = -796.16022989$  Hartree

-1 1

|   |           |           |           |   |           |           |           |
|---|-----------|-----------|-----------|---|-----------|-----------|-----------|
| C | -0.000011 | -0.912777 | -0.000193 | C | 4.820659  | 0.526624  | 0.046865  |
| H | 0.000002  | 0.191384  | 0.000104  | H | 3.358585  | -2.232446 | -1.326993 |
| N | -1.154052 | -1.545330 | 0.154327  | H | 1.663299  | 0.734926  | 1.299526  |
| N | 1.154015  | -1.545276 | -0.155055 | H | -3.358644 | -2.233080 | 1.325871  |
| C | -2.320889 | -0.825974 | 0.066114  | H | -1.663273 | 0.735654  | -1.299049 |
| C | -3.465322 | -1.320097 | 0.749047  | C | -6.070196 | 1.206536  | -0.099193 |
| C | -2.490036 | 0.358067  | -0.707721 | C | 6.070251  | 1.206289  | 0.099975  |
| C | -4.681359 | -0.663018 | 0.703147  | N | -7.095493 | 1.764810  | -0.139210 |
| C | -3.706363 | 1.021084  | -0.755045 | N | 7.095571  | 1.764497  | 0.140313  |
| C | -4.820631 | 0.526792  | -0.046472 | H | 3.810233  | 1.919040  | 1.356074  |
| C | 2.320871  | -0.825996 | -0.066465 | H | -3.810165 | 1.919881  | -1.354934 |
| C | 2.490053  | 0.357625  | 0.708004  | H | 5.535248  | -1.057205 | -1.244882 |
| C | 3.465288  | -1.319782 | -0.749669 | H | -5.535272 | -1.057721 | 1.244408  |
| C | 3.706403  | 1.020573  | 0.755696  |   |           |           |           |
| C | 4.681348  | -0.662769 | -0.703407 |   |           |           |           |

Singlet excited state ( $S_1$ ) of  $2e^-$

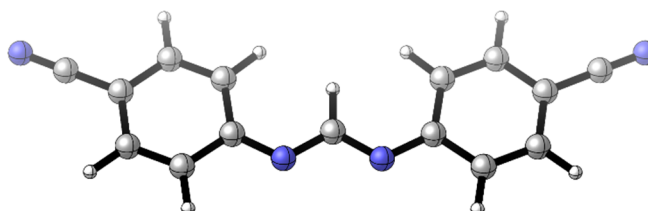

$E_{298}(\text{B3LYP}) = -796.20838020$  Hartree

$E_{298}(\text{TD-B3LYP}) = -796.10744435$  Hartree

$G_{298}(\text{B3LYP}) = -796.26651320$  Hartree

$G_{298}(\text{TD-B3LYP}) = -796.16557735$  Hartree

-1 1

|   |           |           |           |   |           |           |           |
|---|-----------|-----------|-----------|---|-----------|-----------|-----------|
| C | 0.000001  | -0.637895 | 0.000002  | C | -4.989893 | 0.397989  | 0.064281  |
| H | 0.000001  | 0.454658  | 0.000007  | H | -3.359638 | -2.608422 | 0.063577  |
| N | 1.149814  | -1.326444 | -0.020945 | H | -1.738108 | 1.413756  | 0.012518  |
| N | -1.149813 | -1.326444 | 0.020942  | H | 3.359639  | -2.608422 | -0.063595 |
| C | 2.357074  | -0.698384 | -0.035938 | H | 1.738109  | 1.413756  | -0.012495 |
| C | 3.517207  | -1.534262 | -0.058255 | C | 6.292623  | 0.948101  | -0.076944 |
| C | 2.575628  | 0.727151  | -0.029258 | C | -6.292622 | 0.948101  | 0.076951  |
| C | 4.794486  | -1.016157 | -0.071995 | N | 7.375138  | 1.400747  | -0.088159 |
| C | 3.852216  | 1.248227  | -0.042832 | N | -7.375137 | 1.400747  | 0.087168  |
| C | 4.989895  | 0.397989  | -0.064276 | H | -3.997004 | 2.324199  | 0.036861  |
| C | -2.357073 | -0.698384 | 0.035940  | H | 3.997006  | 2.324198  | -0.036836 |
| C | -2.575626 | 0.727151  | 0.029273  | H | -5.655955 | -1.675306 | 0.088297  |
| C | -3.517206 | -1.534261 | 0.058247  | H | 5.655956  | -1.675306 | -0.088312 |
| C | -3.852214 | 1.248228  | 0.042847  |   |           |           |           |
| C | -4.794485 | -1.016157 | 0.071988  |   |           |           |           |



Singlet ground state ( $S_0$ ) of  $2d^-$

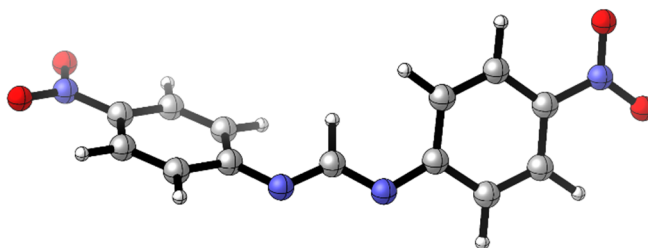

$E_{298}(\text{B3LYP}) = -1020.81488623$  Hartree

$E_{298}(\text{TD-B3LYP}) = -1020.72768105$  Hartree

$G_{298}(\text{B3LYP}) = -1020.87972223$  Hartree

$G_{298}(\text{TD-B3LYP}) = -1020.79251705$  Hartree

-1 1

|   |           |           |           |   |           |           |           |
|---|-----------|-----------|-----------|---|-----------|-----------|-----------|
| C | -0.000006 | -1.025977 | -0.000030 | H | 3.345463  | -2.426462 | -1.280991 |
| H | -0.000002 | 0.076281  | 0.000028  | H | 1.676215  | 0.642457  | 1.253128  |
| N | -1.150401 | -1.665612 | 0.154796  | H | -3.345478 | -2.426567 | 1.280797  |
| N | 1.150385  | -1.665605 | -0.154923 | H | -1.676219 | 0.642600  | -1.253015 |
| C | -2.321735 | -0.965894 | 0.068740  | H | 3.854751  | 1.784939  | 1.300468  |
| C | -3.465618 | -1.501300 | 0.727569  | H | -3.854744 | 1.785109  | -1.300219 |
| C | -2.501978 | 0.236519  | -0.680226 | H | 5.547377  | -1.275278 | -1.206436 |
| C | -4.689462 | -0.865995 | 0.688224  | H | -5.547381 | -1.275353 | 1.206382  |
| C | -3.725921 | 0.876395  | -0.725599 | N | 6.087913  | 0.998051  | 0.082375  |
| C | -4.823131 | 0.333673  | -0.035761 | O | 6.190412  | 2.058310  | 0.731770  |
| C | 2.321724  | -0.965906 | -0.068787 | O | 7.053556  | 0.500037  | -0.530409 |
| C | 2.501974  | 0.236427  | 0.680304  | N | -6.087903 | 0.998120  | -0.082187 |
| C | 3.465608  | -1.501254 | -0.727665 | O | -6.190397 | 2.058443  | -0.731478 |
| C | 3.725923  | 0.876287  | 0.725753  | O | -7.053545 | 0.500058  | 0.530561  |
| C | 4.689458  | -0.865966 | -0.688243 |   |           |           |           |
| C | 4.823133  | 0.333625  | 0.035868  |   |           |           |           |

Stationary point geometry for singlet excited state ( $S_1$ ) of  $2d^-$

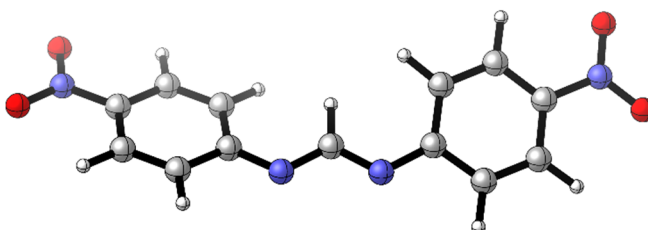

$E_{298}(\text{B3LYP}) = -1020.81310026$  Hartree

$E_{298}(\text{TD-B3LYP}) = -1020.72963015$  Hartree

$G_{298}(\text{B3LYP}) = -1020.87681726$  Hartree

$G_{298}(\text{TD-B3LYP}) = -1020.79334715$  Hartree

-1 1

|   |           |           |           |   |           |           |           |
|---|-----------|-----------|-----------|---|-----------|-----------|-----------|
| C | 0.000003  | -0.865657 | 0.000015  | H | -1.715097 | 1.079462  | -0.722313 |
| H | 0.000008  | 0.229940  | -0.000014 | H | 3.349376  | -2.666885 | -0.678548 |
| N | 1.145177  | -1.539045 | -0.054856 | H | 1.715114  | 1.079433  | 0.722410  |
| N | -1.145182 | -1.539037 | 0.054921  | H | -3.965973 | 2.062887  | -0.706064 |
| C | 2.349743  | -0.877174 | -0.018525 | H | 3.965988  | 2.062869  | 0.706111  |
| C | 3.496876  | -1.632780 | -0.386320 | H | -5.630175 | -1.654605 | 0.683342  |
| C | 2.549820  | 0.477016  | 0.384649  | H | 5.630159  | -1.654591 | -0.683413 |
| C | 4.763326  | -1.075968 | -0.392705 | N | -6.227587 | 0.854803  | 0.002896  |
| C | 3.814204  | 1.038583  | 0.390998  | O | -6.351246 | 2.060013  | -0.340309 |
| C | 4.923411  | 0.268257  | -0.006151 | O | -7.210421 | 0.145618  | 0.343013  |
| C | -2.349740 | -0.877167 | 0.018562  | N | 6.227585  | 0.854806  | -0.002943 |
| C | -2.549811 | 0.477033  | -0.384592 | O | 6.351251  | 2.060014  | 0.340282  |
| C | -3.496885 | -1.632782 | 0.386313  | O | 7.210413  | 0.145628  | -0.343100 |
| C | -3.814195 | 1.038595  | -0.390967 |   |           |           |           |
| C | -4.763335 | -1.075975 | 0.392668  |   |           |           |           |
| C | -4.923411 | 0.268257  | 0.006133  |   |           |           |           |
| H | -3.349390 | -2.666892 | 0.678529  |   |           |           |           |

Local minimum for singlet excited state ( $S_1$ ) of  $2d^-$

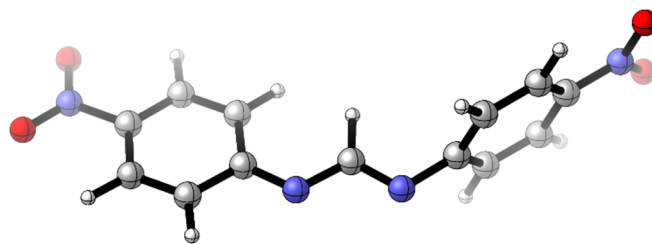

$E_{298}(\text{B3LYP}) = -1020.79940902$  Hartree

$E_{298}(\text{TD-B3LYP}) = -1020.74396349$  Hartree

$G_{298}(\text{B3LYP}) = -1020.85677502$  Hartree

$G_{298}(\text{TD-B3LYP}) = -1020.80132949$  Hartree

-1 1

|   |           |           |           |   |           |           |           |
|---|-----------|-----------|-----------|---|-----------|-----------|-----------|
| C | 0.053053  | -0.127528 | -0.906171 | H | -3.413915 | 0.065715  | -2.656634 |
| H | 0.127514  | 0.014926  | 0.178277  | H | 2.396947  | -2.385637 | -0.594091 |
| N | 1.117385  | -0.272461 | -1.622420 | H | 2.604746  | 1.877461  | -1.060762 |
| N | -1.165300 | -0.131654 | -1.529309 | H | -5.655399 | 0.179252  | -1.552552 |
| C | 2.350056  | -0.253867 | -0.891257 | H | 4.777865  | 1.903215  | 0.154836  |
| C | 2.915093  | -1.446733 | -0.424161 | H | -3.760315 | -0.146709 | 2.299113  |
| C | 3.031644  | 0.952049  | -0.686241 | H | 4.572296  | -2.357862 | 0.617989  |
| C | 4.134130  | -1.438368 | 0.252527  | N | -6.113056 | 0.092629  | 1.075226  |
| C | 4.250353  | 0.972795  | -0.009367 | O | -7.116972 | 0.190381  | 0.359634  |
| C | 4.812650  | -0.224967 | 0.468571  | O | -6.153100 | 0.045902  | 2.310431  |
| C | -2.305158 | -0.085563 | -0.810788 | N | 6.044961  | -0.209365 | 1.152680  |
| C | -3.509612 | 0.025076  | -1.578240 | O | 6.643756  | 0.922832  | 1.347828  |
| C | -2.423888 | -0.151525 | 0.618790  | O | 6.551591  | -1.327341 | 1.567316  |
| C | -4.746447 | 0.088406  | -0.973272 |   |           |           |           |
| C | -3.661858 | -0.093974 | 1.222964  |   |           |           |           |
| C | -4.811312 | 0.029717  | 0.426429  |   |           |           |           |
| H | -1.547703 | -0.262151 | 1.242678  |   |           |           |           |

Singlet ground state ( $S_0$ ) of  $2e^-$

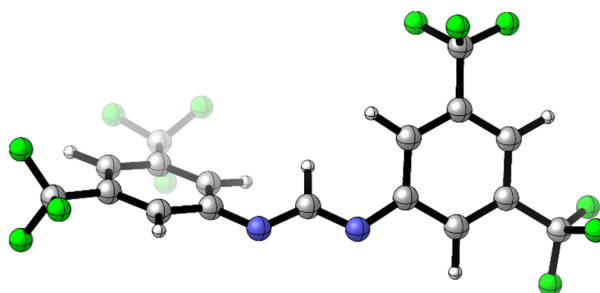

$E_{298}(\text{B3LYP}) = -1960.27638370$  Hartree

$E_{298}(\text{TD-B3LYP}) = -1960.15629633$  Hartree

$G_{298}(\text{B3LYP}) = -1960.37011370$  Hartree

$G_{298}(\text{TD-B3LYP}) = -1960.25002633$  Hartree

-1 1

|   |           |           |           |   |           |           |           |
|---|-----------|-----------|-----------|---|-----------|-----------|-----------|
| C | 0.000119  | 1.245267  | -0.000591 | C | -3.795014 | -1.900433 | 1.729837  |
| H | 0.000005  | 0.139422  | 0.000056  | C | -5.893286 | 1.456765  | -1.320437 |
| N | -1.157842 | 1.874506  | -0.129992 | C | 5.893609  | 1.457251  | 1.318821  |
| N | 1.158209  | 1.874421  | 0.128074  | C | 3.794479  | -1.903354 | -1.727189 |
| C | -2.318336 | 1.142381  | -0.014445 | F | -6.596573 | 0.473039  | -1.947609 |
| C | -3.472350 | 1.608505  | -0.694169 | F | -5.601240 | 2.387181  | -2.261249 |
| C | -2.468201 | -0.021189 | 0.779210  | F | -6.772500 | 2.047687  | -0.456967 |
| C | -4.679496 | 0.926914  | -0.613697 | F | -4.920960 | -2.625149 | 1.511571  |
| C | -3.690820 | -0.693940 | 0.841389  | F | -3.806262 | -1.564515 | 3.053644  |
| C | -4.813605 | -0.240612 | 0.151484  | F | -2.745744 | -2.753300 | 1.572888  |
| C | 2.318552  | 1.141924  | 0.013369  | F | 2.745774  | -2.756506 | -1.567890 |
| C | 2.468174  | -0.022624 | -0.778894 | F | 4.920994  | -2.627245 | -1.509169 |
| C | 3.472679  | 1.608637  | 0.692499  | F | 3.804073  | -1.569261 | -3.051463 |
| C | 3.690664  | -0.695688 | -0.840294 | F | 6.772579  | 2.047501  | 0.454639  |
| C | 4.679690  | 0.926715  | 0.612818  | F | 5.601713  | 2.388463  | 2.258897  |
| C | 4.813552  | -0.241761 | -0.150958 | F | 6.597110  | 0.474121  | 1.946674  |
| H | 3.384017  | 2.508877  | 1.288966  | H | 5.757464  | -0.767591 | -0.209092 |
| H | 1.632291  | -0.384119 | -1.366411 | H | -5.757624 | -0.766188 | 0.210226  |
| H | -3.383496 | 2.508007  | -1.291720 |   |           |           |           |
| H | -1.632396 | -0.382149 | 1.367162  |   |           |           |           |

Singlet ground state ( $S_0$ ) of  $2f^-$

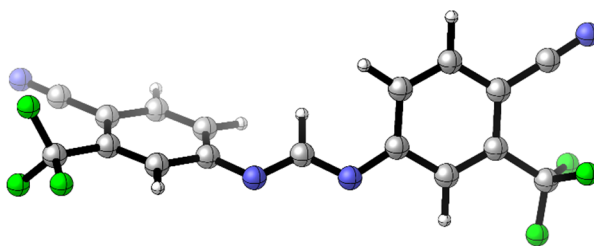

$E_{298}(\text{B3LYP}) = -1470.51814305$  Hartree

$E_{298}(\text{TD-B3LYP}) = -1470.41076136$  Hartree

$G_{298}(\text{B3LYP}) = -1470.59770905$  Hartree

$G_{298}(\text{TD-B3LYP}) = -1470.49032736$  Hartree

-1 1

|   |           |           |           |   |           |           |           |
|---|-----------|-----------|-----------|---|-----------|-----------|-----------|
| C | -0.000028 | -0.424459 | -0.000093 | H | -3.487862 | -1.768084 | 0.842052  |
| H | -0.000041 | 0.679369  | -0.000060 | H | -1.484671 | 1.220927  | -1.522778 |
| N | -1.162250 | -1.059950 | -0.003945 | C | -5.995299 | -0.790472 | 0.624891  |
| N | 1.162209  | -1.059923 | 0.003722  | C | 5.995252  | -0.790330 | -0.625092 |
| C | -2.304131 | -0.348931 | -0.260439 | C | -6.000966 | 1.675175  | -0.981550 |
| C | -3.526897 | -0.857798 | 0.256936  | C | 6.000877  | 1.675233  | 0.981477  |
| C | -2.378467 | 0.829746  | -1.050628 | N | -6.976701 | 2.272730  | -1.209064 |
| C | -4.732145 | -0.217030 | 0.041544  | N | 6.976602  | 2.272792  | 1.209024  |
| C | -3.586484 | 1.473962  | -1.265261 | F | -6.612694 | 0.084513  | 1.466653  |
| C | -4.787104 | 0.976099  | -0.724865 | F | -5.782331 | -1.923093 | 1.333626  |
| C | 2.304075  | -0.348896 | 0.260255  | F | -6.908661 | -1.099652 | -0.336836 |
| C | 2.378391  | 0.829742  | 1.050506  | F | 6.908618  | -1.099545 | 0.336621  |
| C | 3.526851  | -0.857715 | -0.257145 | F | 5.782303  | -1.922919 | -1.333885 |
| C | 3.586397  | 1.473967  | 1.265174  | F | 6.612635  | 0.084708  | -1.466807 |
| C | 4.732088  | -0.216938 | -0.041718 | H | 3.618978  | 2.371856  | 1.873328  |
| C | 4.787026  | 0.976152  | 0.724755  | H | -3.619081 | 2.371883  | -1.873367 |
| H | 3.487832  | -1.767971 | -0.842309 |   |           |           |           |
| H | 1.484587  | 1.220883  | 1.522674  |   |           |           |           |

Singlet Excited state ( $S_1$ ) of  $2f^-$

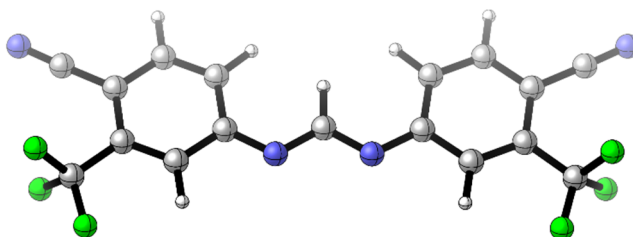

$E_{298}(\text{B3LYP}) = -1470.51468198$  Hartree

$E_{298}(\text{TD-B3LYP}) = -1470.41842354$  Hartree

$G_{298}(\text{B3LYP}) = -1470.59113798$  Hartree

$G_{298}(\text{TD-B3LYP}) = -1470.49487954$  Hartree

-1 1

|   |           |           |           |   |           |           |           |
|---|-----------|-----------|-----------|---|-----------|-----------|-----------|
| C | 0.000000  | -0.037099 | -0.000005 | H | -1.726188 | 2.026675  | -0.109498 |
| H | 0.000000  | 1.055220  | -0.000001 | C | -5.960284 | -1.324519 | -0.194677 |
| N | -1.145986 | -0.724249 | -0.045485 | C | 5.960285  | -1.324515 | 0.194679  |
| N | 1.145987  | -0.724249 | 0.045473  | C | -6.263332 | 1.614976  | -0.256610 |
| C | -2.350013 | -0.084599 | -0.095834 | C | 6.263330  | 1.614980  | 0.256618  |
| C | -3.500619 | -0.917808 | -0.122028 | N | -7.309333 | 2.139975  | -0.303372 |
| C | -2.561850 | 1.338764  | -0.124784 | N | 7.309329  | 2.139982  | 0.303385  |
| C | -4.782309 | -0.402734 | -0.171634 | F | -6.804156 | -1.117142 | 0.859638  |
| C | -3.839191 | 1.855385  | -0.176850 | F | -5.610131 | -2.632335 | -0.154822 |
| C | -4.981440 | 1.017635  | -0.201676 | F | -6.726222 | -1.162694 | -1.314477 |
| C | 2.350013  | -0.084598 | 0.095826  | F | 6.726218  | -1.162691 | 1.314482  |
| C | 2.561848  | 1.338766  | 0.124778  | F | 5.610132  | -2.632332 | 0.154821  |
| C | 3.500620  | -0.917806 | 0.122022  | F | 6.804160  | -1.117137 | -0.859632 |
| C | 3.839189  | 1.855387  | 0.176850  | H | 3.985754  | 2.930247  | 0.200150  |
| C | 4.782309  | -0.402731 | 0.171633  | H | -3.985757 | 2.930245  | -0.200147 |
| C | 4.981439  | 1.017638  | 0.201679  |   |           |           |           |
| H | 3.342544  | -1.989125 | 0.099982  |   |           |           |           |
| H | 1.726186  | 2.026676  | 0.109491  |   |           |           |           |
| H | -3.341543 | -1.989127 | -0.099990 |   |           |           |           |

Singlet ground state ( $S_0$ ) of  $2g^-$

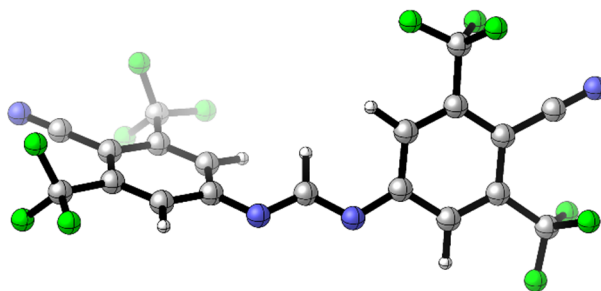

$E_{298}(\text{B3LYP}) = -2144.81847078$  Hartree

$E_{298}(\text{TD-B3LYP}) = -2144.71389236$  Hartree

$G_{298}(\text{B3LYP}) = -2144.91645578$  Hartree

$G_{298}(\text{TD-B3LYP}) = -2144.81187736$  Hartree

-1 1

|   |           |           |           |   |           |           |           |
|---|-----------|-----------|-----------|---|-----------|-----------|-----------|
| C | 0.000022  | -1.159376 | 0.000040  | C | 5.946486  | -1.606689 | -0.964767 |
| H | 0.000015  | -0.056160 | 0.000016  | C | -5.946436 | -1.606713 | 0.964870  |
| N | 1.157364  | -1.799430 | -0.070312 | C | -3.746897 | 1.994336  | -1.825237 |
| N | -1.157312 | -1.799441 | 0.070420  | C | 6.099776  | 0.864254  | 0.556290  |
| C | 2.317820  | -1.101613 | 0.105793  | C | -6.099754 | 0.864162  | -0.556295 |
| C | 3.503906  | -1.633206 | -0.462075 | N | 7.127765  | 1.400263  | 0.671702  |
| C | 2.447211  | 0.091199  | 0.867828  | N | -7.127748 | 1.400157  | -0.671731 |
| C | 4.723316  | -0.999435 | -0.322247 | F | 6.518153  | -0.764119 | -1.865648 |
| C | 3.669239  | 0.727953  | 1.005632  | F | 5.671320  | -2.753445 | -1.625501 |
| C | 4.842994  | 0.208158  | 0.411587  | F | 6.906653  | -1.903639 | -0.049451 |
| C | -2.317777 | -1.101645 | -0.105714 | F | 4.187985  | 3.047713  | 1.088164  |
| C | -2.447181 | 0.091133  | -0.867802 | F | 4.600248  | 1.871036  | 2.875322  |
| C | -3.503856 | -1.633225 | 0.462177  | F | 2.548732  | 2.354673  | 2.338786  |
| C | -3.669217 | 0.727867  | -1.005634 | F | -2.548730 | 2.354537  | -2.338864 |
| C | -4.723274 | -0.999475 | 0.322323  | F | -4.187982 | 3.047620  | -1.088264 |
| C | -4.842966 | 0.208085  | -0.411565 | F | -4.600245 | 1.870861  | -2.875369 |
| H | -3.427517 | -2.555003 | 1.024429  | F | -6.906603 | -1.903712 | 0.049569  |
| H | -1.584955 | 0.499483  | -1.377116 | F | -5.671258 | -2.753439 | 1.625652  |
| H | 3.427577  | -2.555008 | -1.024287 | F | -6.518109 | -0.764111 | 1.865716  |
| H | 1.584979  | 0.499562  | 1.377123  |   |           |           |           |
| C | 3.746905  | 1.994458  | 1.825181  |   |           |           |           |

Singlet excited state ( $S_1$ ) of  $2g^-$

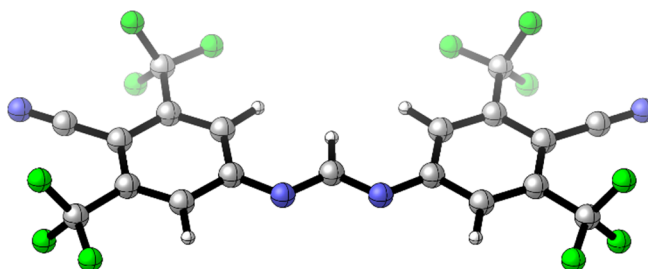

$E_{298}(\text{B3LYP}) = -2144.81515281$  Hartree

$E_{298}(\text{TD-B3LYP}) = -2144.71922541$  Hartree

$G_{298}(\text{B3LYP}) = -2144.91128581$  Hartree

$G_{298}(\text{TD-B3LYP}) = -2144.81535841$  Hartree

-1 1

|   |           |           |           |   |           |           |           |
|---|-----------|-----------|-----------|---|-----------|-----------|-----------|
| C | 0.000000  | 0.873730  | -0.000031 | C | 5.009969  | -0.136340 | -0.004020 |
| H | 0.000000  | -0.219516 | 0.000049  | H | 3.331059  | 2.855079  | -0.003861 |
| N | -1.143600 | 1.563270  | 0.000874  | H | 1.754079  | -1.166745 | 0.000934  |
| N | 1.143599  | 1.563270  | -0.001015 | H | -3.331059 | 2.855079  | 0.003778  |
| C | -2.356101 | 0.940498  | 0.001588  | H | -1.754079 | -1.166745 | -0.001095 |
| C | -3.498756 | 1.785236  | 0.003343  | C | -4.054510 | -2.482686 | 0.001310  |
| C | -2.584297 | -0.475145 | 0.000648  | C | -5.950432 | 2.221704  | 0.006454  |
| C | -4.781876 | 1.279180  | 0.004549  | C | 5.950432  | 2.221705  | -0.006394 |
| C | -3.864497 | -0.986048 | 0.001830  | C | 4.054510  | -2.482686 | -0.001324 |
| C | -5.009969 | -0.136340 | 0.004057  | C | -6.321066 | -0.668640 | 0.005812  |
| C | 2.356101  | 0.940498  | -0.001689 | C | 6.321066  | -0.668640 | -0.005682 |
| C | 2.584297  | -0.475145 | -0.000746 | N | -7.407726 | -1.102390 | 0.007327  |
| C | 3.498756  | 1.785236  | -0.003406 | N | 7.407726  | -1.102390 | -0.007118 |
| C | 3.864498  | -0.986048 | -0.001861 | F | -6.753205 | 2.049064  | -1.081178 |
| C | 4.781876  | 1.279180  | -0.004541 | F | -5.572917 | 3.521288  | 0.006205  |

|   |           |           |           |   |          |           |           |
|---|-----------|-----------|-----------|---|----------|-----------|-----------|
| F | -6.750045 | 2.048566  | 1.096341  | F | 4.743712 | -2.908849 | -1.092891 |
| F | -4.751792 | -2.907283 | -1.085663 | F | 6.750122 | 2.048532  | -1.096219 |
| F | -4.743550 | -2.908852 | 1.092979  | F | 5.572916 | 3.521289  | -0.006213 |
| F | -2.880914 | -3.156993 | -0.003600 | F | 6.753128 | 2.049099  | 1.081300  |
| F | 2.880914  | -3.156993 | 0.003412  |   |          |           |           |
| F | 4.751632  | -2.907285 | 1.085752  |   |          |           |           |

### (K) Copies of NMR Spectra

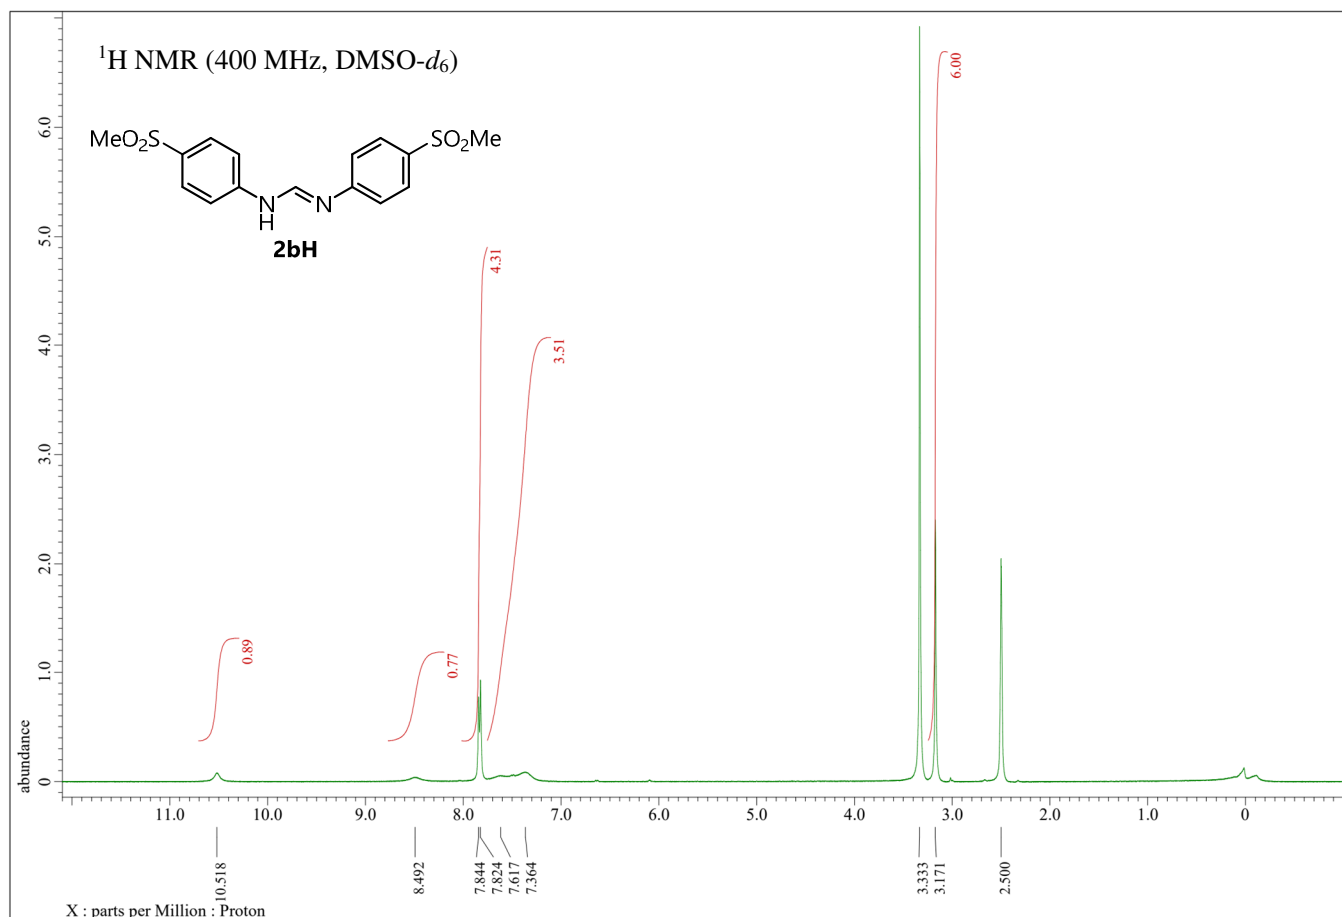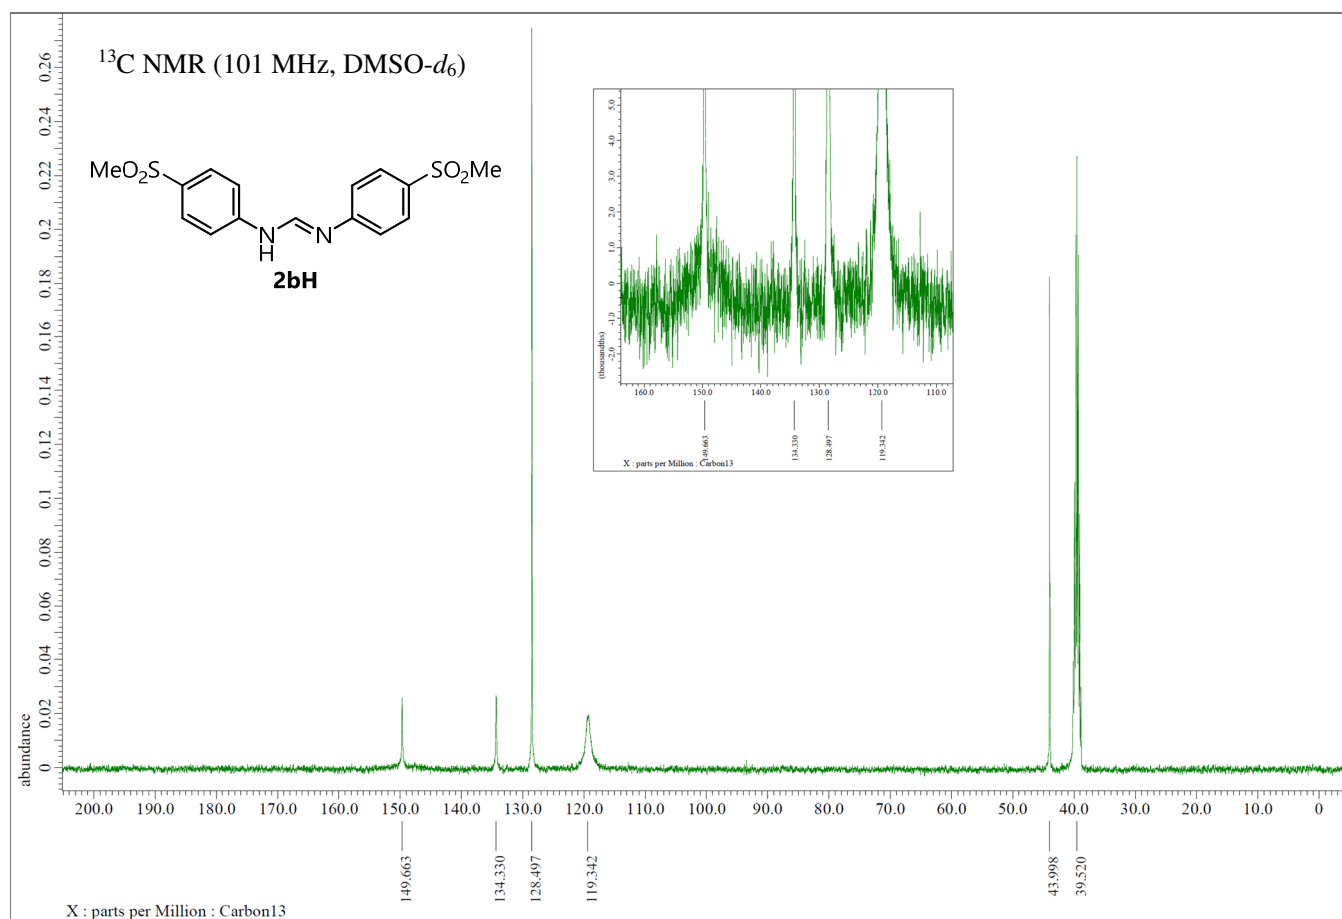

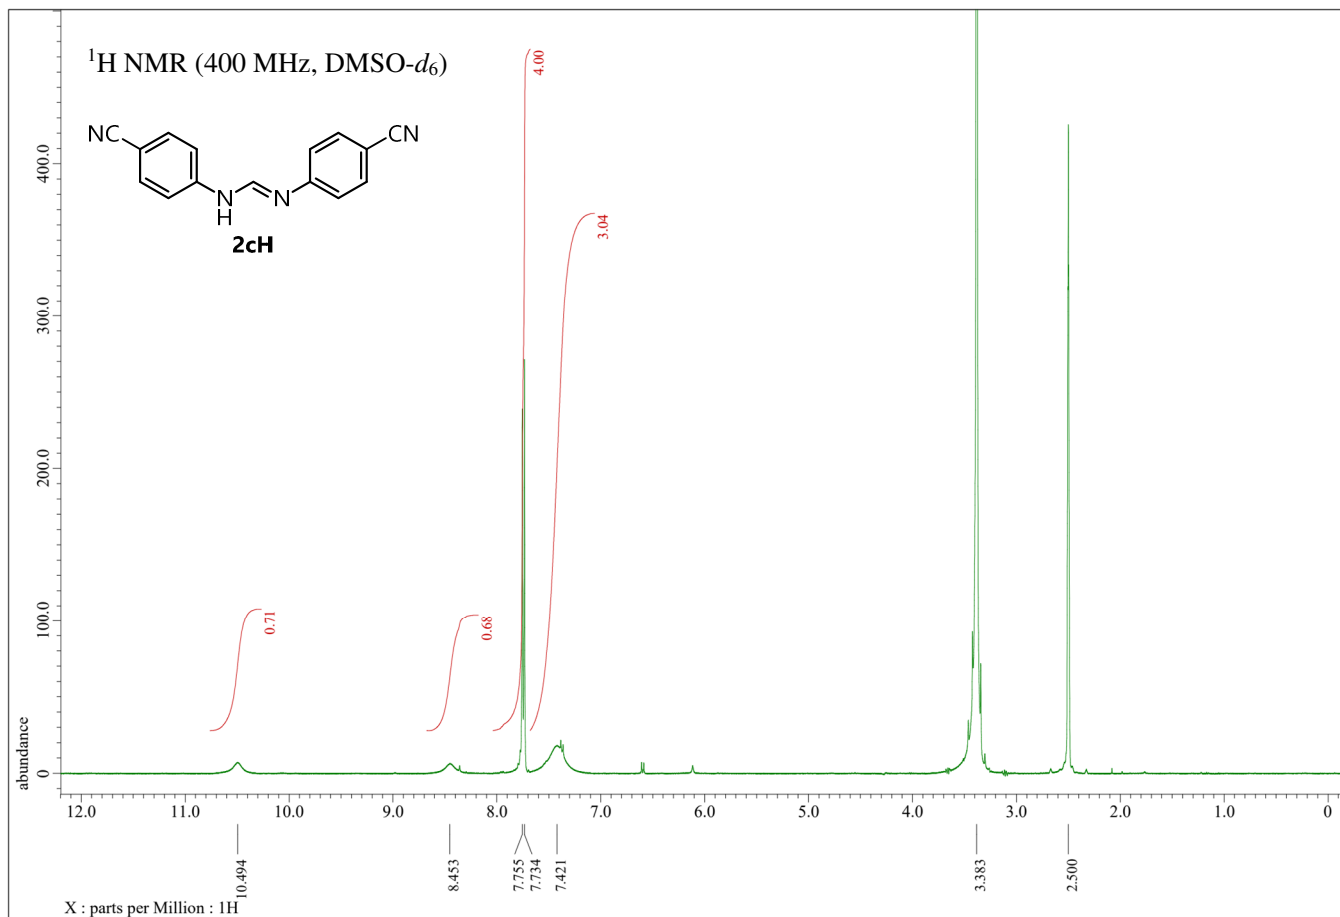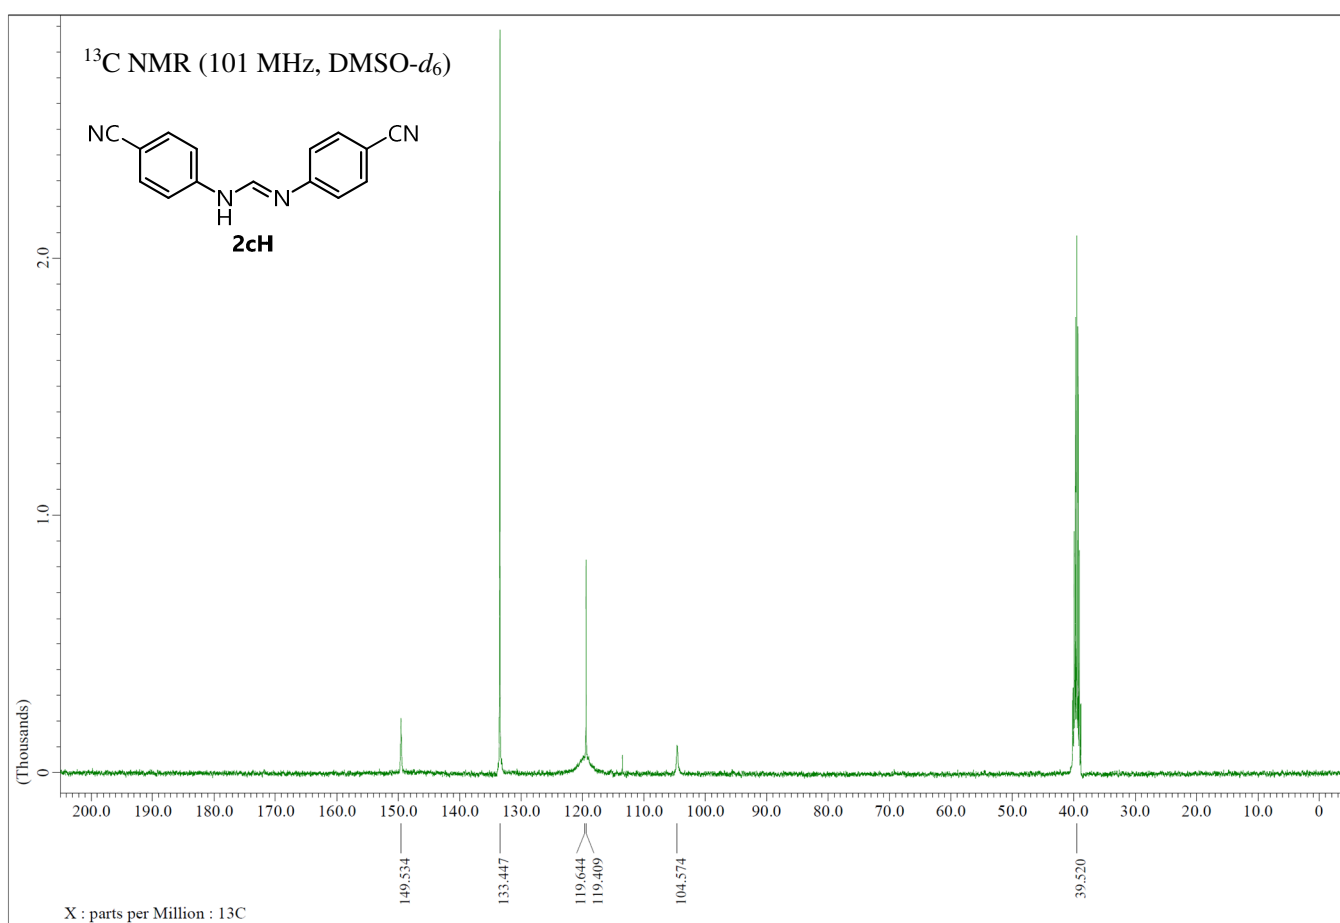

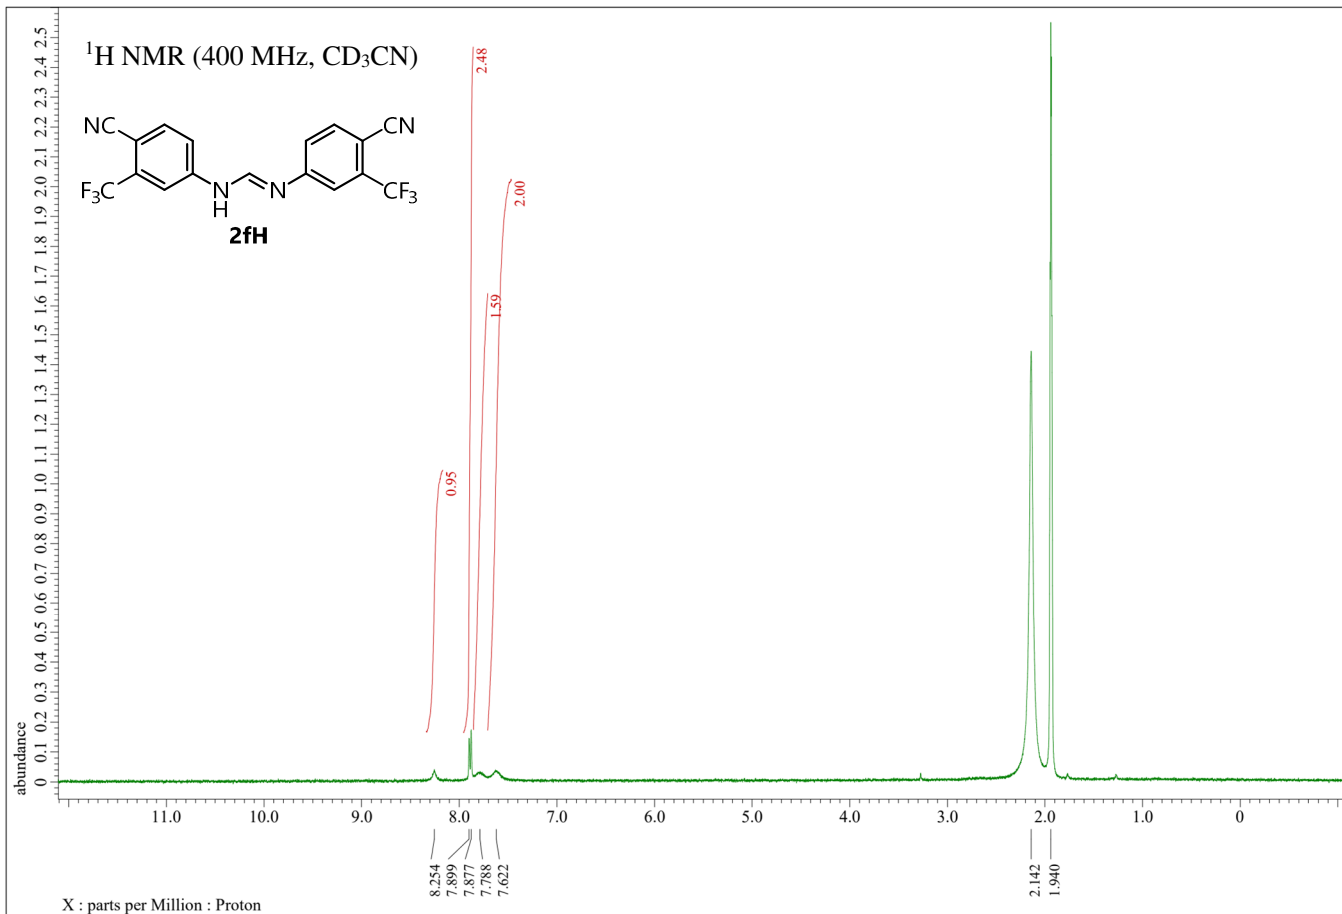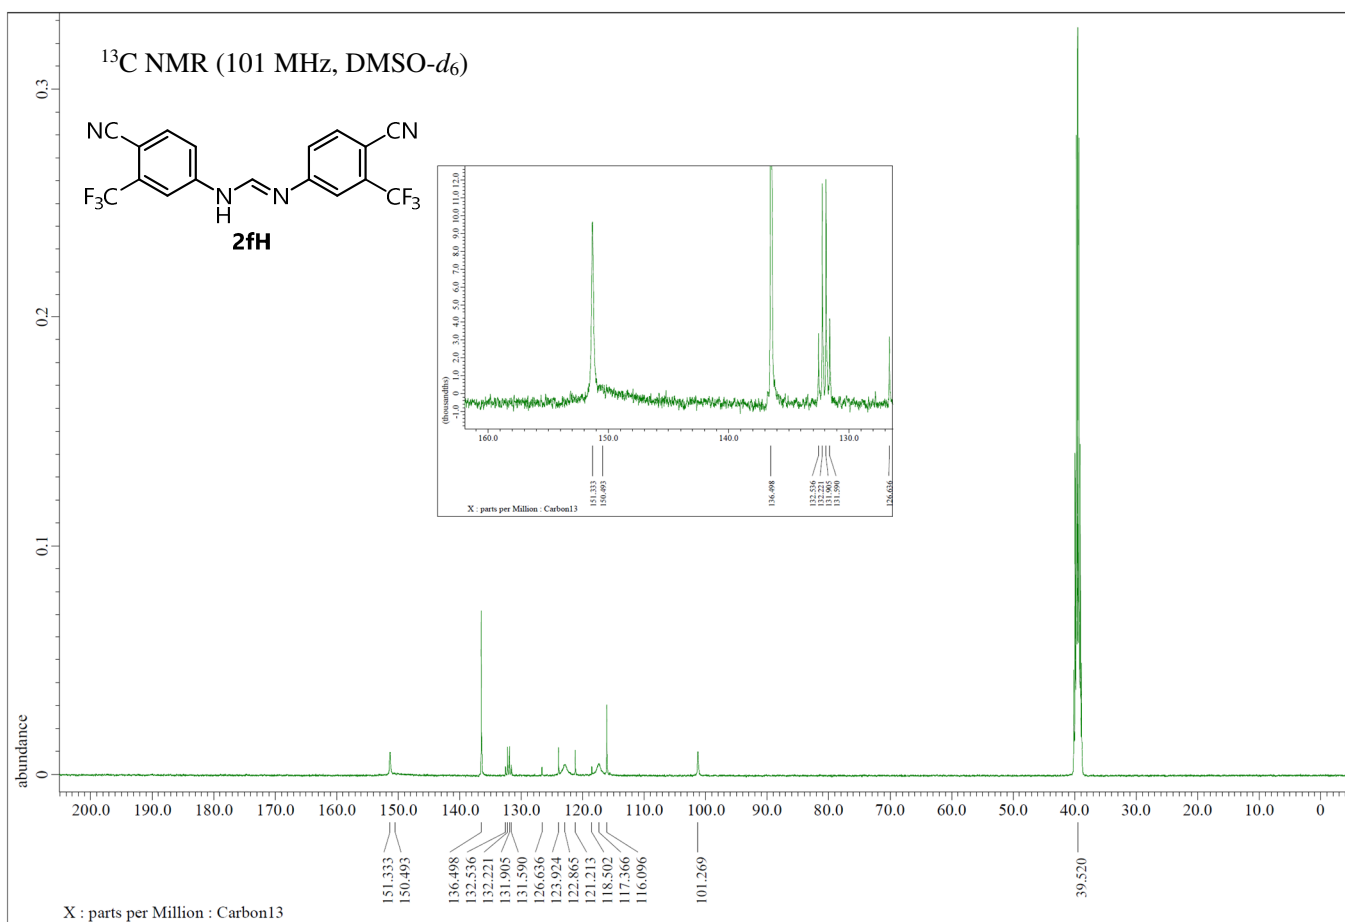



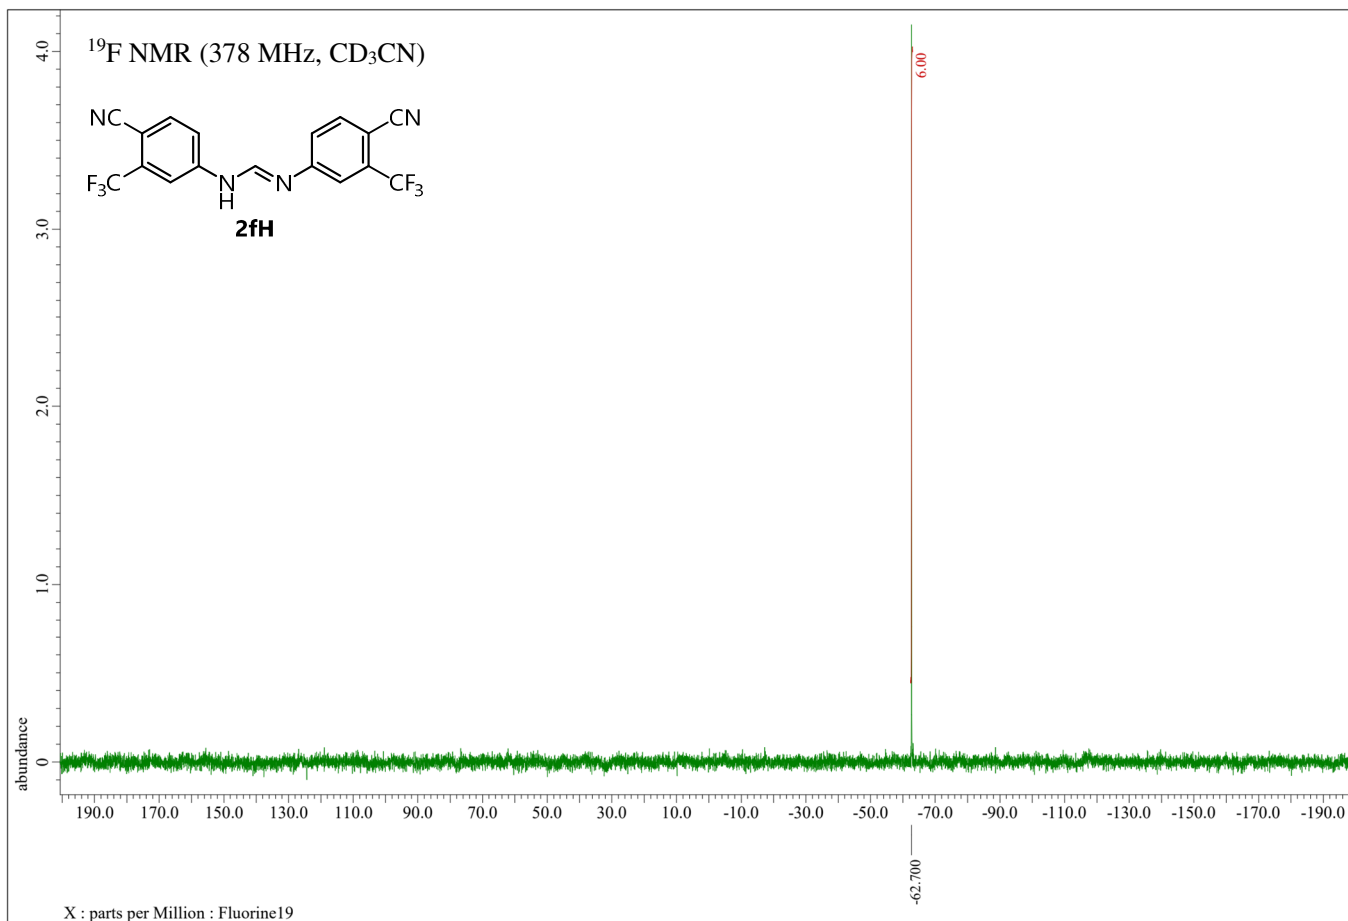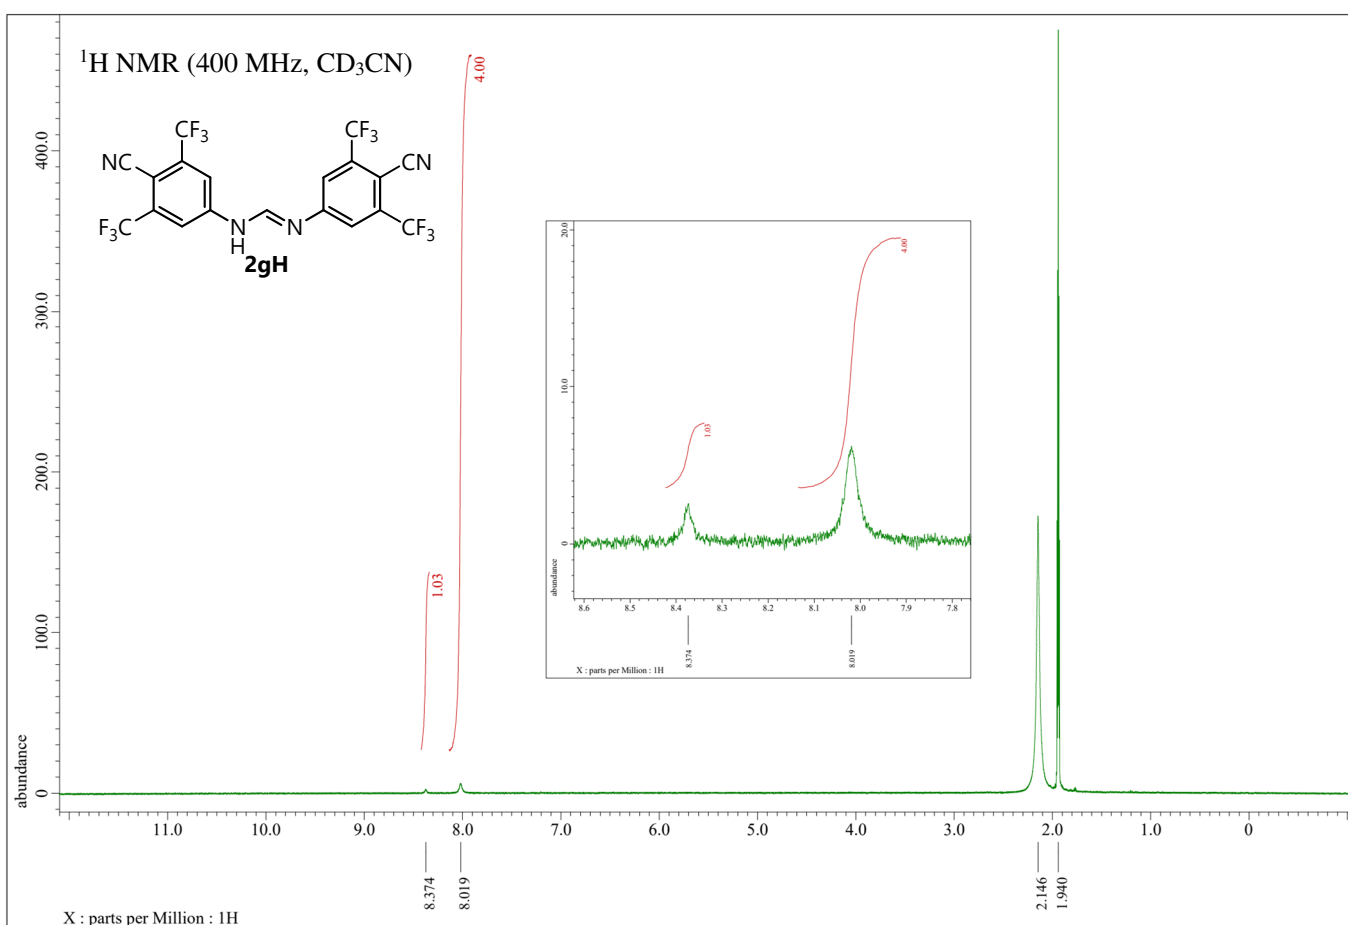

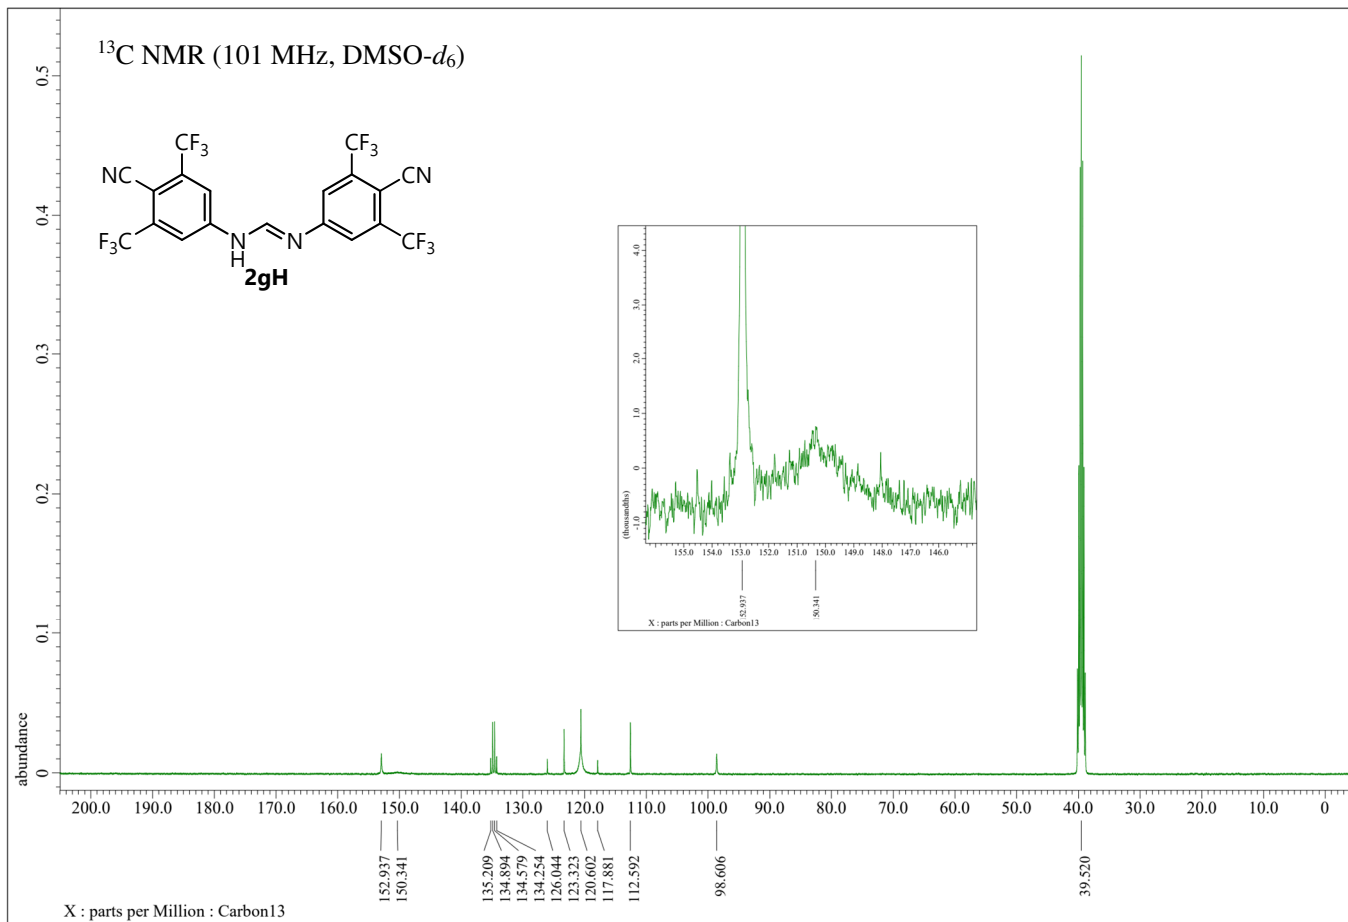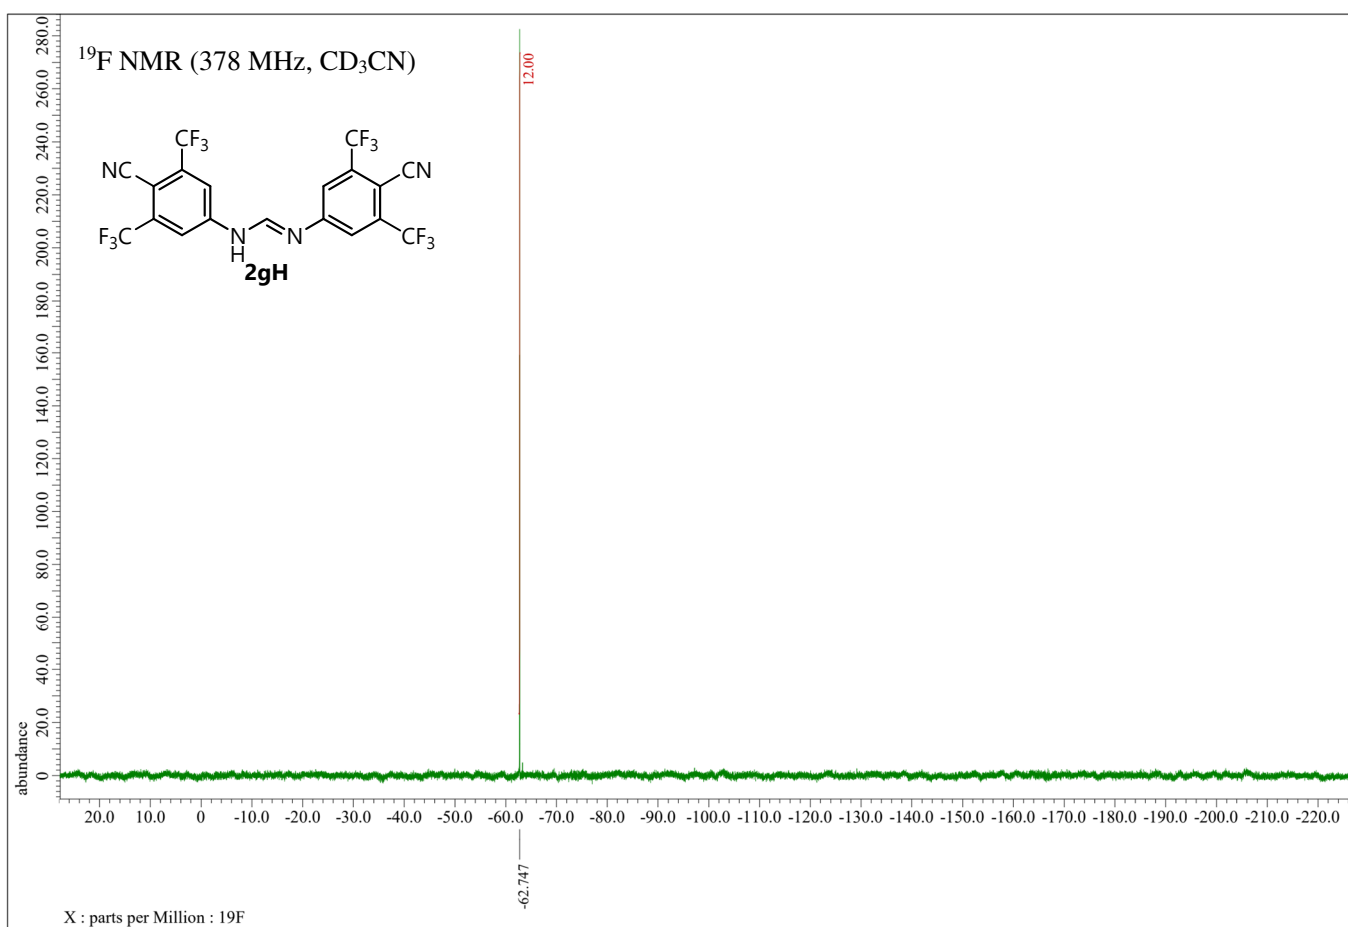

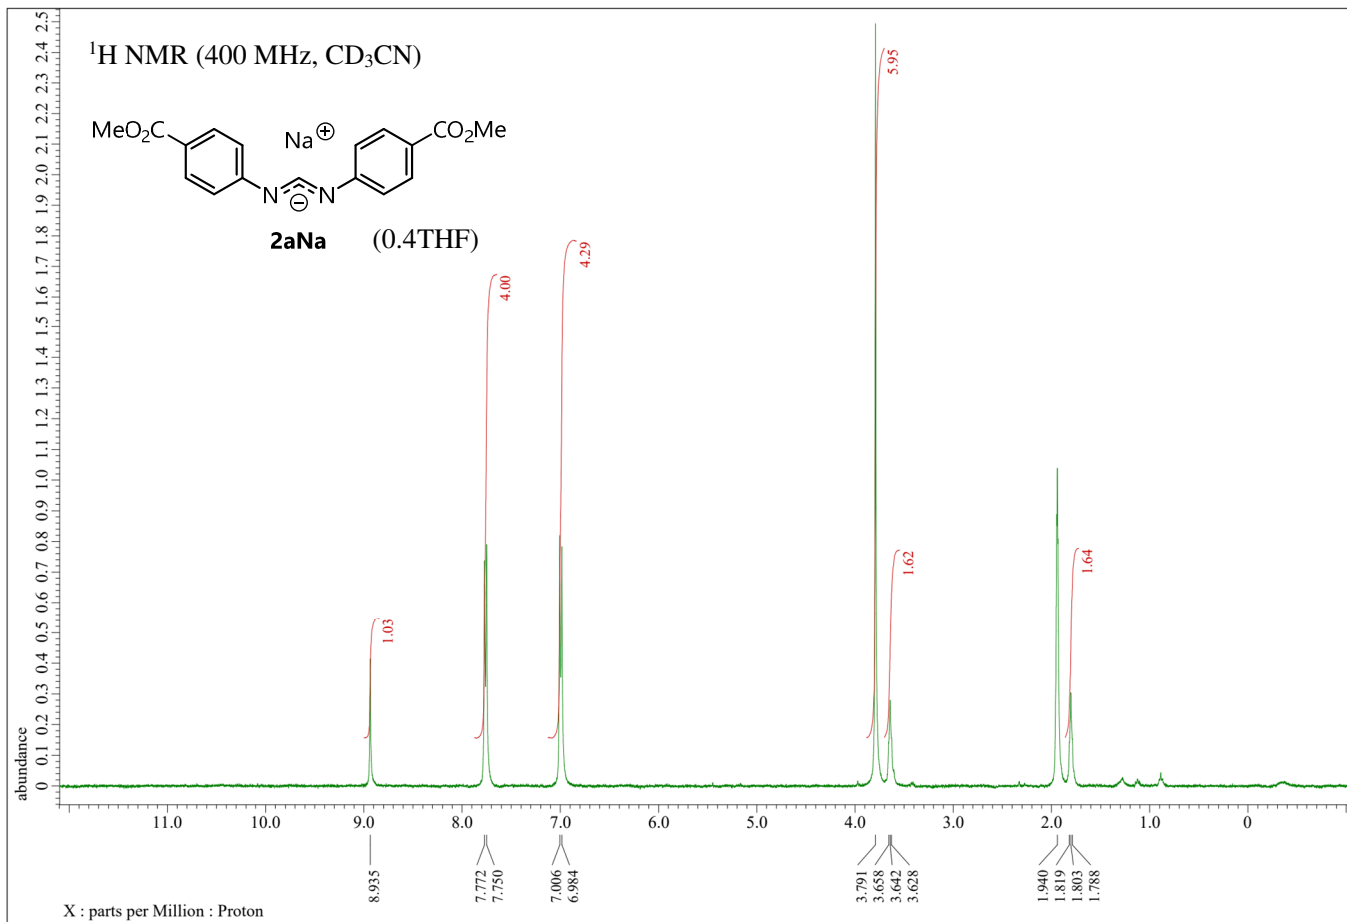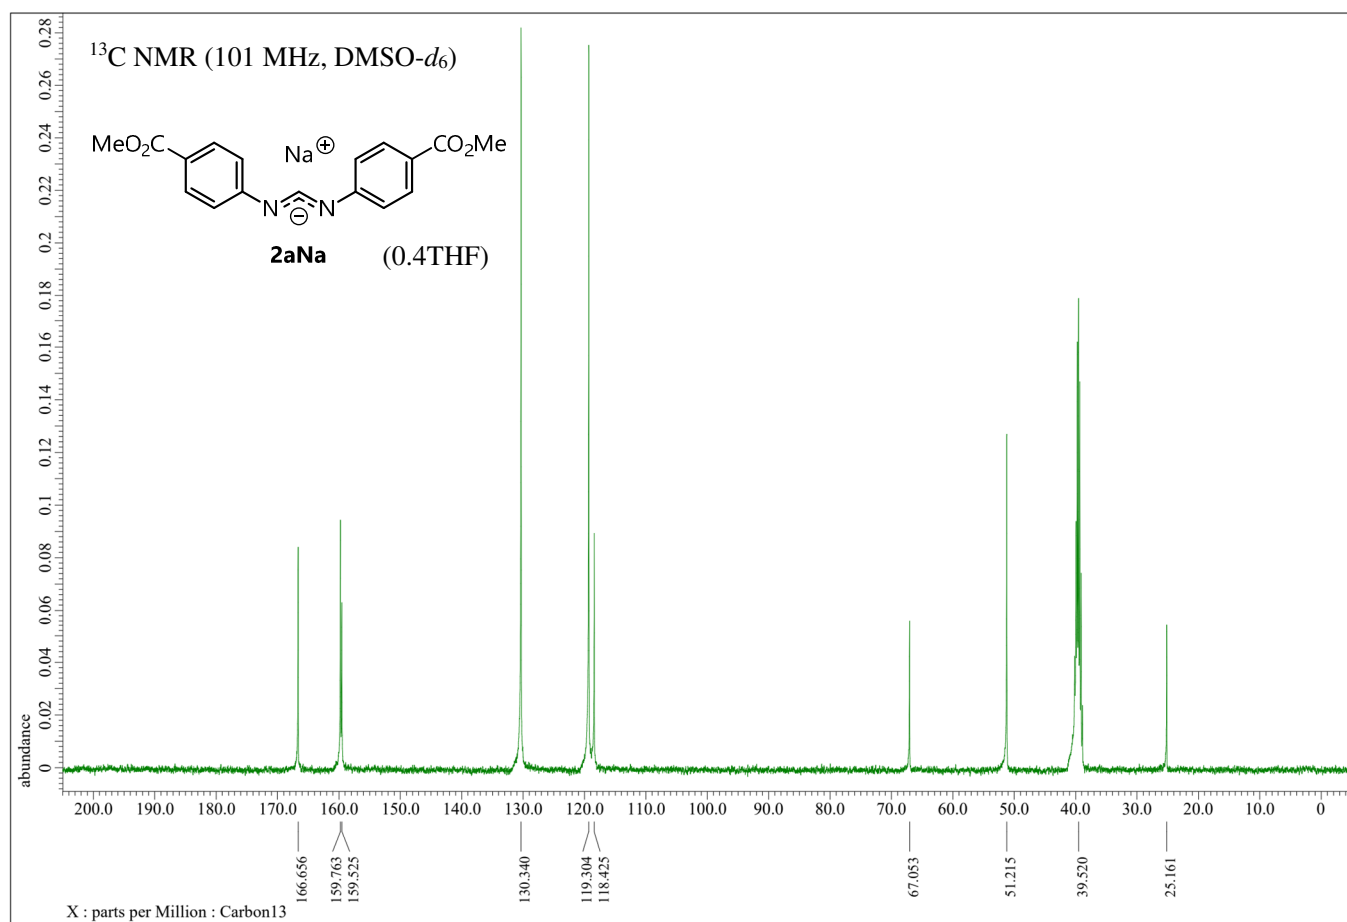

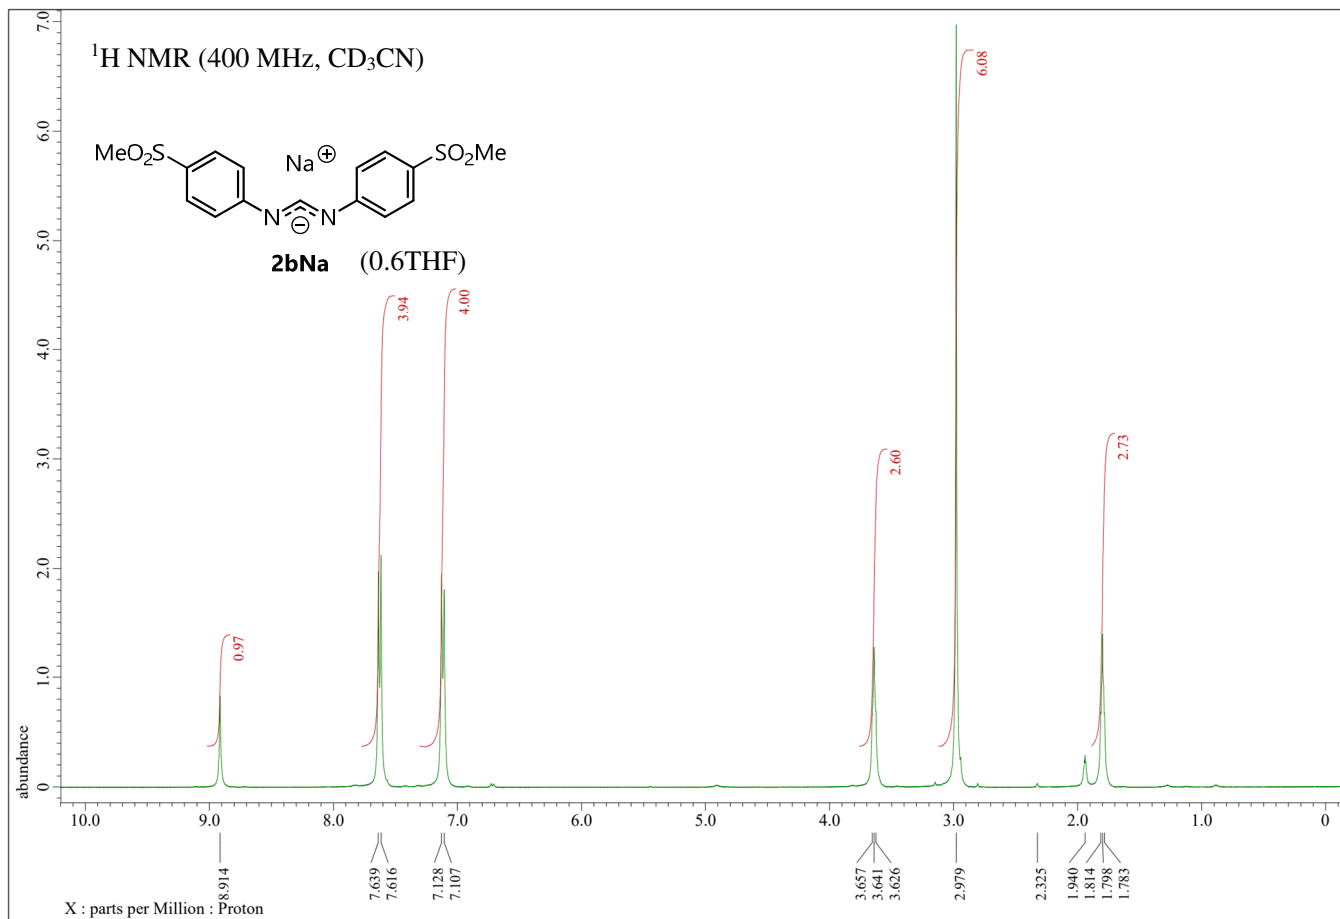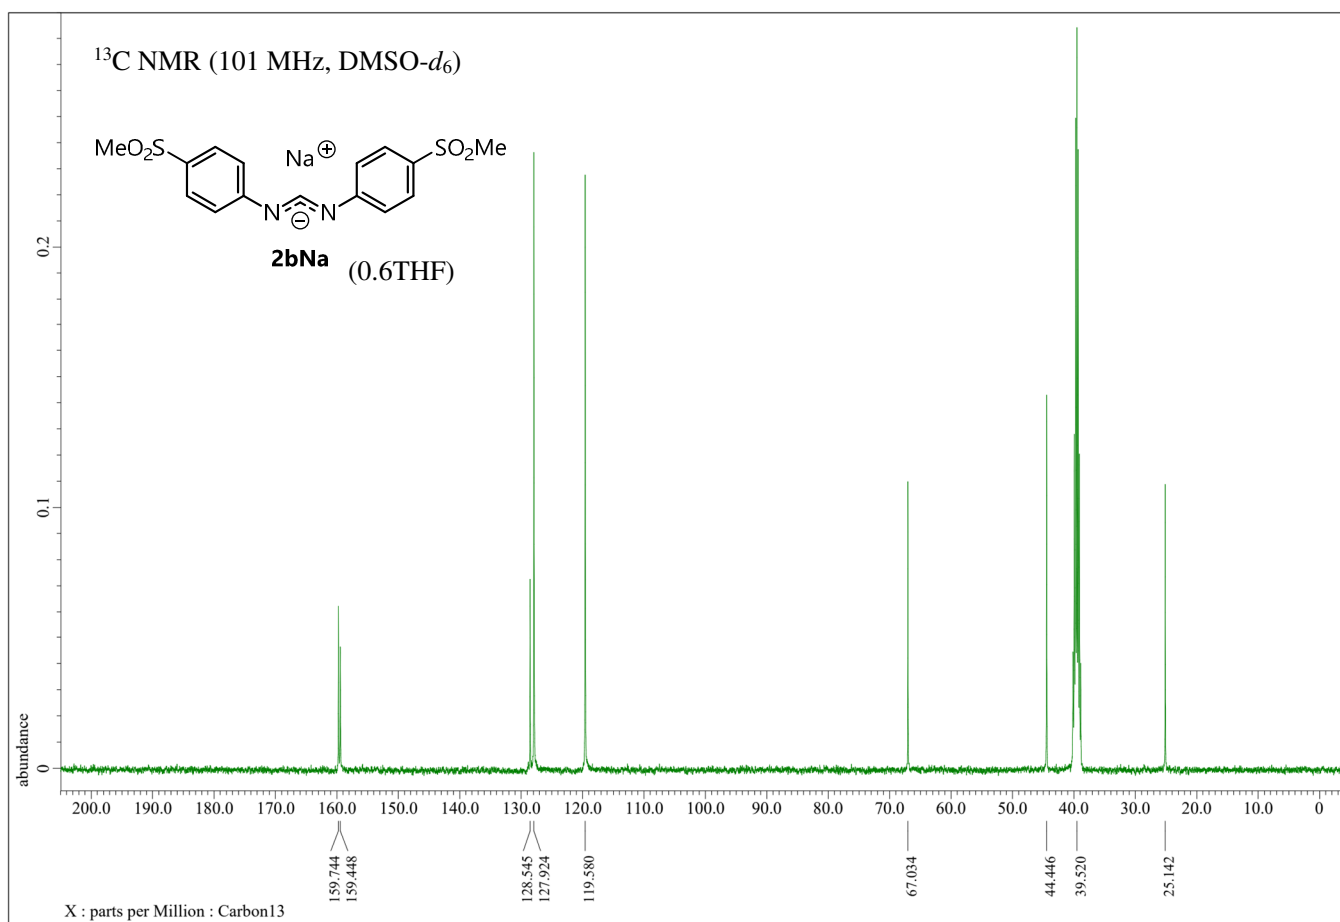

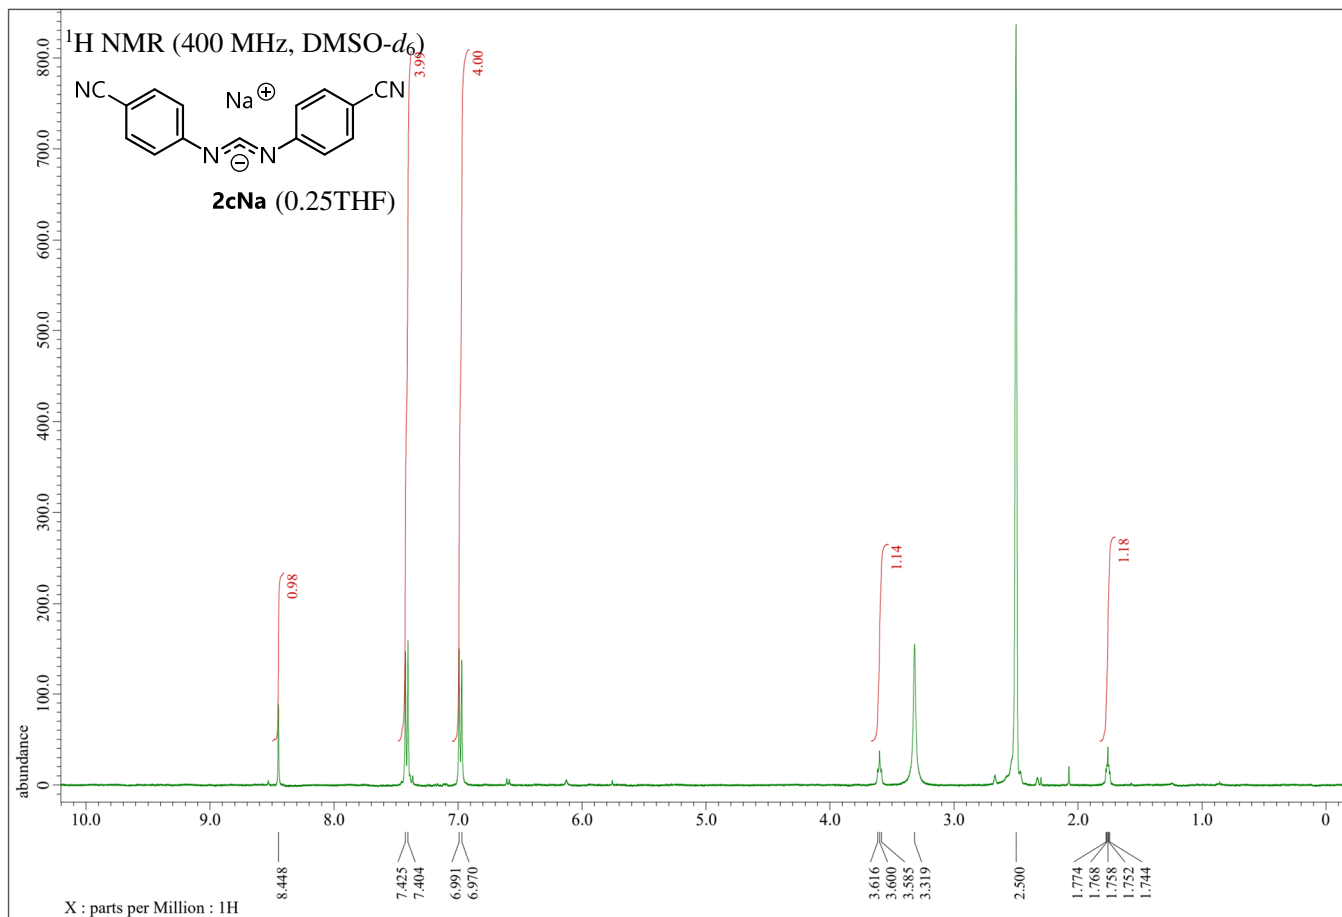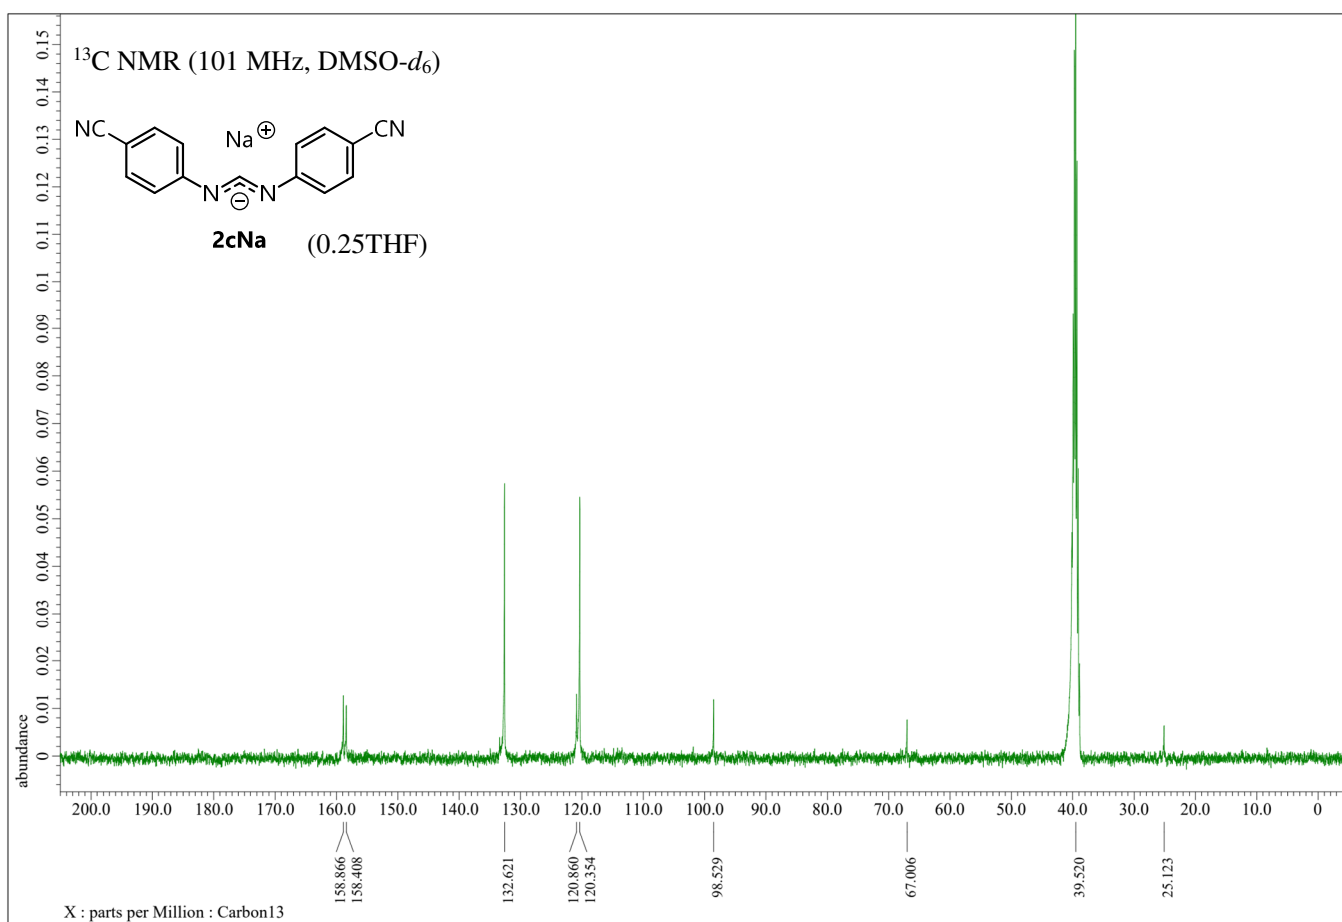

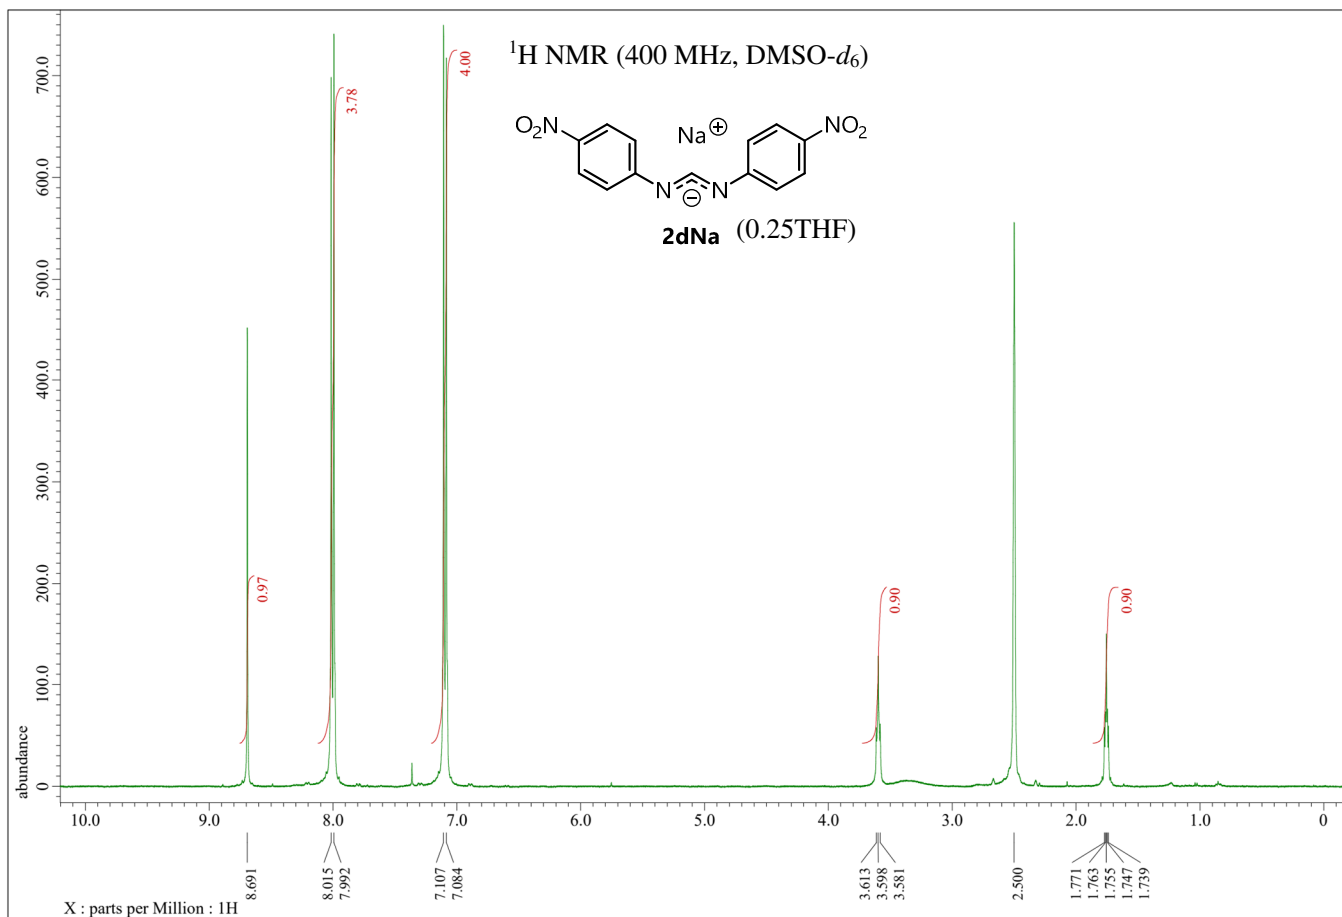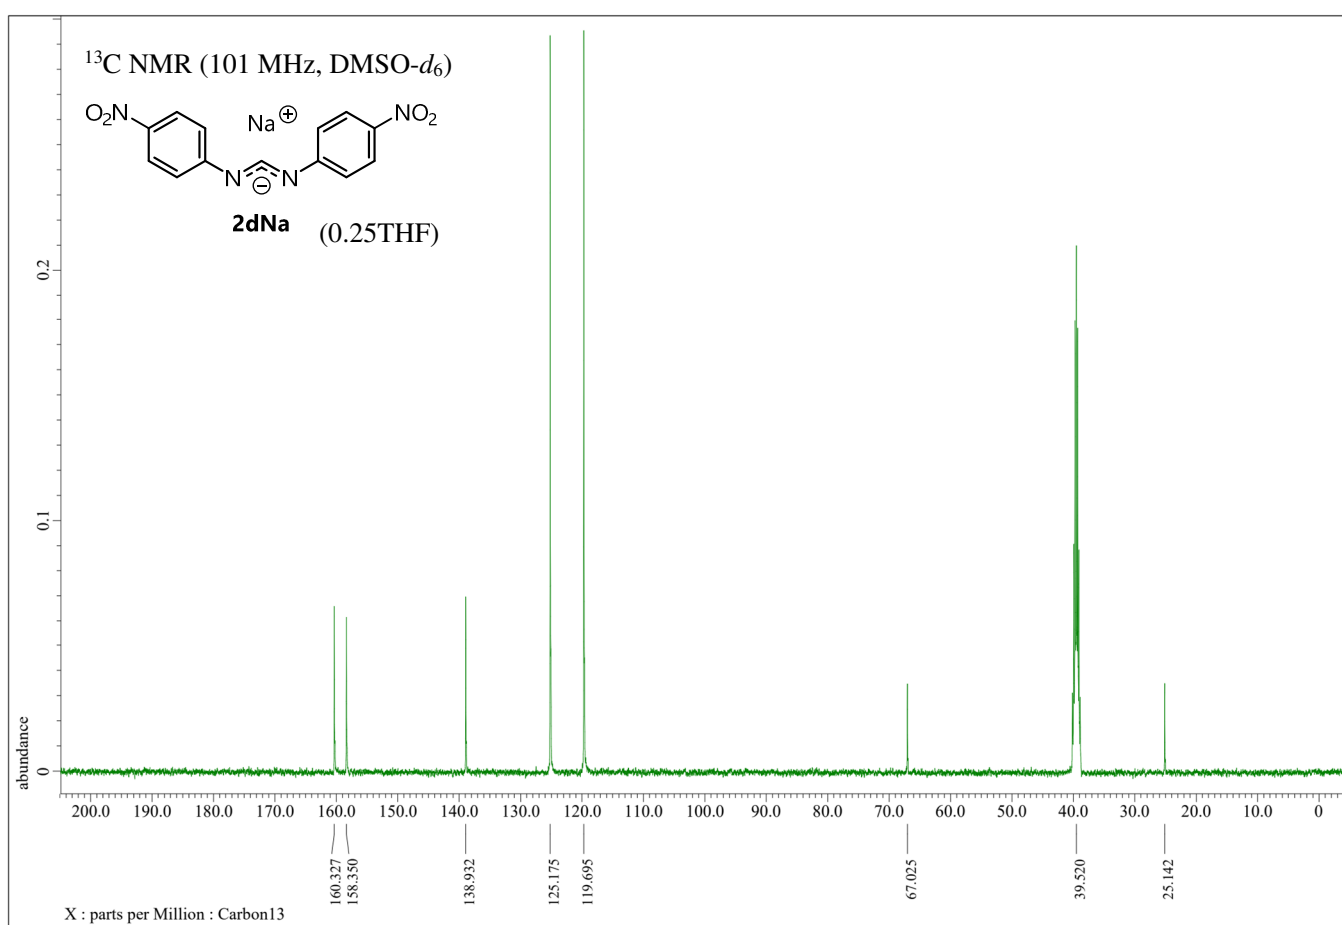

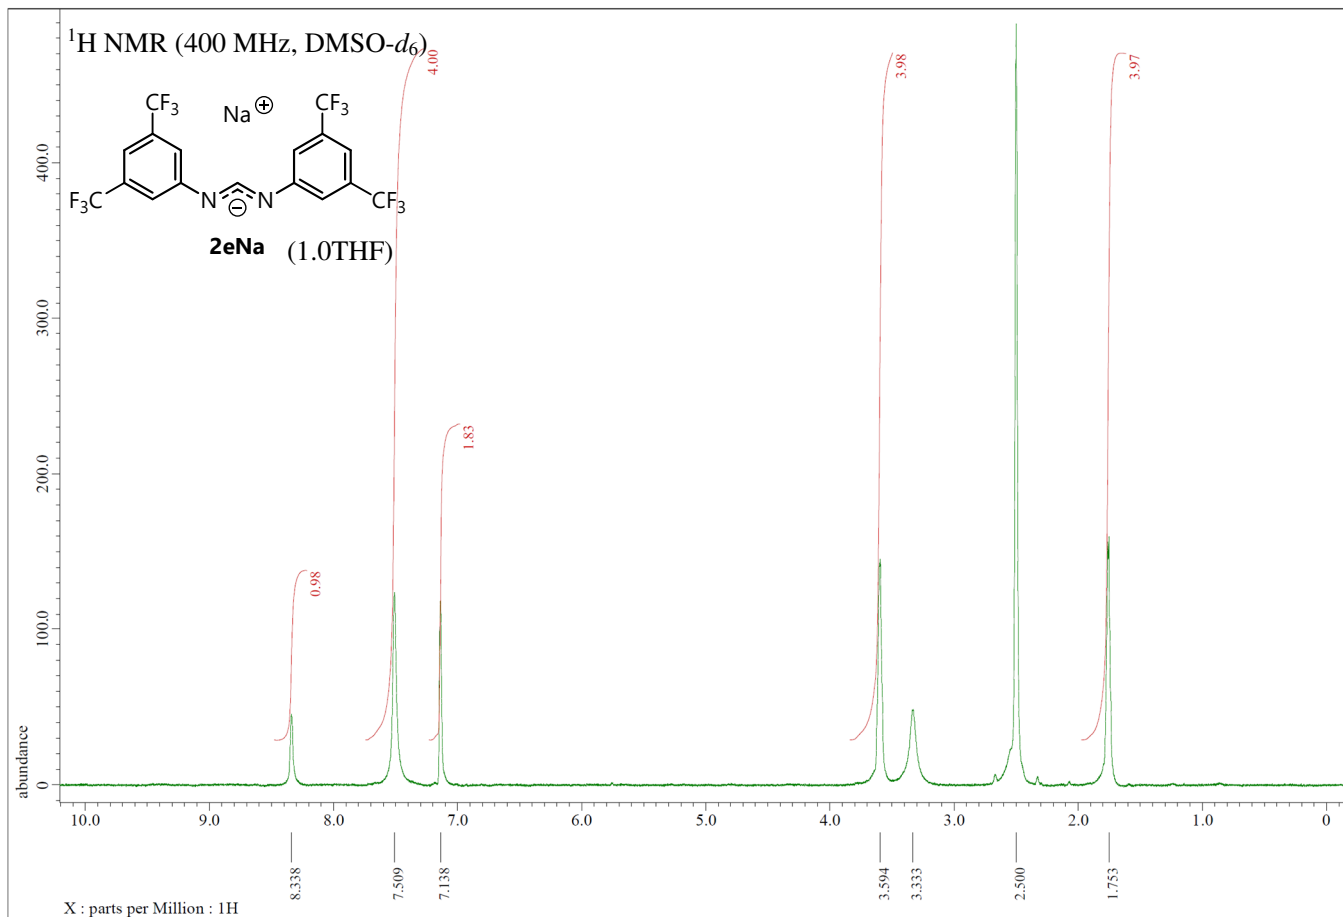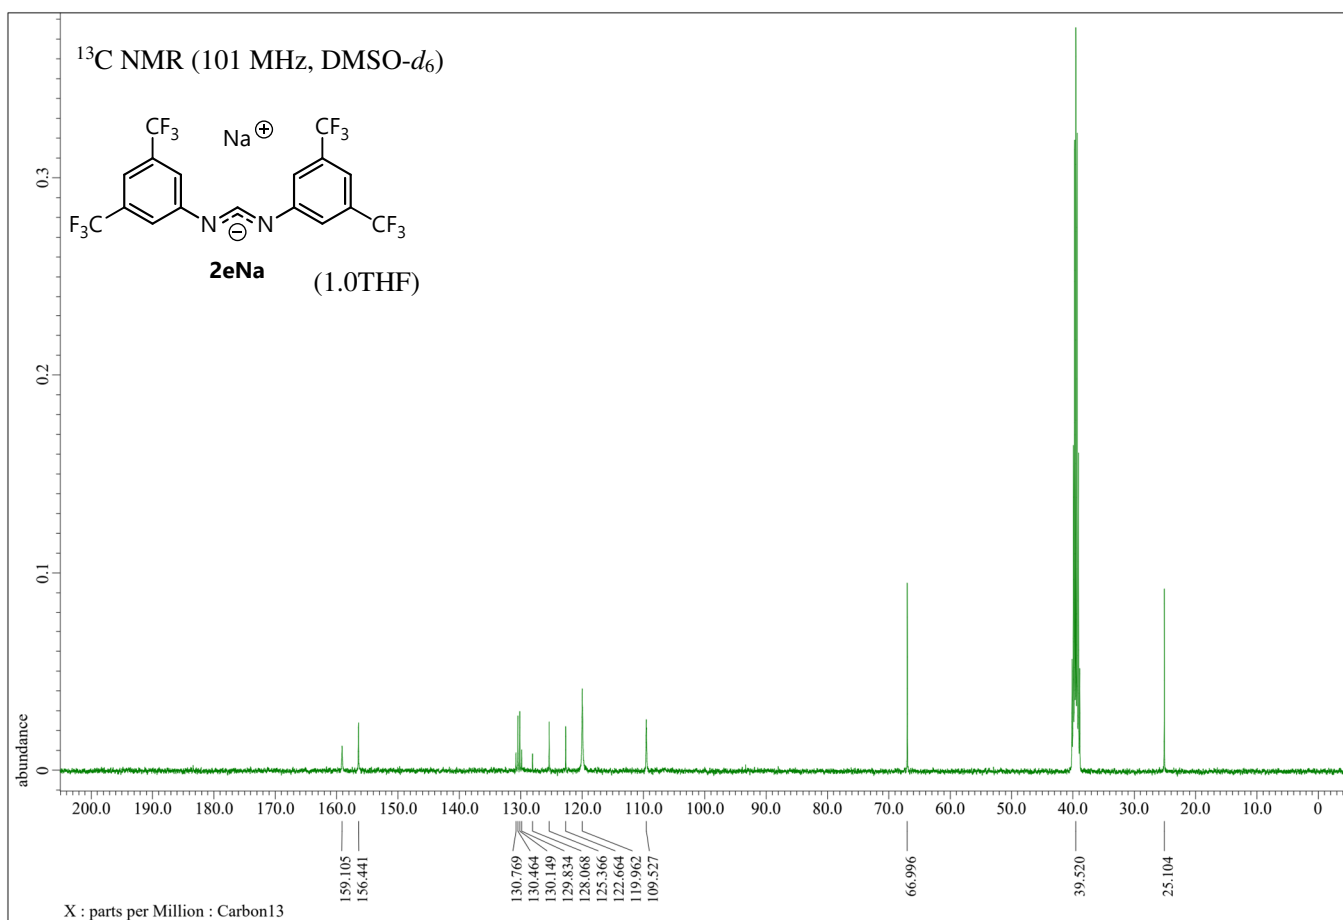

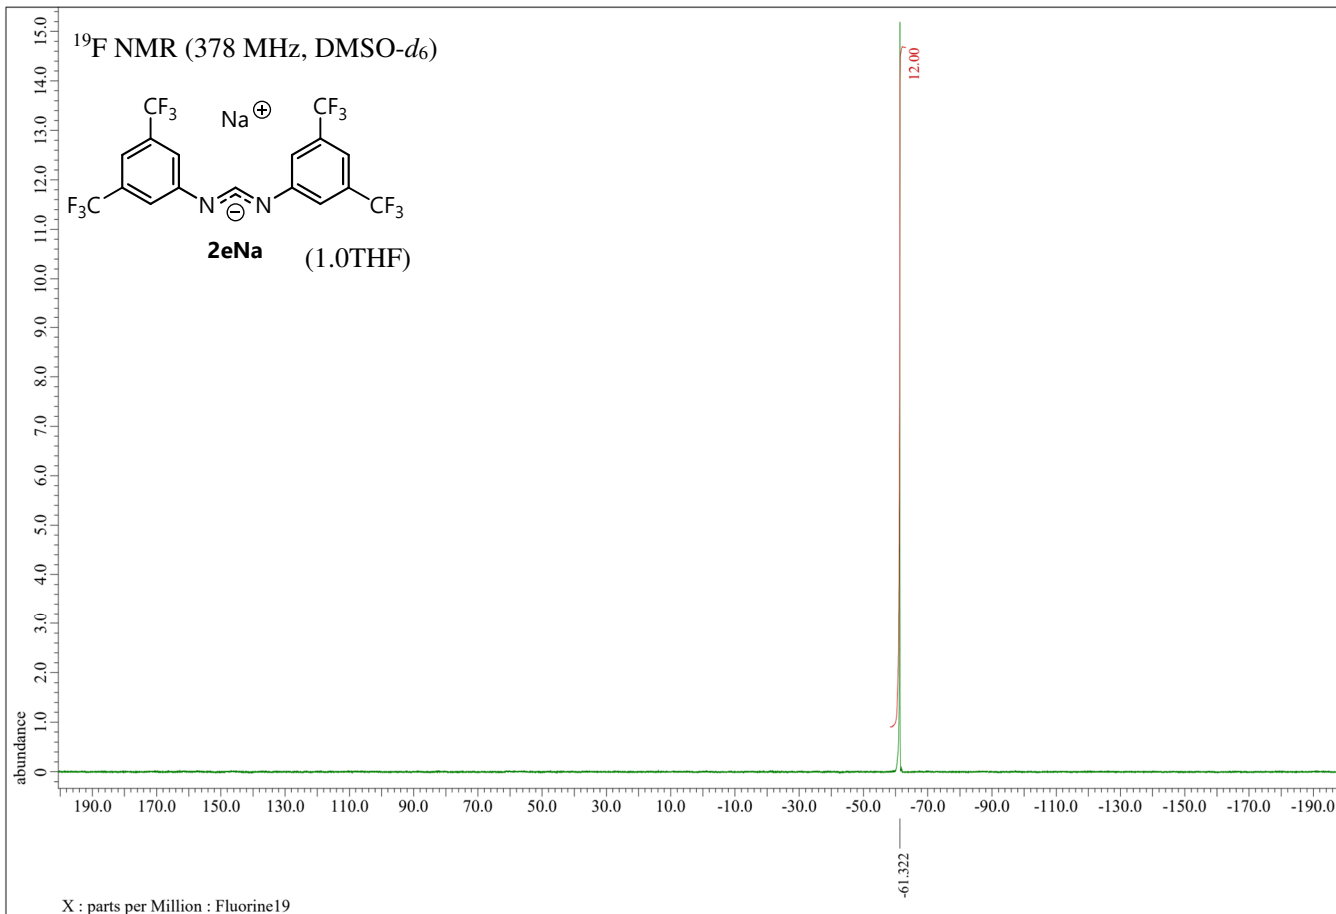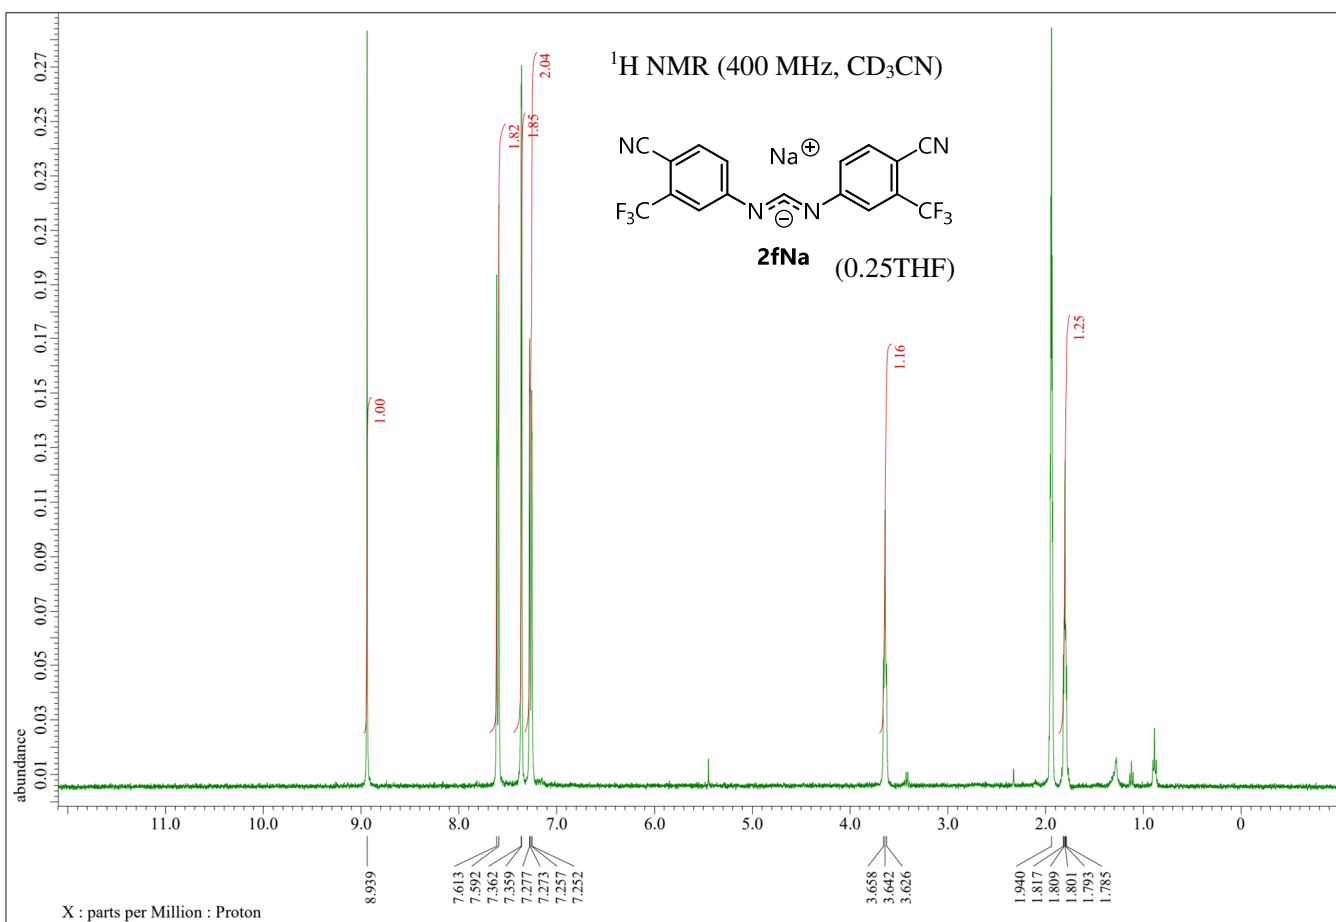



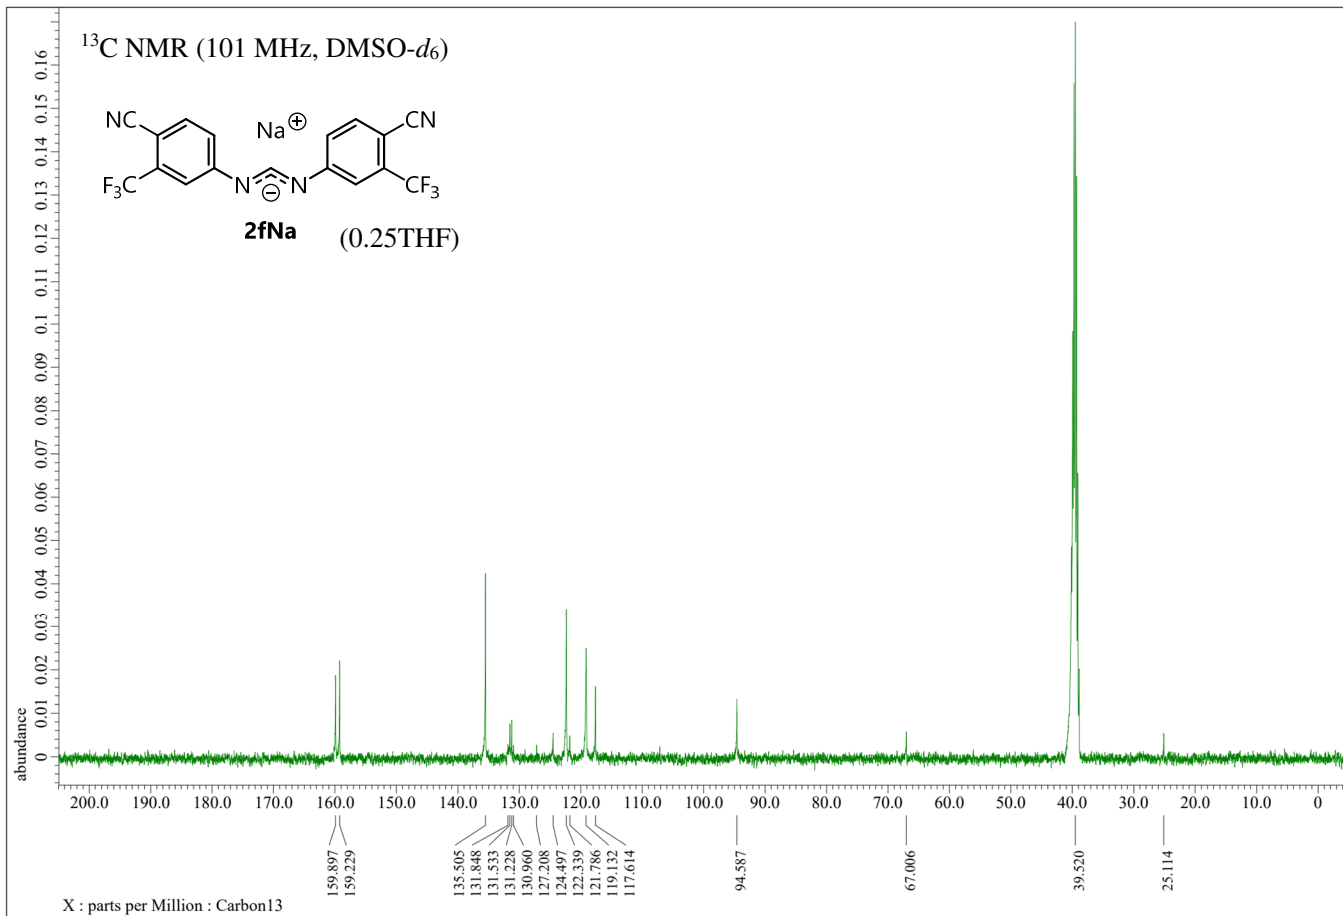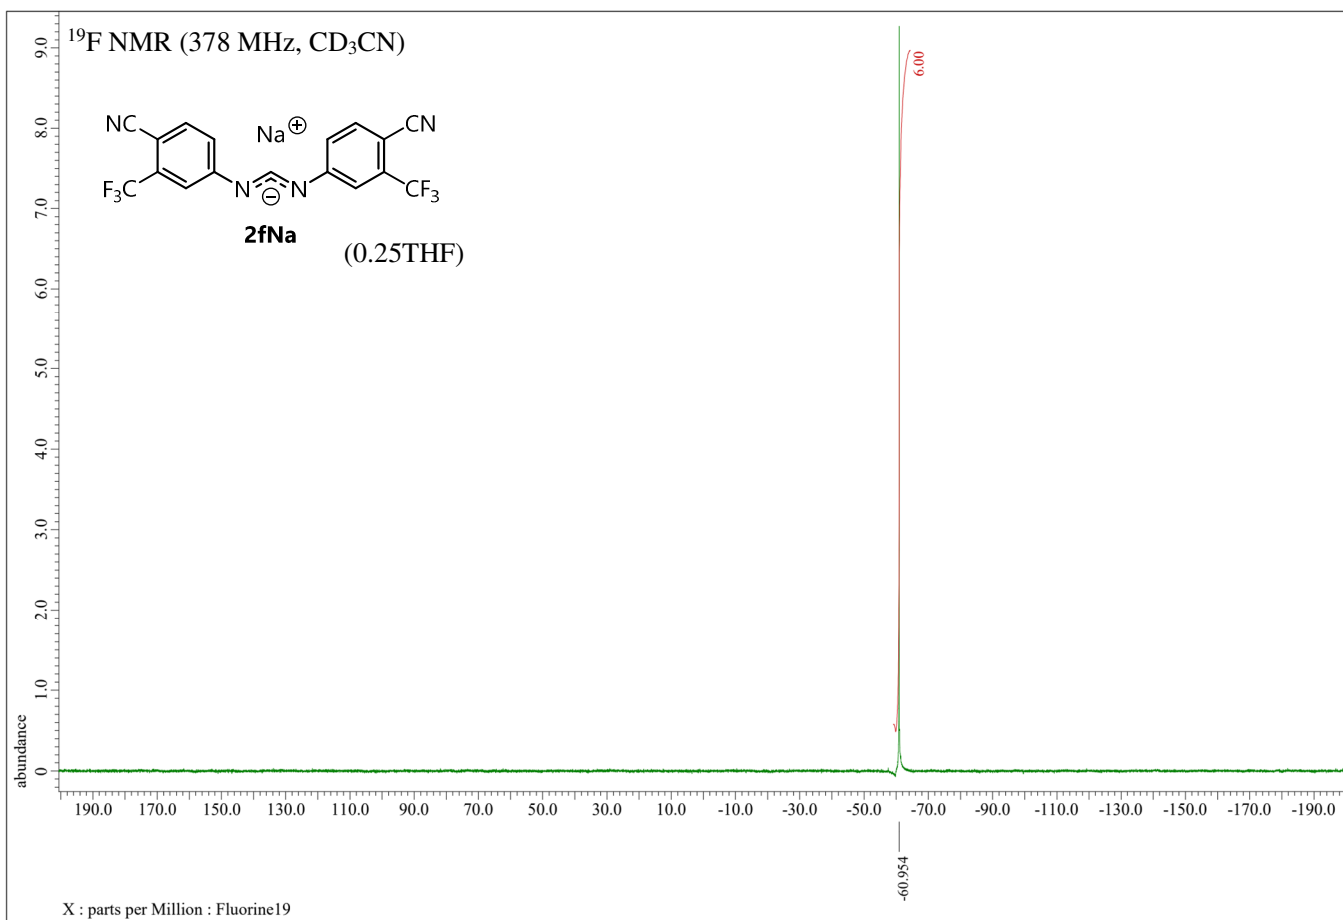

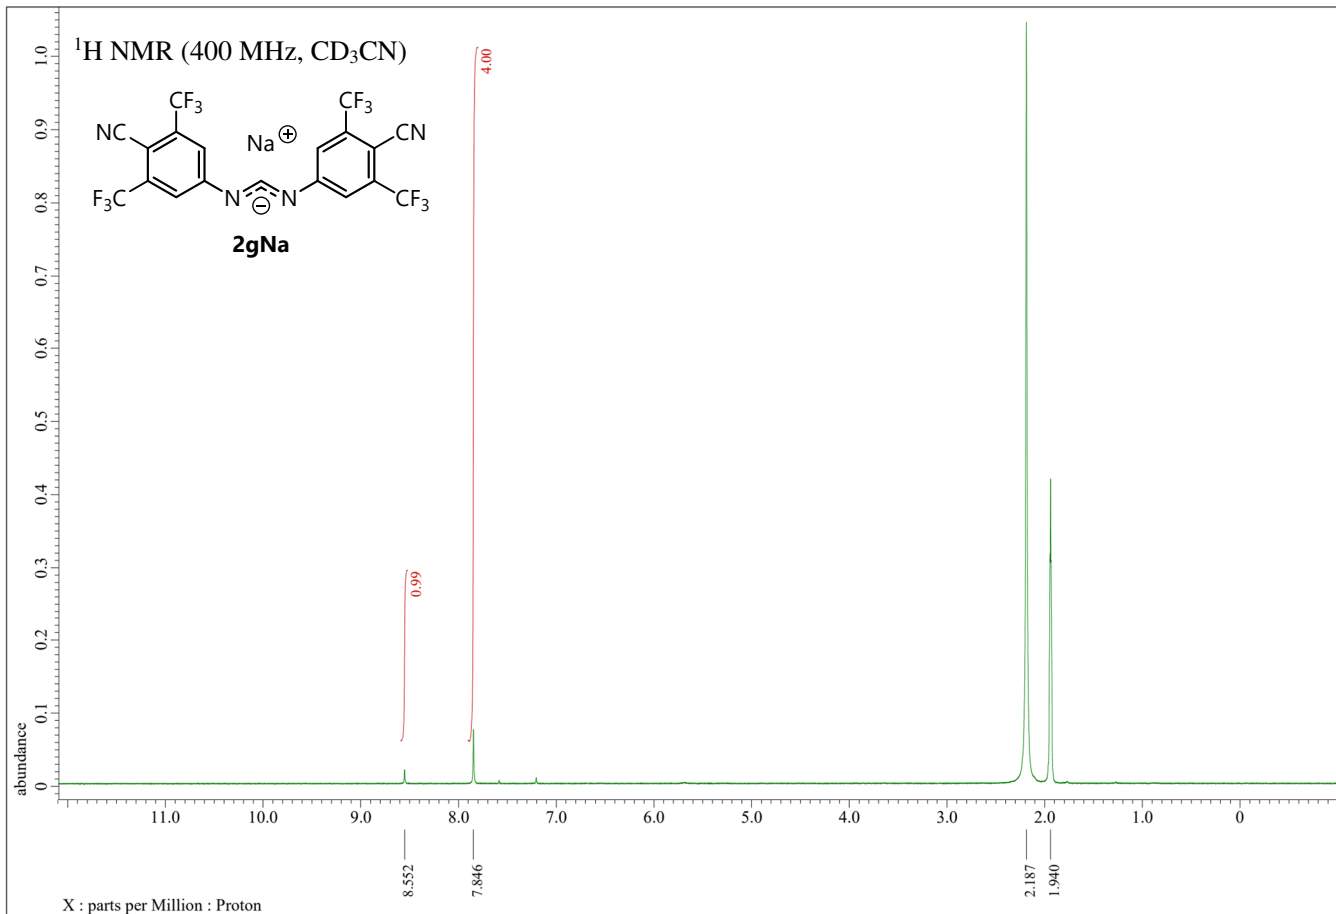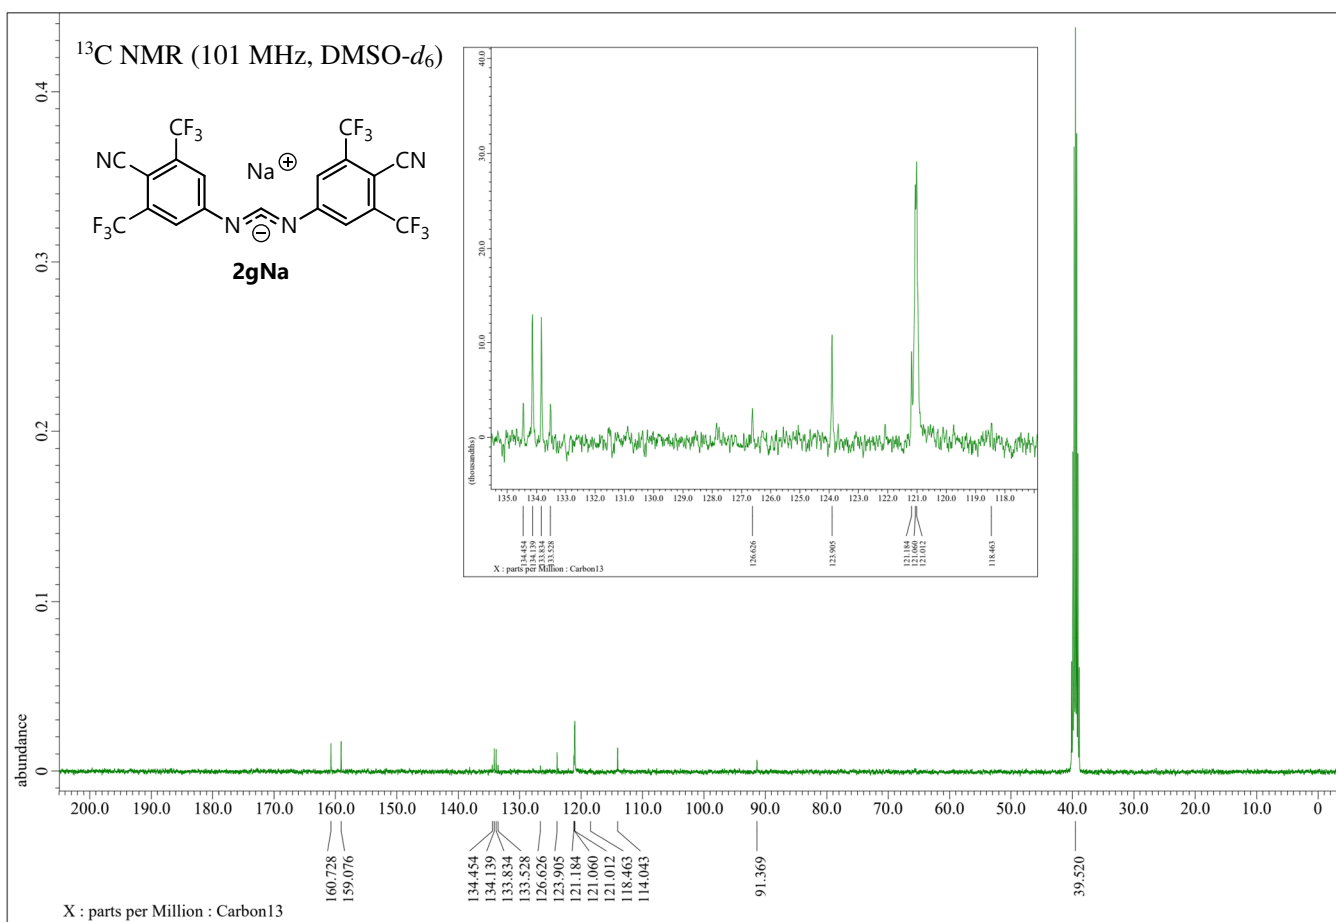

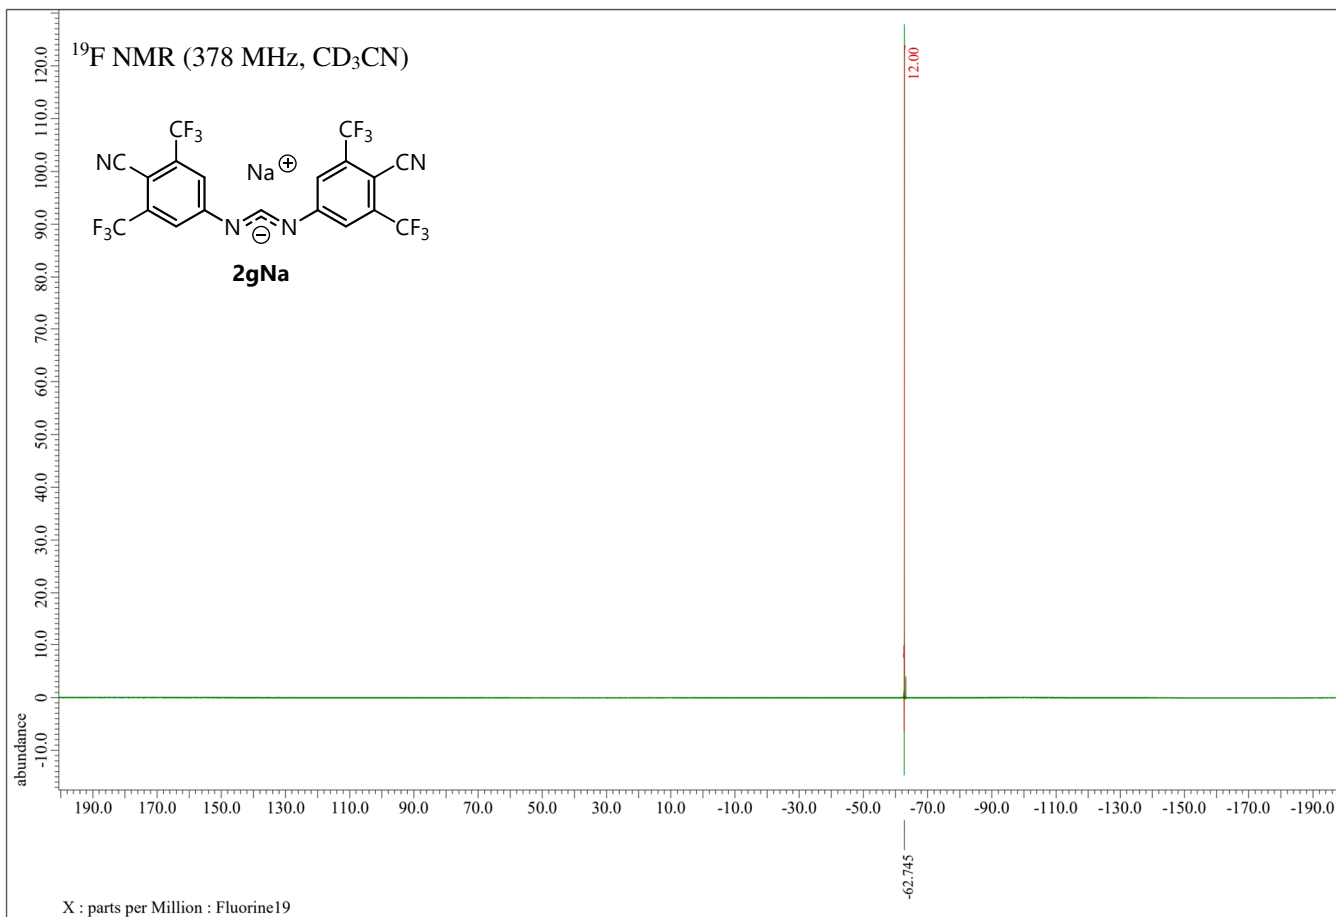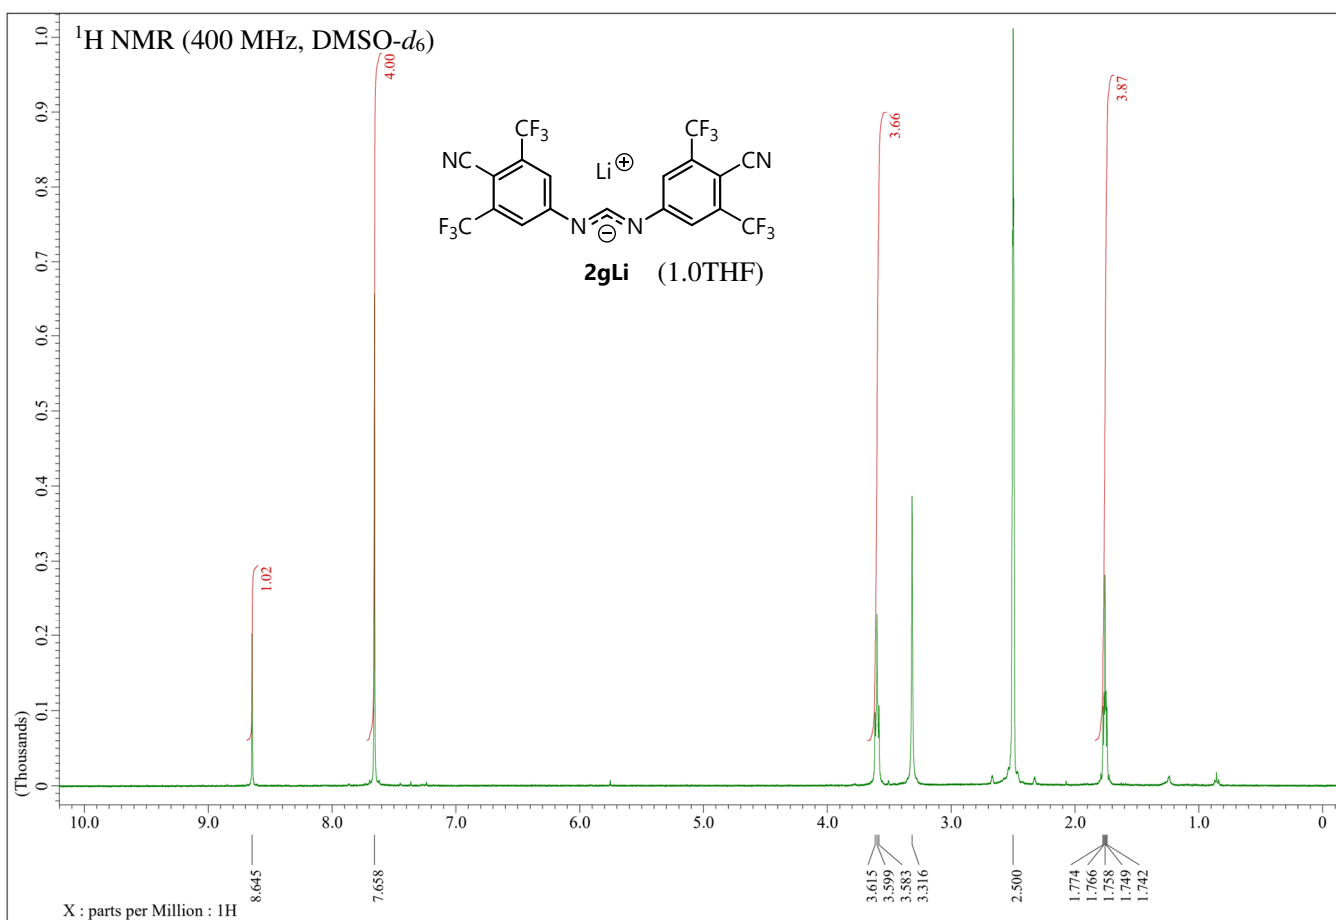

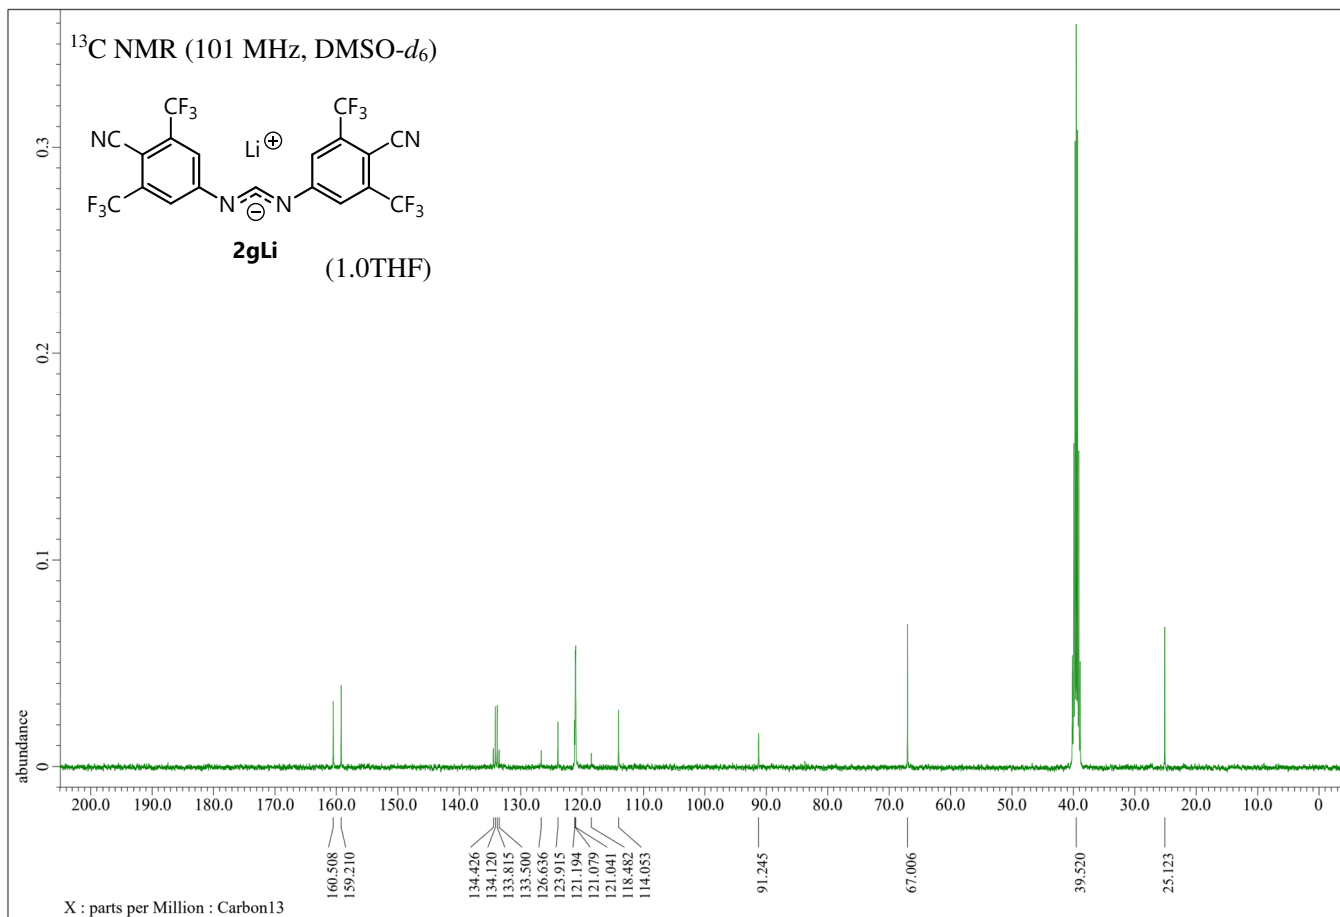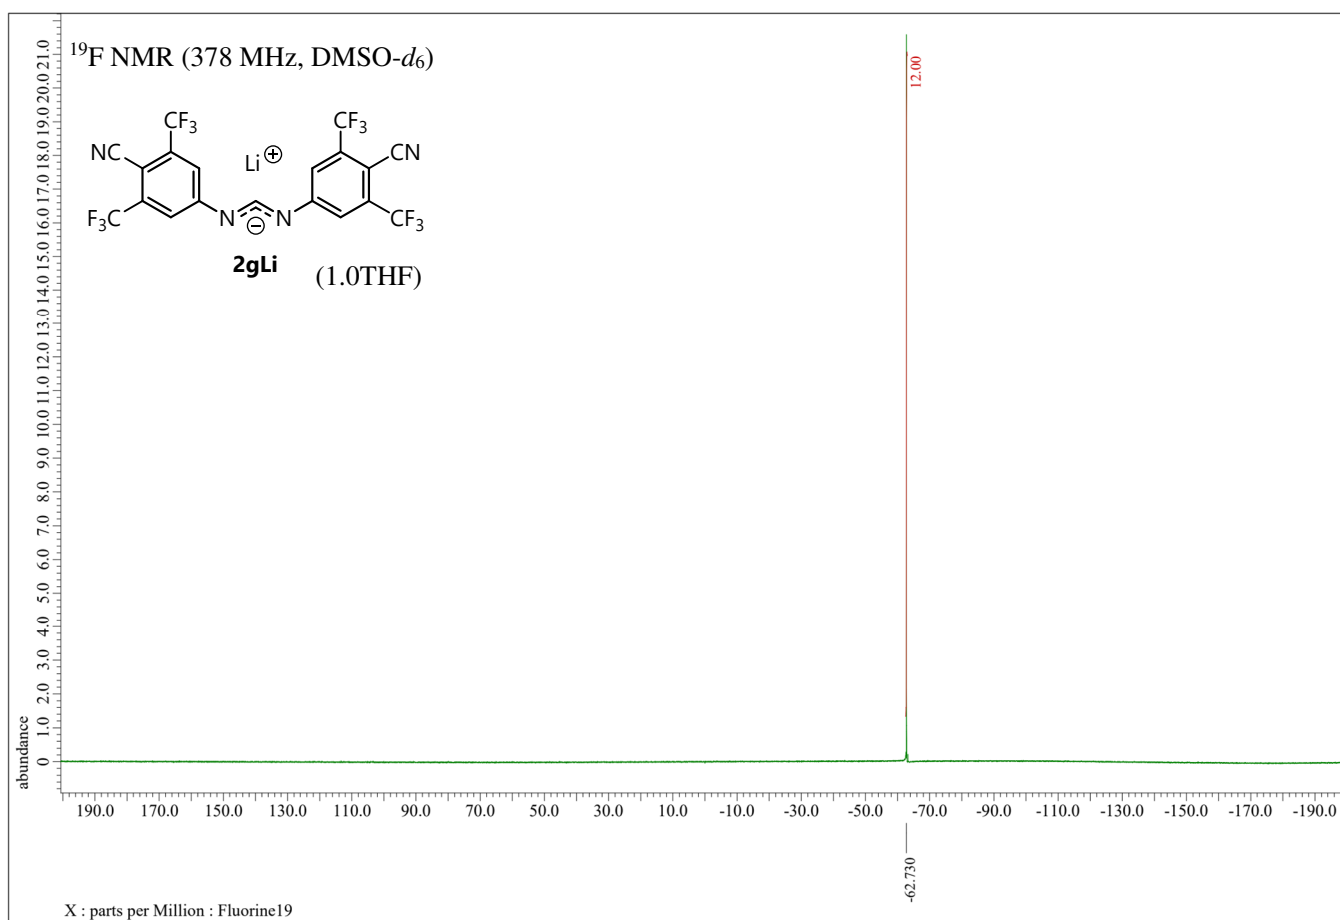

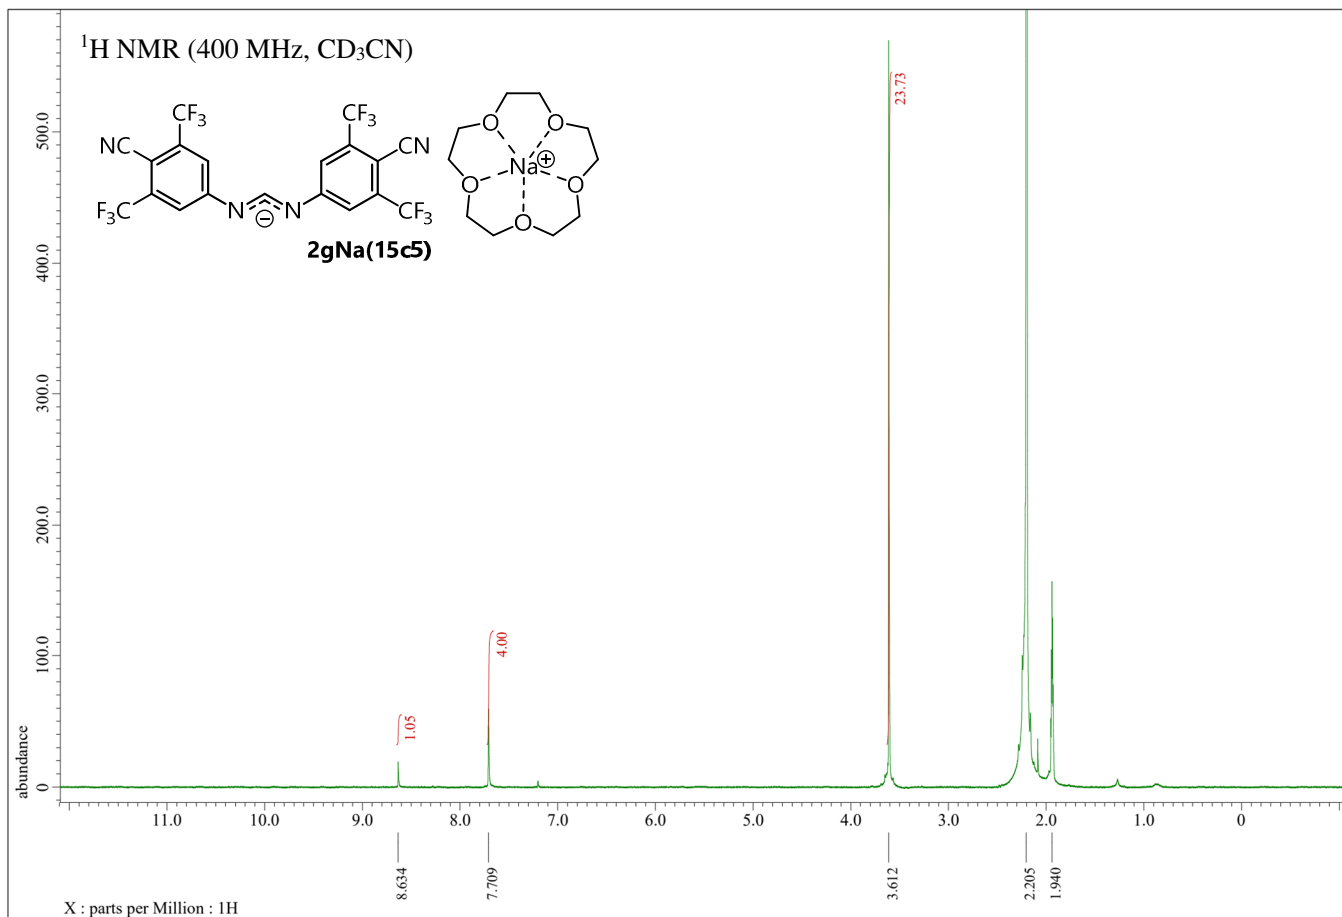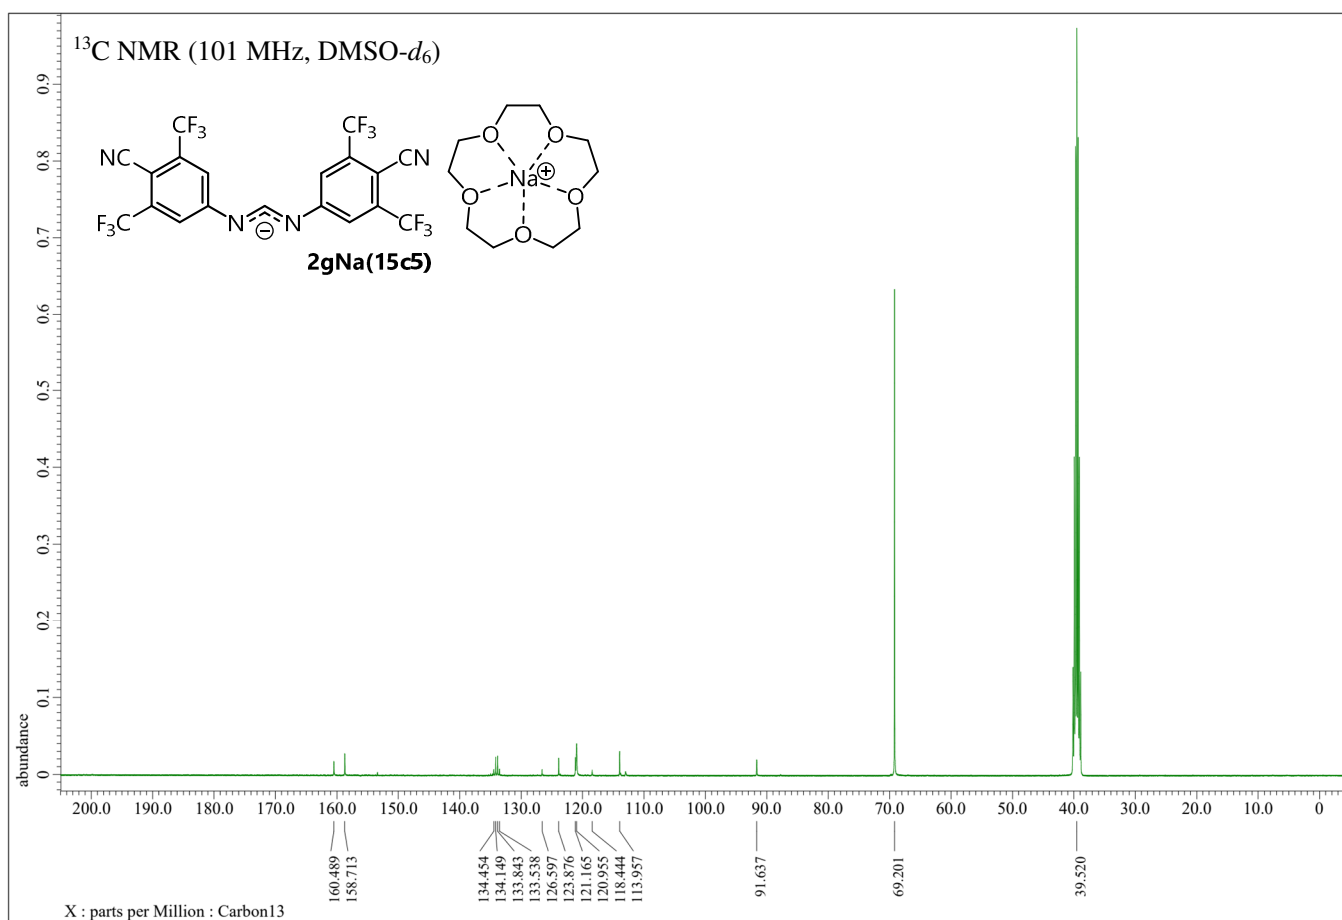

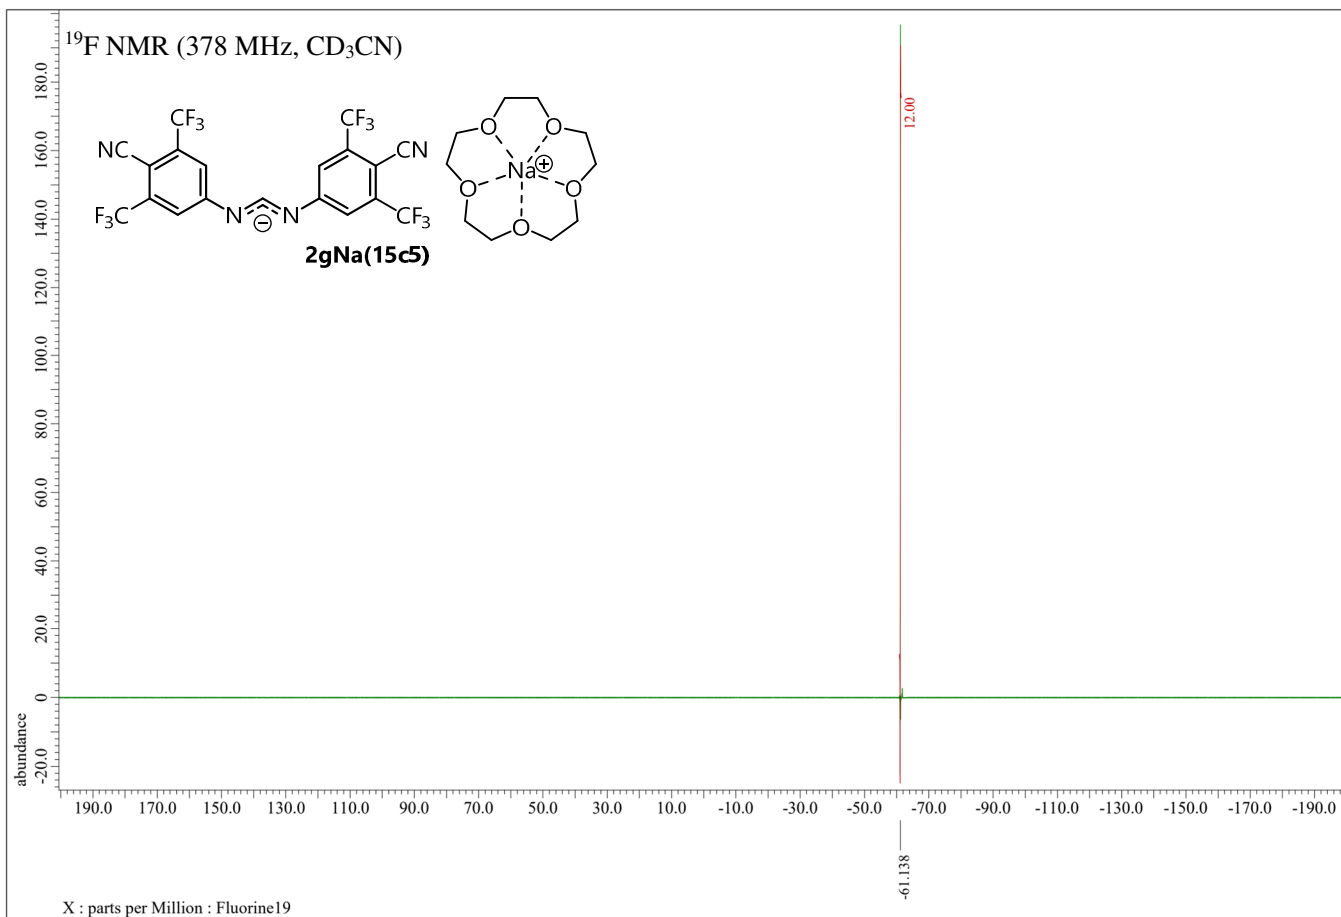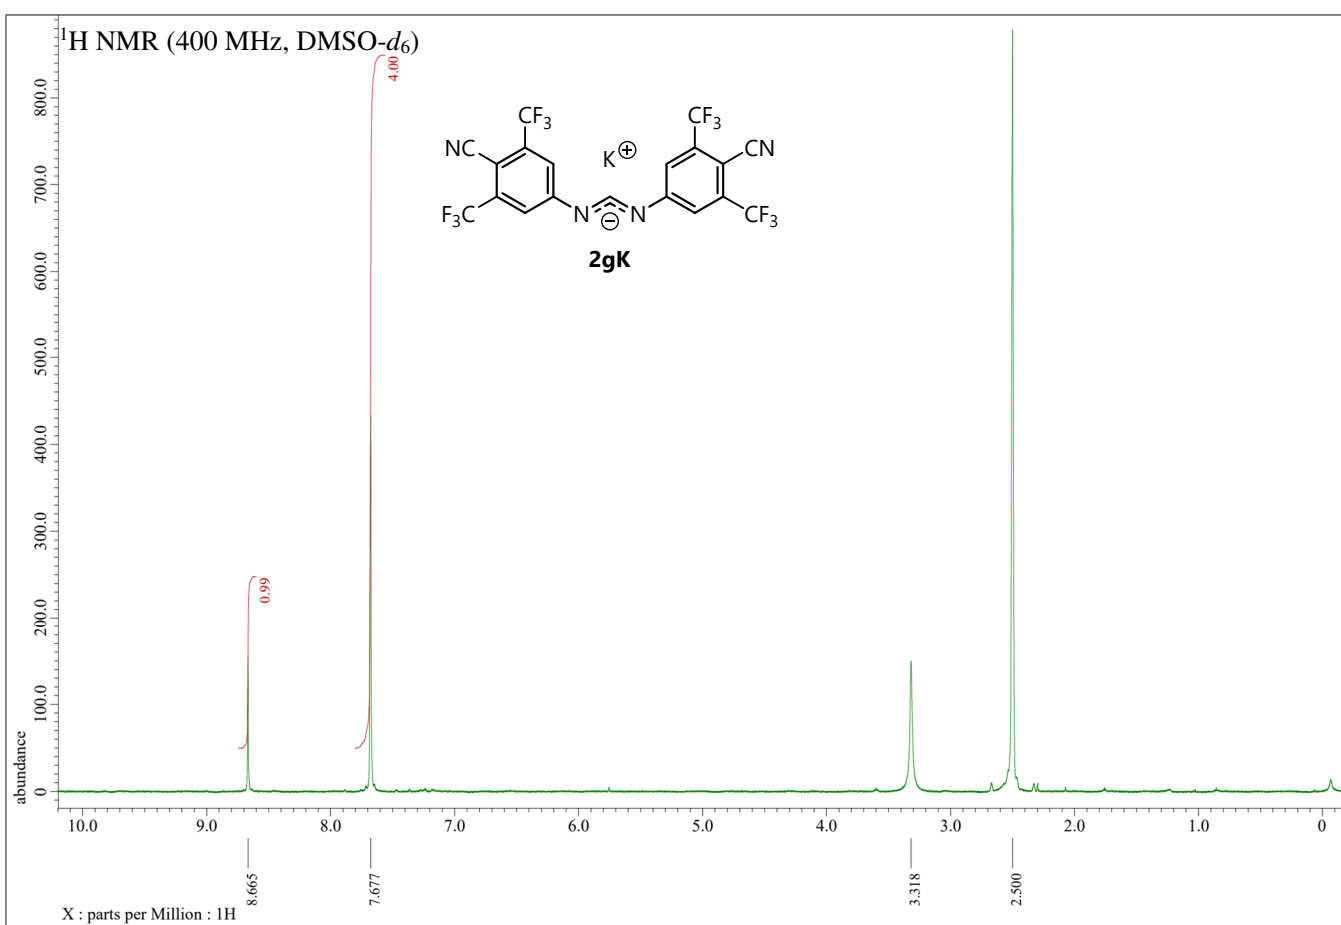

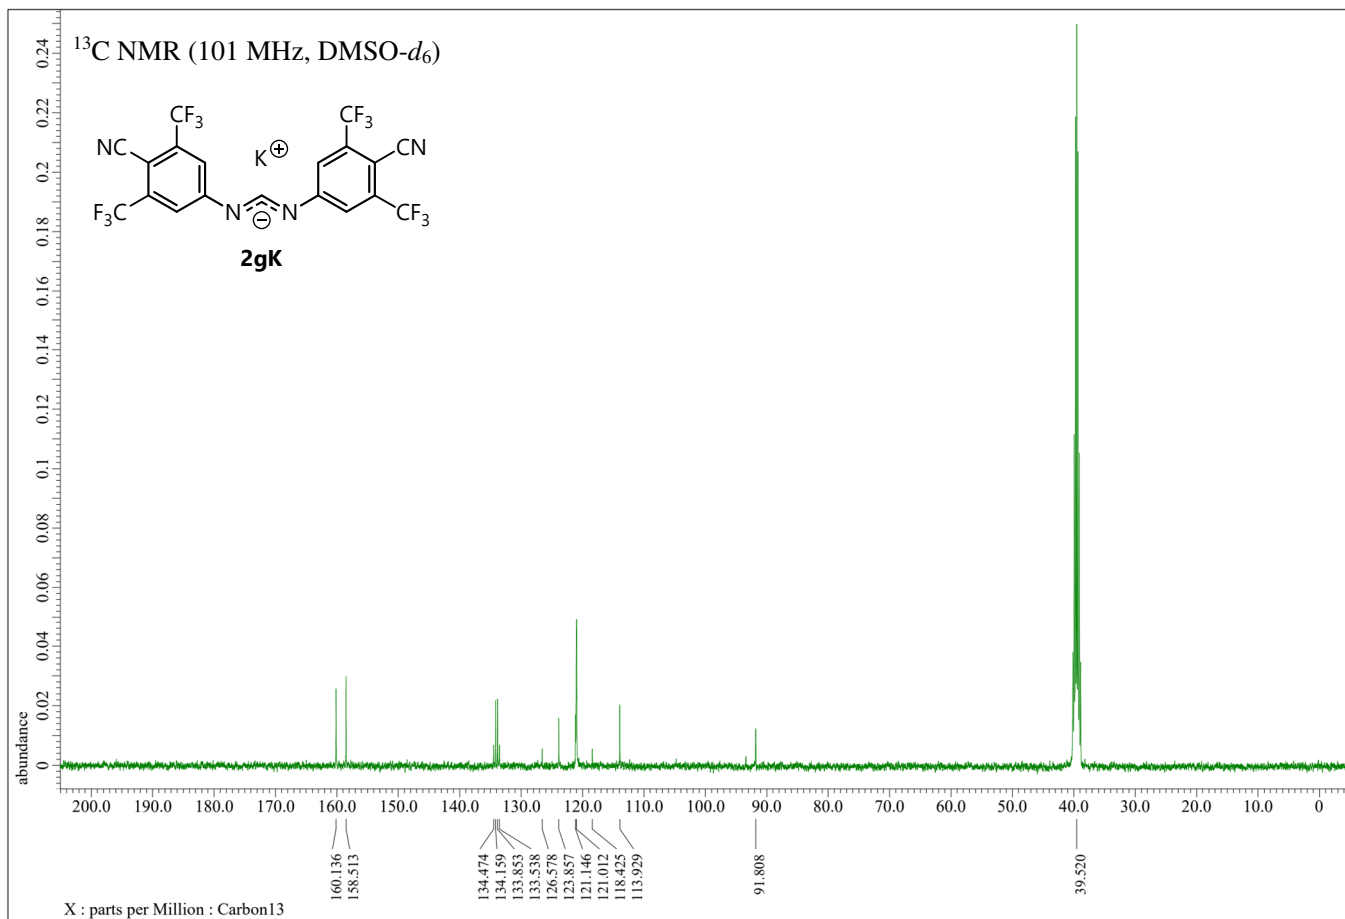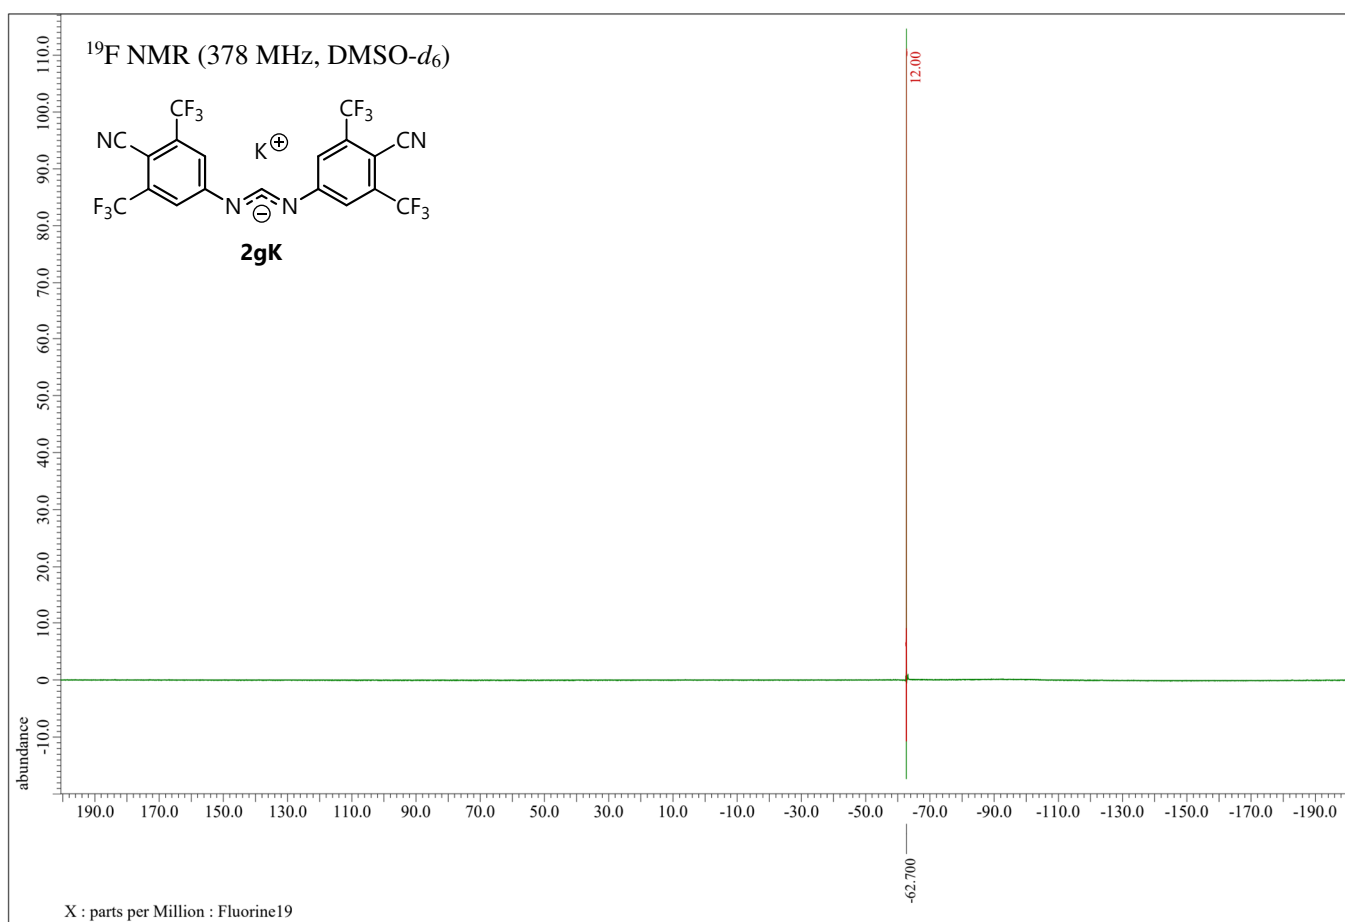





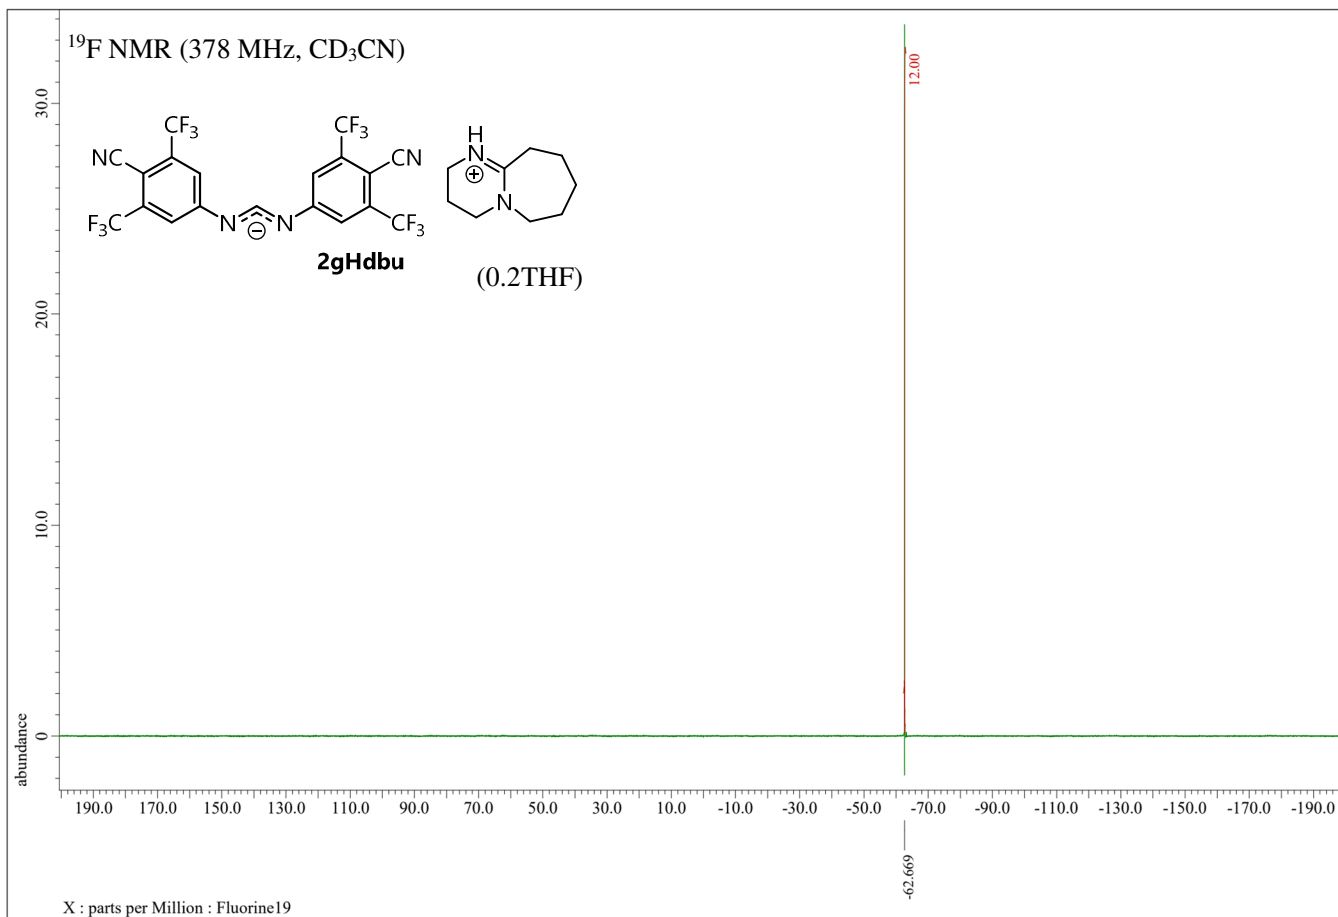

## (L) References

- S1) C. Zhao, C. A. Sojda, W. Myint and D. Seidel, *J. Am. Chem. Soc.*, 2017, **139**, 10224.
- S2) P. Brulatti, R. J. Gildea, J. A. K. Howard, V. Fattori, M. Cocchi and J. A. G. Williams, *Inorg. Chem.*, 2012, **51**, 3813.
- S3) I.-Y. Lee, T. D. Gruber, A. Samuels, M. Yun, B. Nam, M. Kang, K. Crowley, B. Winterroth, H. I. Boshoff and C. E. Barry III, *Bioorg. Med. Chem.*, 2013, **21**, 114.
- S4) S. Bulut and W. L. Queen, *J. Org. Chem.*, 2018, **83**, 3806.
- S5) W. Bradley and I. Wright, *J. Chem. Soc.*, 1956, 640.
- S6) E. Crundwell, *J. Chem. Soc.*, 1956, 368.
- S7) I. A. Z. Squire, C. A. Goult, B. C. Thompson, E. Alexopoulos, A. C. Whitwood, T. F. N. Tanner and L. A. Wilkinson, *Inorg. Chem.*, 2022, **61**, 19144.
- S8) L. Onsager, *J. Am. Chem. Soc.*, 1936, **58**, 1486.
- S9) M. J. Frisch, G. W. Trucks, H. B. Schlegel, G. E. Scuseria, M. A. Robb, J. R. Cheeseman, G. Scalmani, V. Barone, B. Mennucci, G. A. Petersson, H. Nakatsuji, M. Caricato, X. Li, H. P. Hratchian, A. F. Izmaylov, J. Bloino, G. Zheng, J. L. Sonnenberg, M. Hada, M. Ehara, K. Toyota, R. Fukuda, J. Hasegawa, M. Ishida, T. Nakajima, Y. Honda, O. Kitao, H. Nakai, T. Vreven, J. A., Montgomery, Jr., J. E. Peralta, F. Ogliaro, M. Bearpark, J. J. Heyd, E. Brothers, K. N. Kudin, V. N. Staroverov, R. Kobayashi, J. Normand, K. Raghavachari, A. Rendell, J. C. Burant, S. S. Iyengar, J. Tomasi, M. Cossi, N. Rega, J. M. Millam, M. Klene, J. E. Knox, J. B. Cross, V. Bakken, C. Adamo, J. Jaramillo, R. Gomperts, R. E. Stratmann, O. Yazyev, A. J. Austin, R. Cammi, C. Pomelli, J. W. Ochterski, R. L. Martin, K. Morokuma, V. G. Zakrzewski, G. A. Voth, P. Salvador, J. J. Dannenberg, S. Dapprich, A. D. Daniels, Ö. Farkas, J. B. Foresman, J. V. Ortiz, J. Cioslowski, D. J. Fox, *Gaussian 09*, Revision C.01; Gaussian, Inc.: Wallingford, CT, 2009.
- S10) (a) A. D. Becke, *J. Chem. Phys.*, 1993, **98**, 5648. (b) C. Lee, W. Yang and R.G. Parr, *Phys. Rev. B*, 1988, **37**, 785. (c) P. J. Stephens, F. J. Devlin, C. F. Chabalowski and M. J. Frisch, *J. Phys. Chem.*, 1994, **98**, 11623.
- S11) (a) S. Grimme, J. Anthony, S. Ehrlich and S. Kreig, *J. Chem. Phys.*, 2010, **132**, 154104. (b) S. Grimme, S. Ehrlich and L. Goerigk, *J. Comput. Chem.*, 2011, **32**, 1456.
- S12) A. V. Marenich, C. J. Cramer and D. G. Truhlar, *J. Phys. Chem. B*, 2009, **113**, 6378.
- S13) (a) B. Mennucci, E. Cancès and J. Tomasi, *J. Phys. Chem. B*, 1997, **101**, 10506. (b) E. Cancès, B. Mennucci and J. Tomasi, *J. Chem. Phys.*, 1997, **107**, 3032. See also a review: J. Tomasi, B. Mennucci and R. Cammi, *Chem. Rev.*, 2005, **105**, 2999.
